# Supplementary material for: Temporal trends in inequalities of the burden of cardiovascular disease across 186 countries and territories
Source: Springer Nature journal article supplement (doi:10.1186/s12939-023-01988-2), 2023-08-24
Supplement: MOESM1 [file 12939_2023_1988_MOESM1_ESM.pdf]

## Additional file 1

**Fig. S1 The change rate of age-standardized DALY rates for rheumatic heart disease from 2000 to 2019**

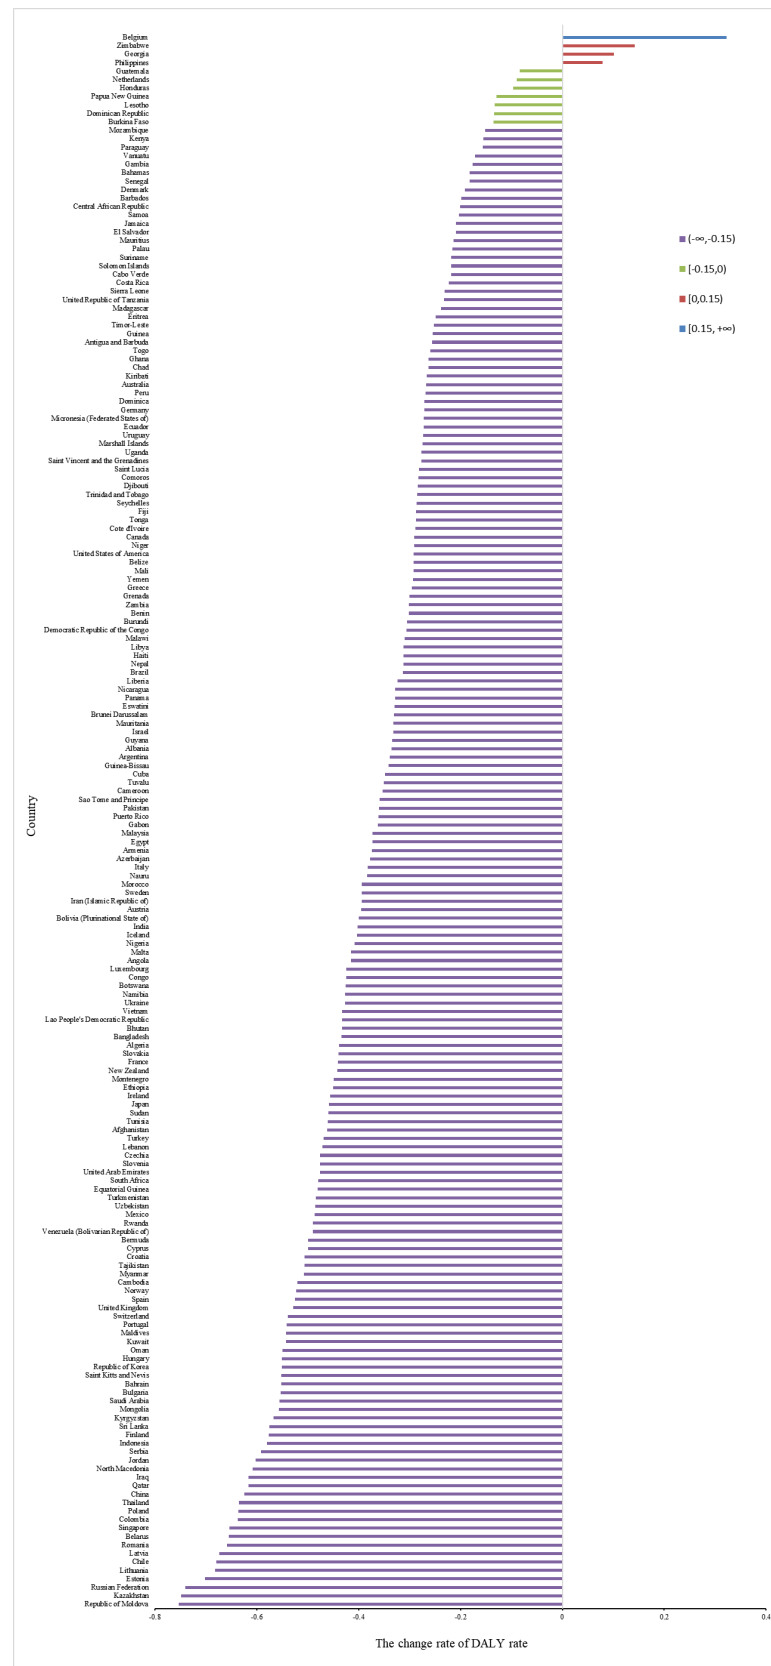

Fig. S2 The change rate of age-standardized DALY rates for ischemic heart disease from 2000 to 2019

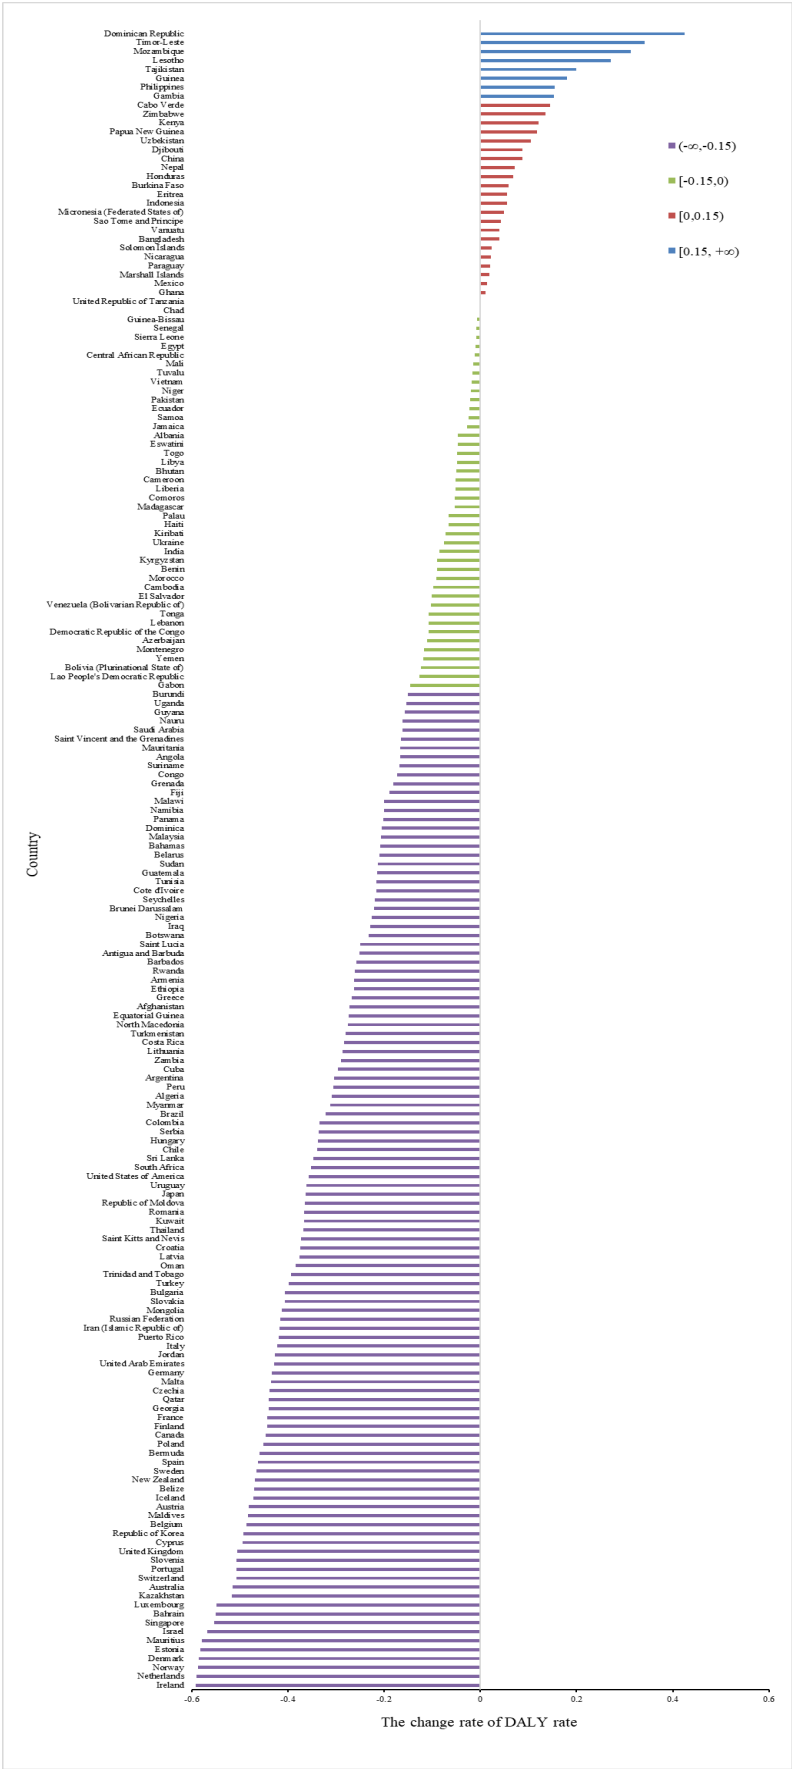

Fig. S3 The change rate of age-standardized DALY rates for stroke from 2000 to 2019

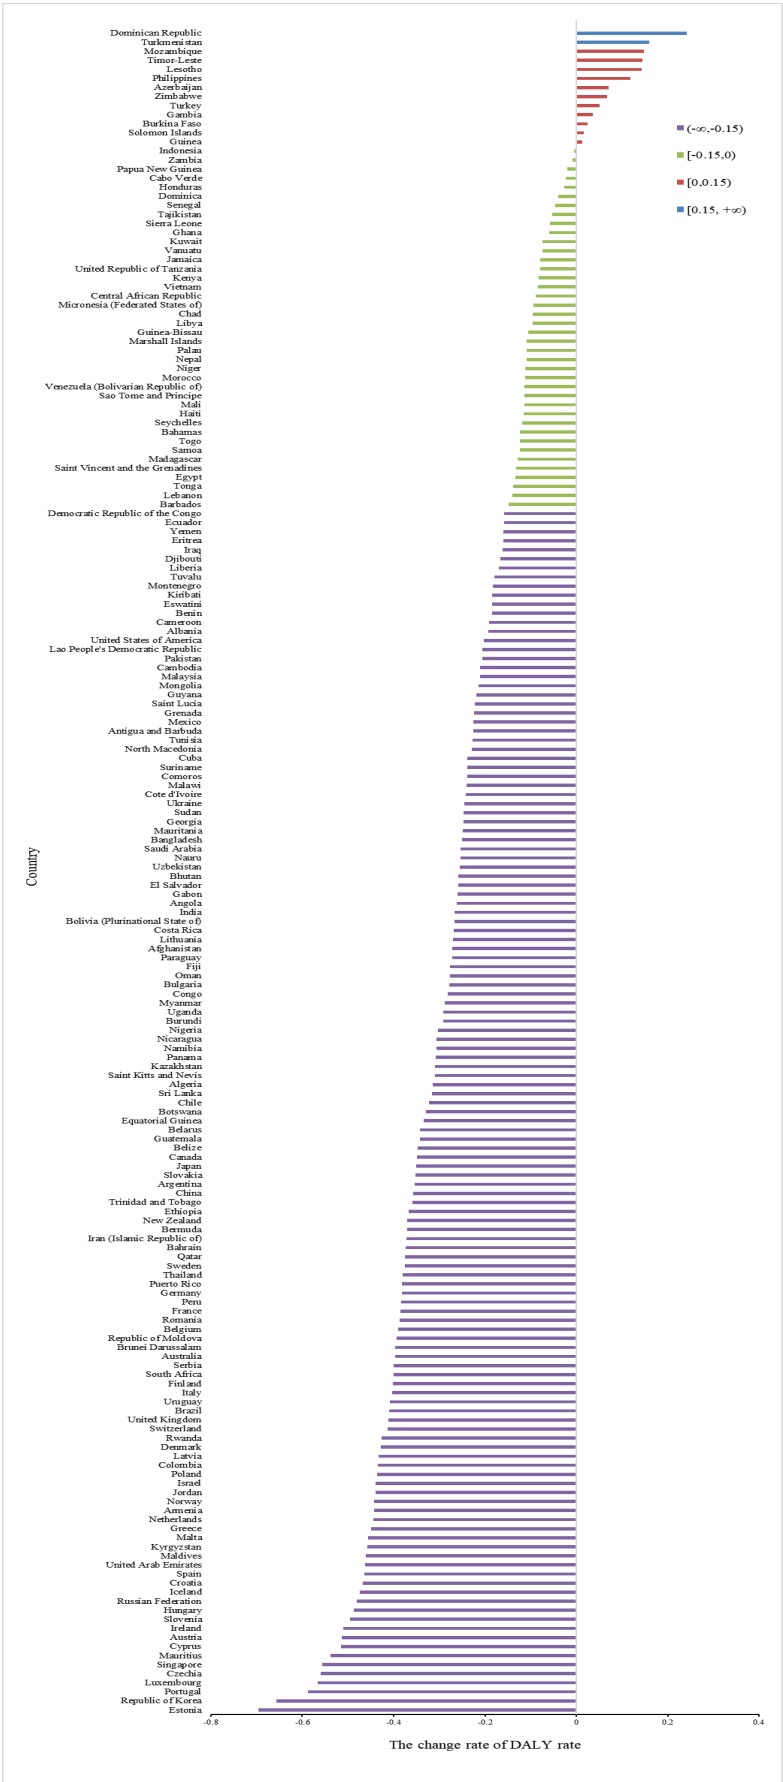

**Fig. S4 The change rate of age-standardized DALY rates for hypertensive heart disease from 2000 to 2019**

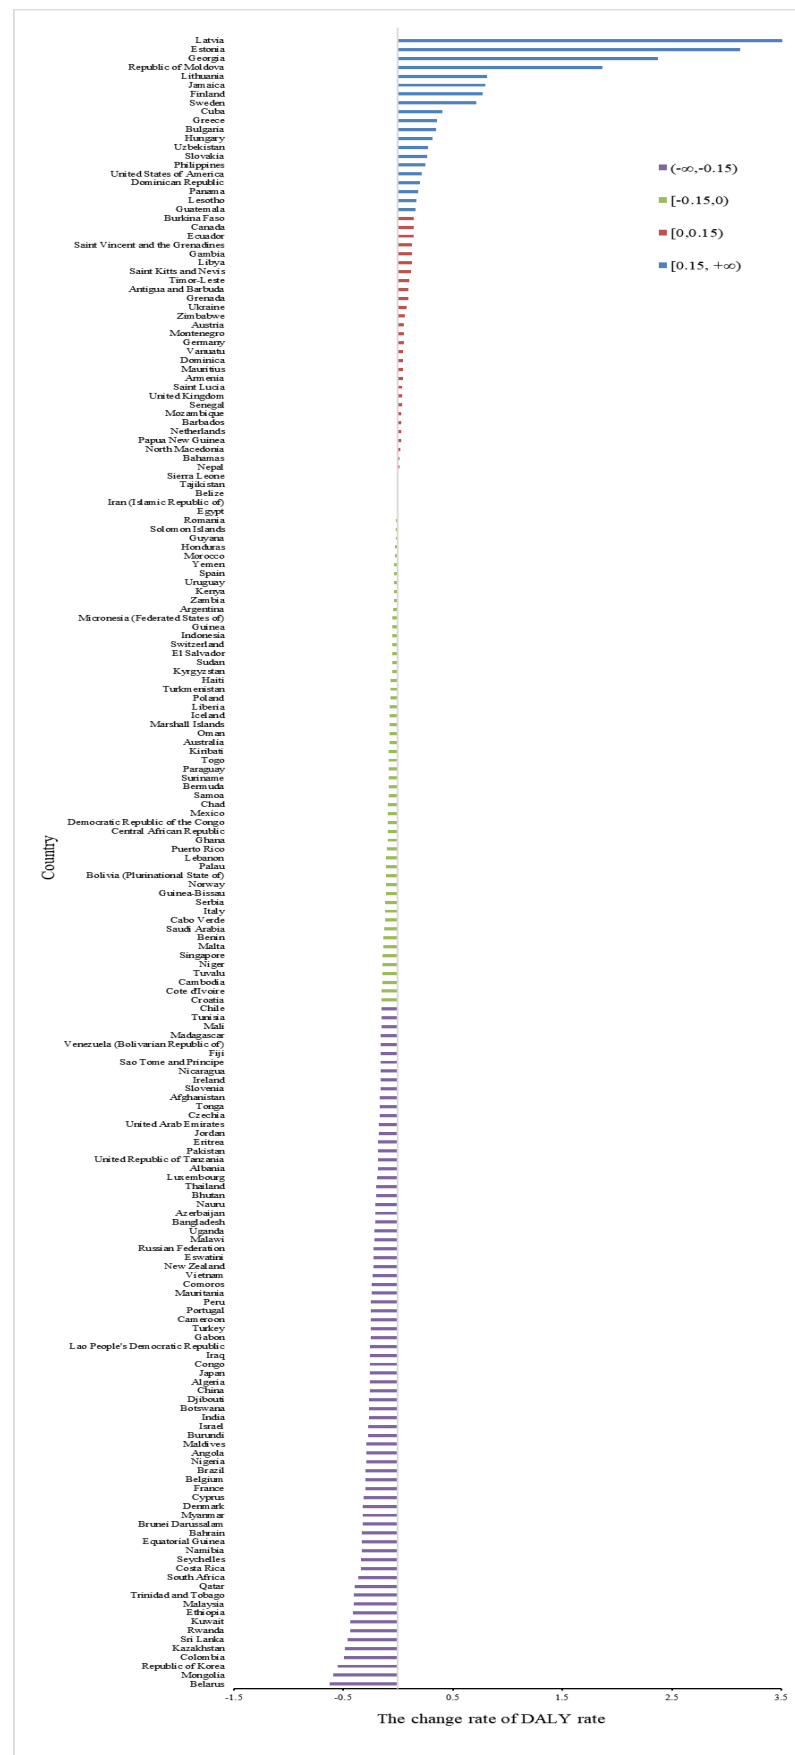

**Fig. S5 The change rate of age-standardized DALY rates for non-rheumatic valvular heart disease from 2000 to 2019**

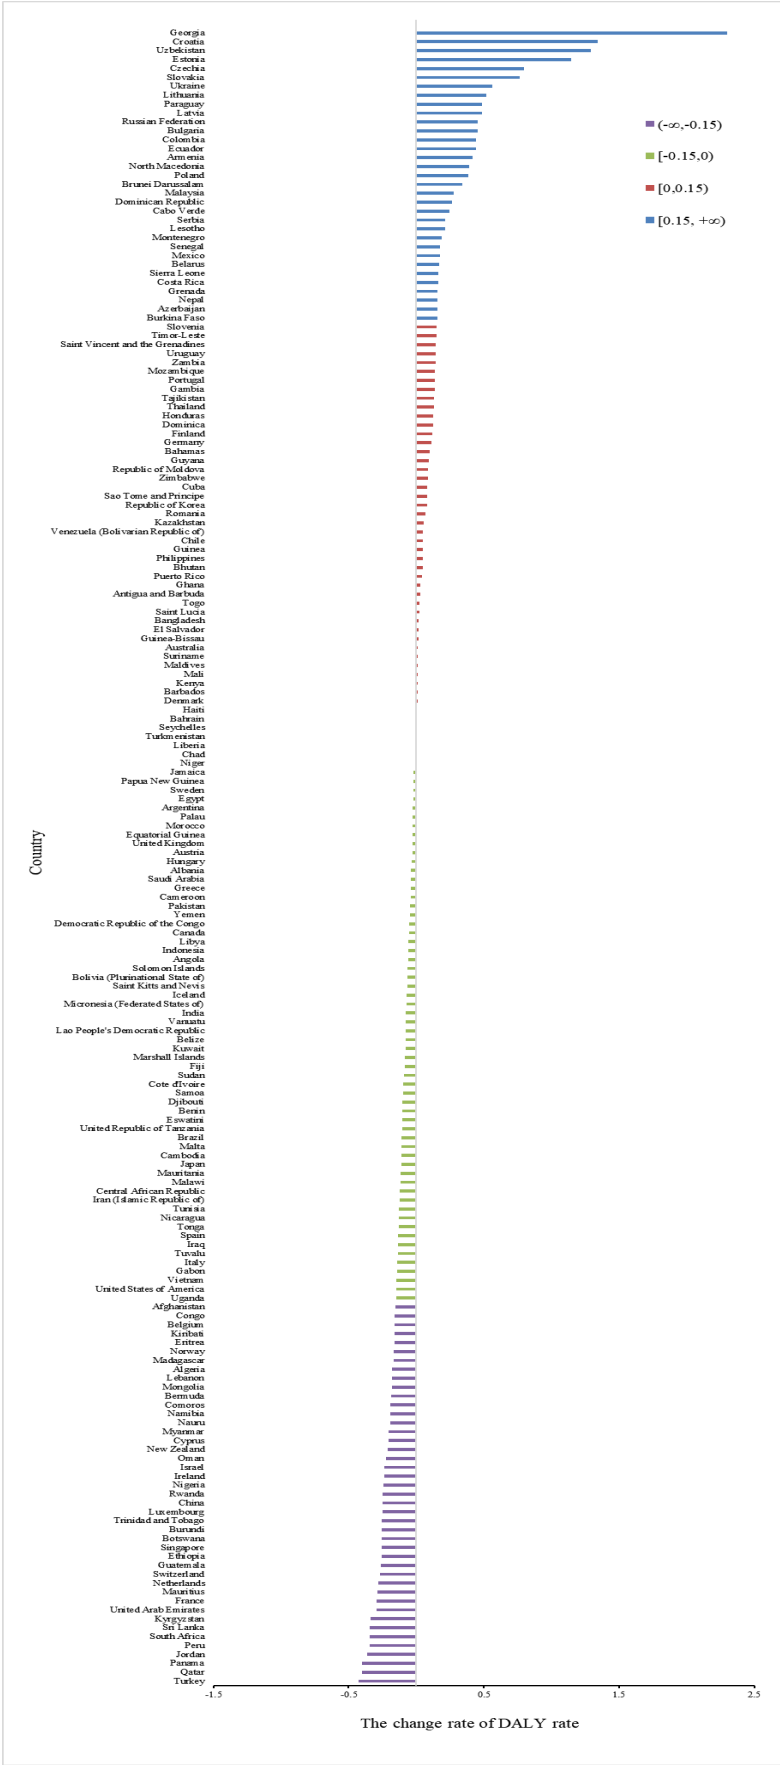

**Fig. S6 The change rate of age-standardized DALY rates for cardiomyopathy and myocarditis from 2000 to 2019**

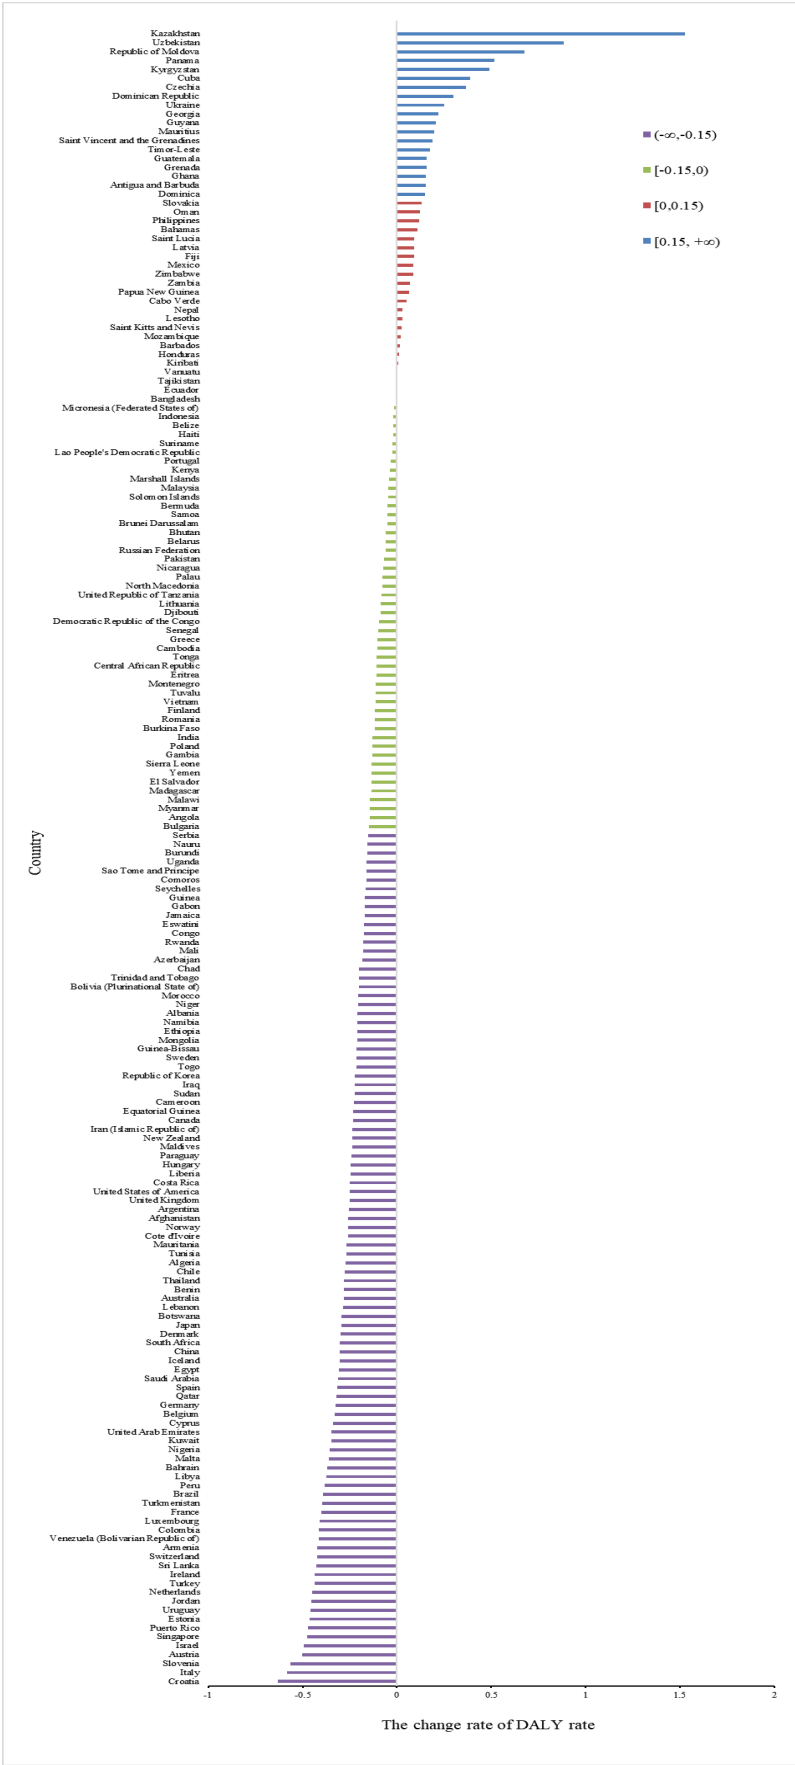

**Fig. S7 The change rate of age-standardized DALY rates for atrial fibrillation and flutter from 2000 to 2019**

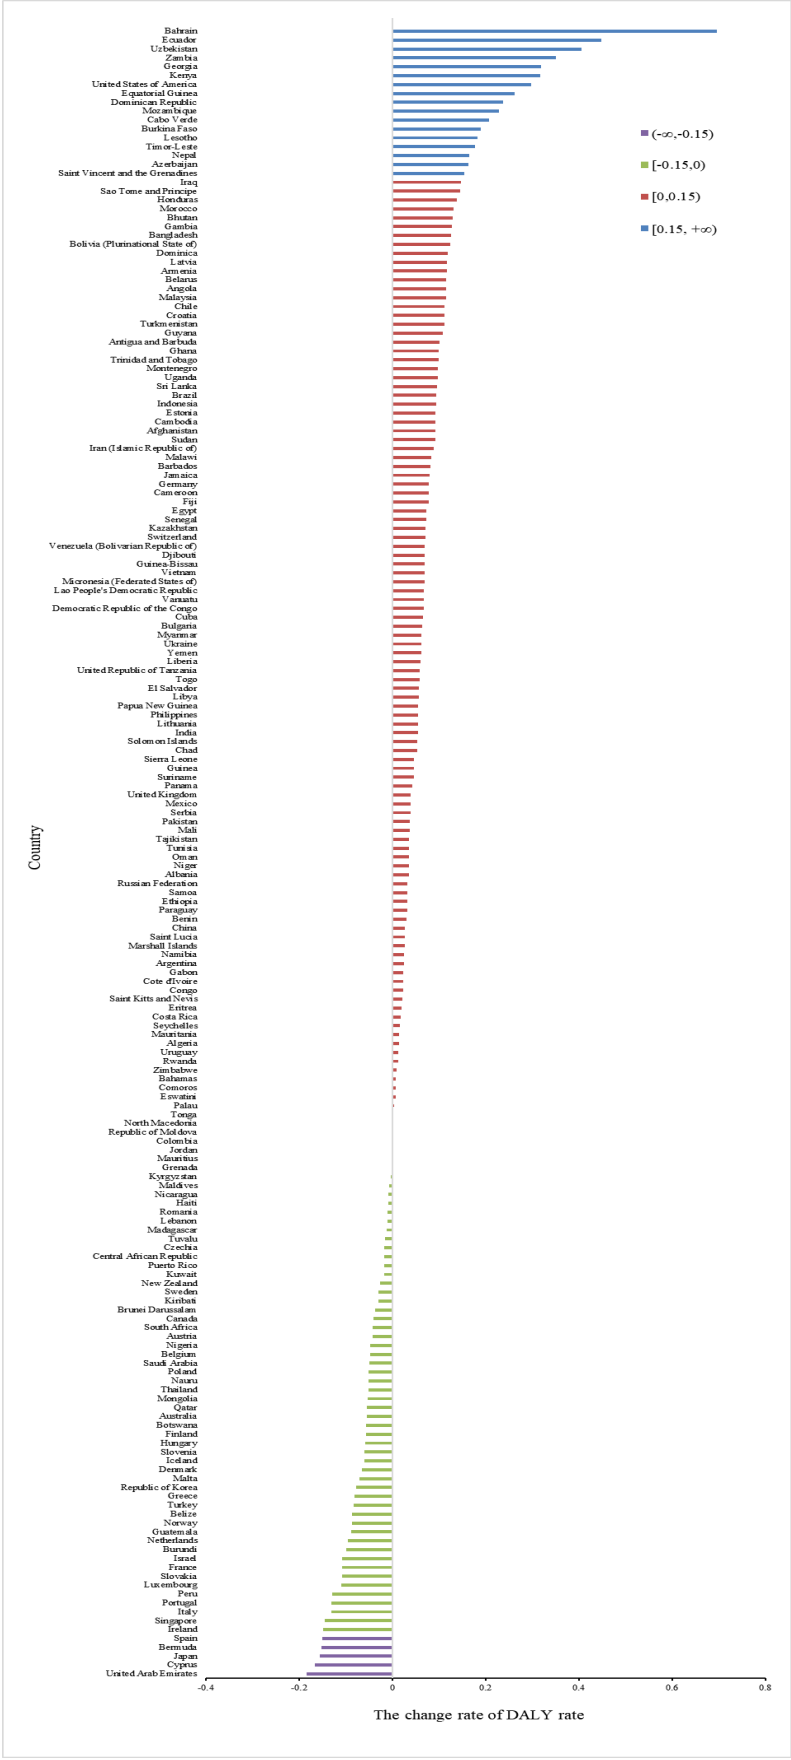

**Fig. S8 The change rate of age-standardized DALY rates for aortic aneurysm from 2000 to 2019**

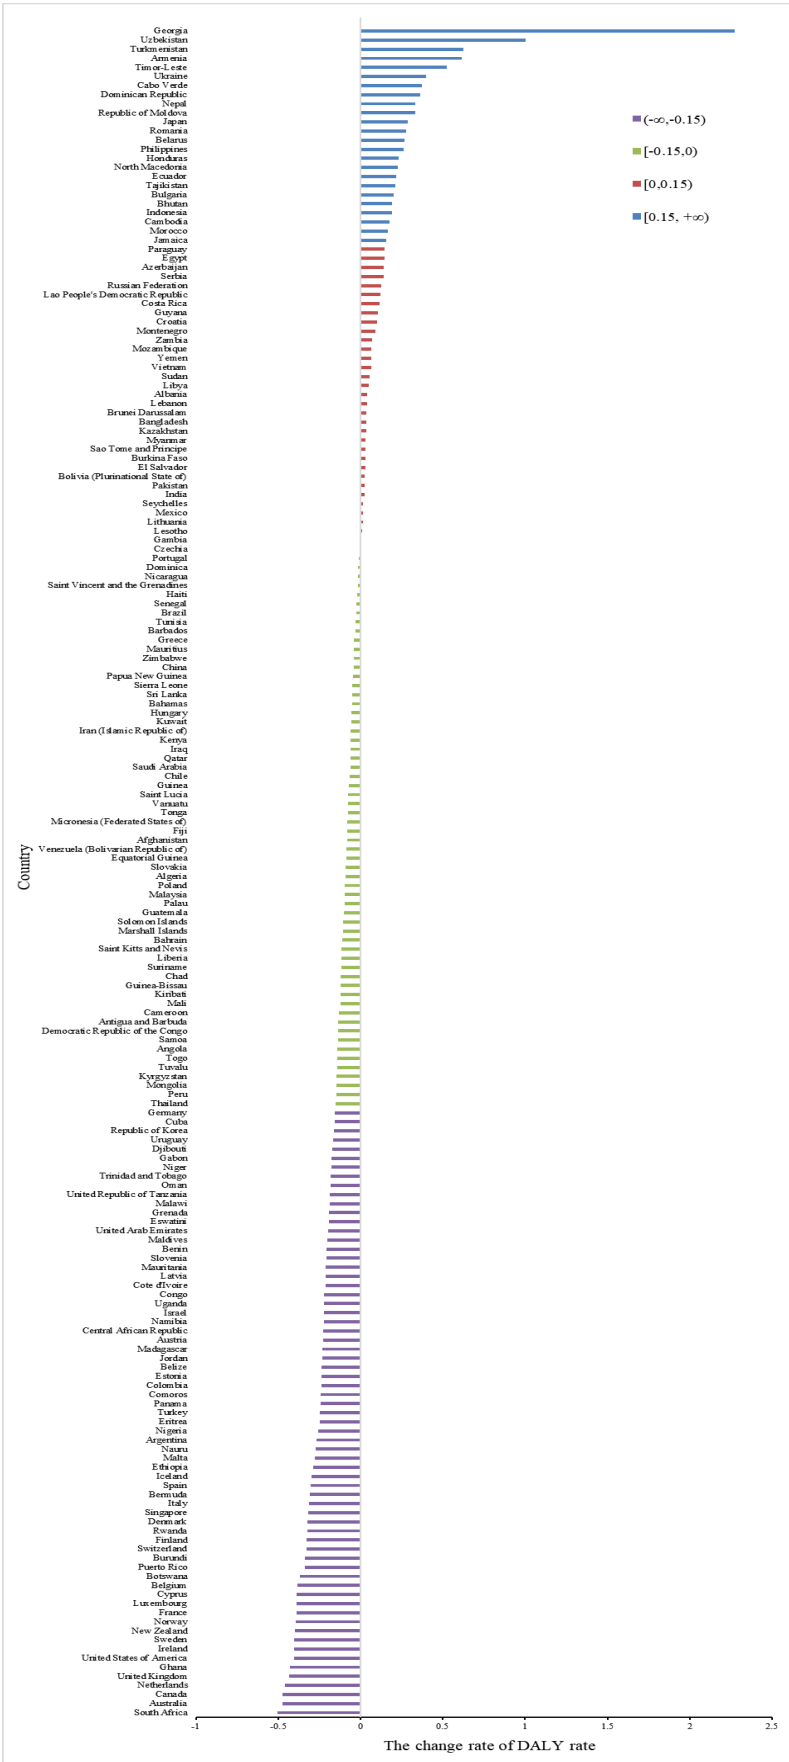

**Fig. S9 The change rate of age-standardized DALY rates for peripheral artery disease from 2000 to 2019**

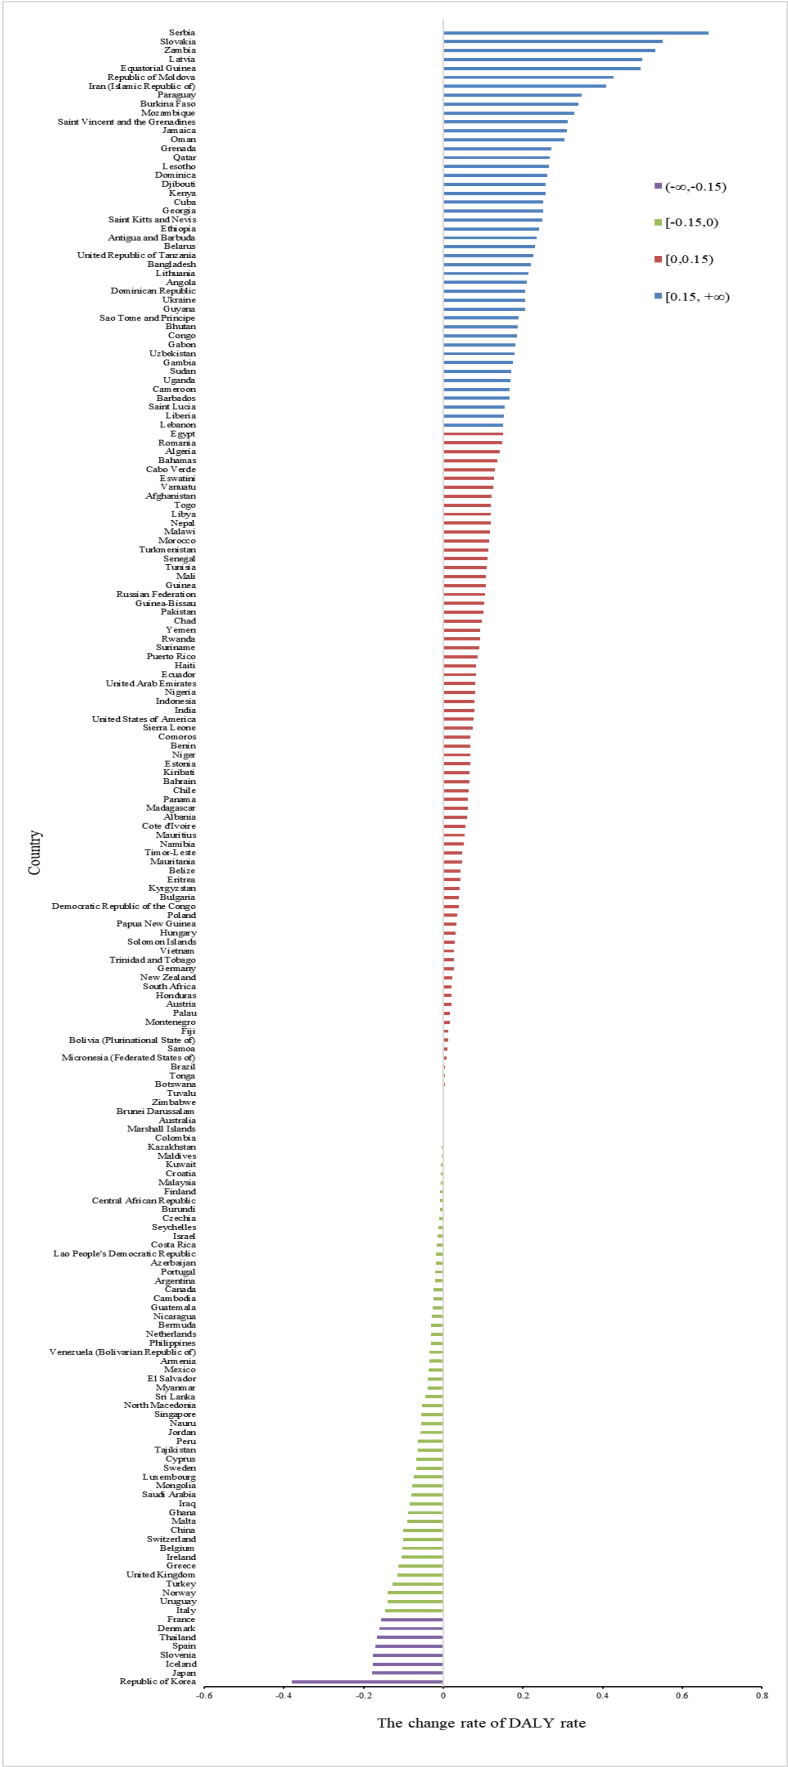

**Fig. S10 The change rate of age-standardized DALY rates for endocarditis from 2000 to 2019**

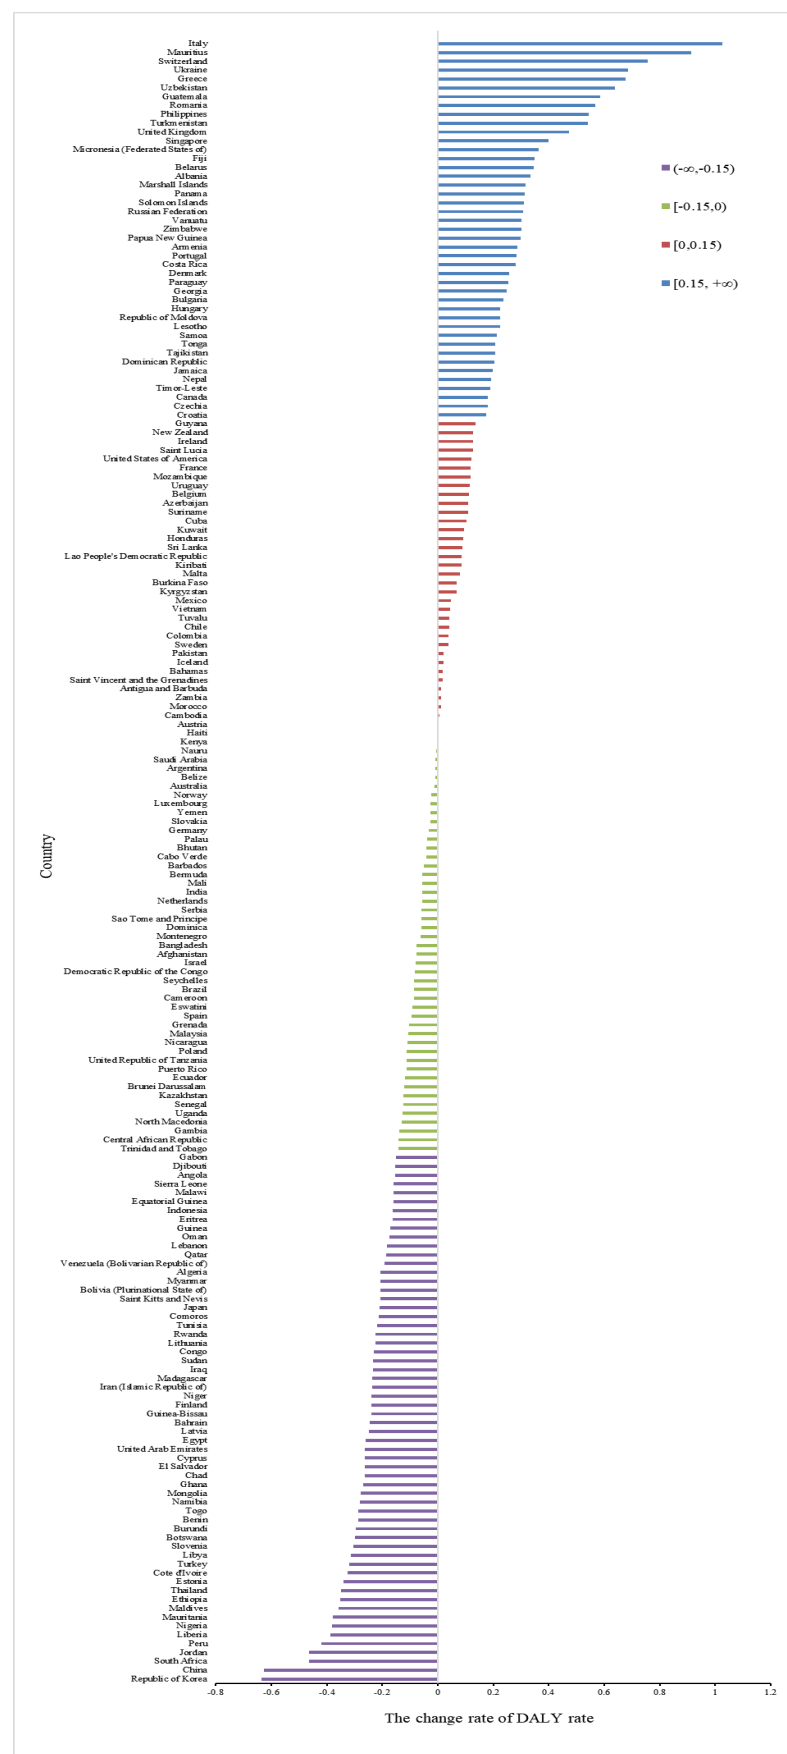

**Fig. S11 The change rate of age-standardized DALY rates for other cardiovascular and circulatory diseases from 2000 to 2019**

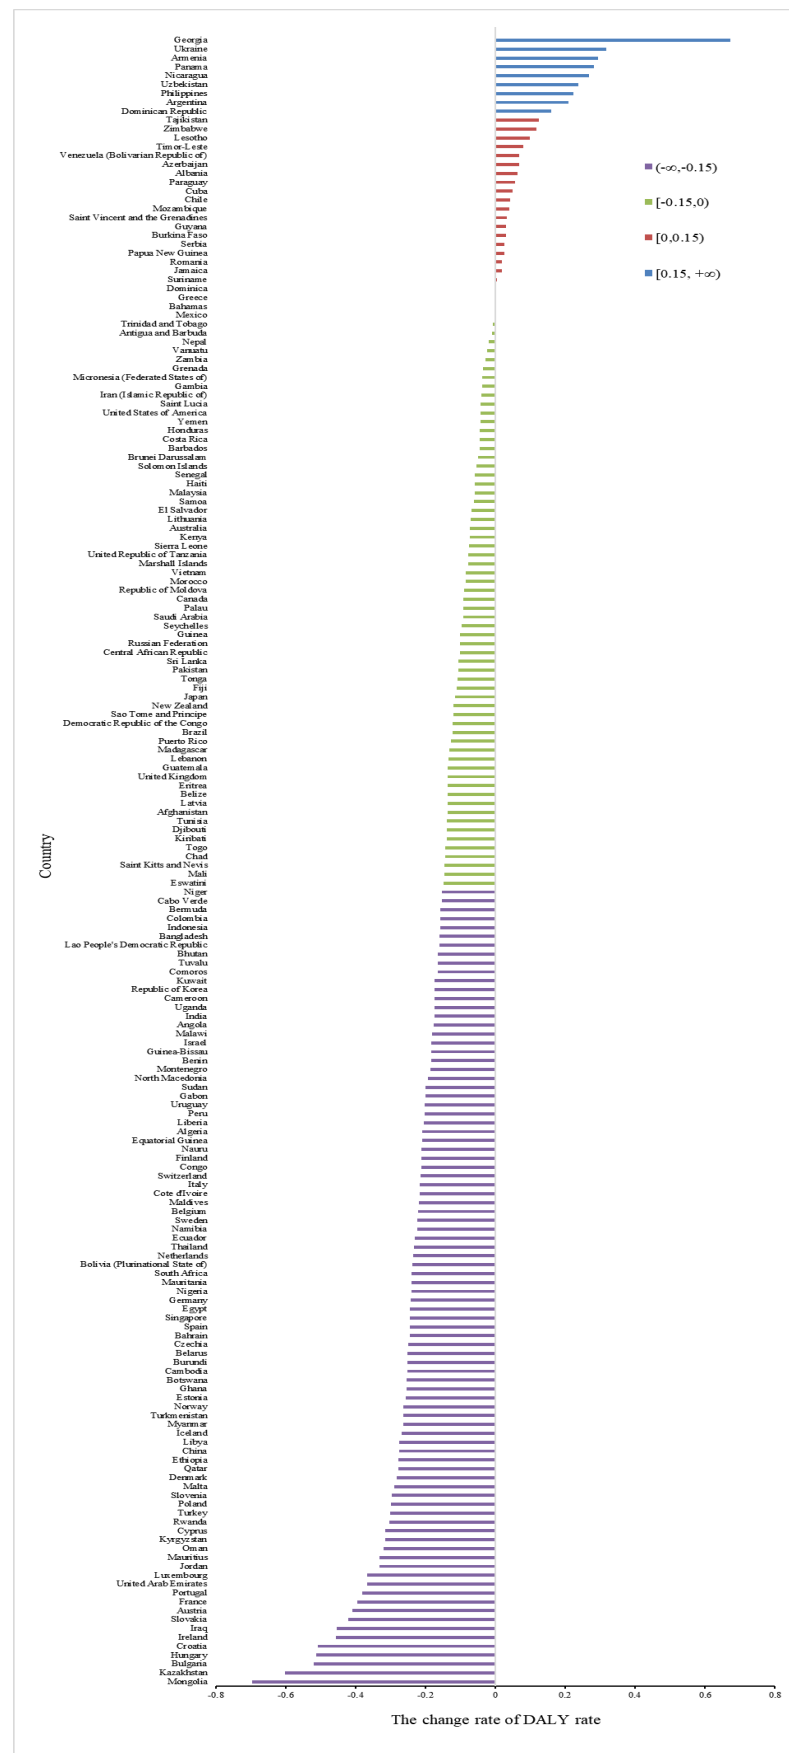

**Figs. S12-29 Concentration curves of age-standardized DALY rates for CVD from 2001 to 2018**

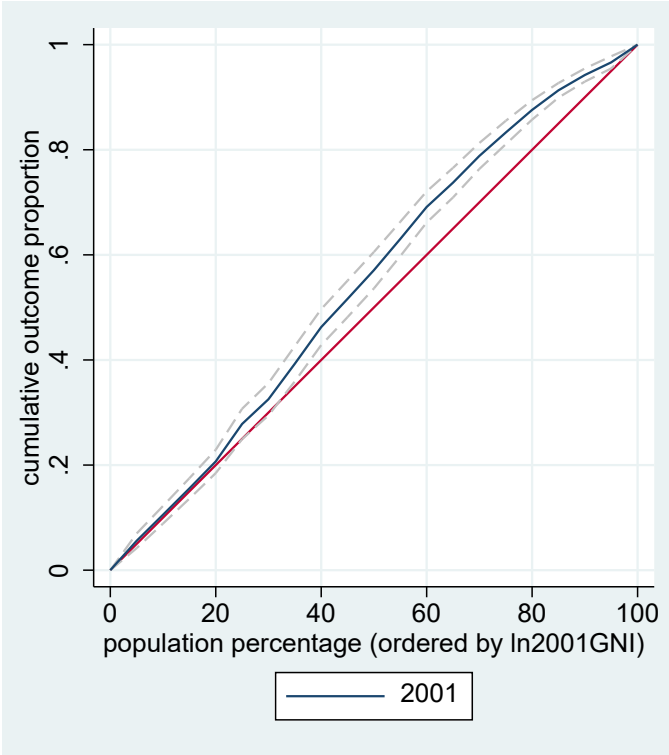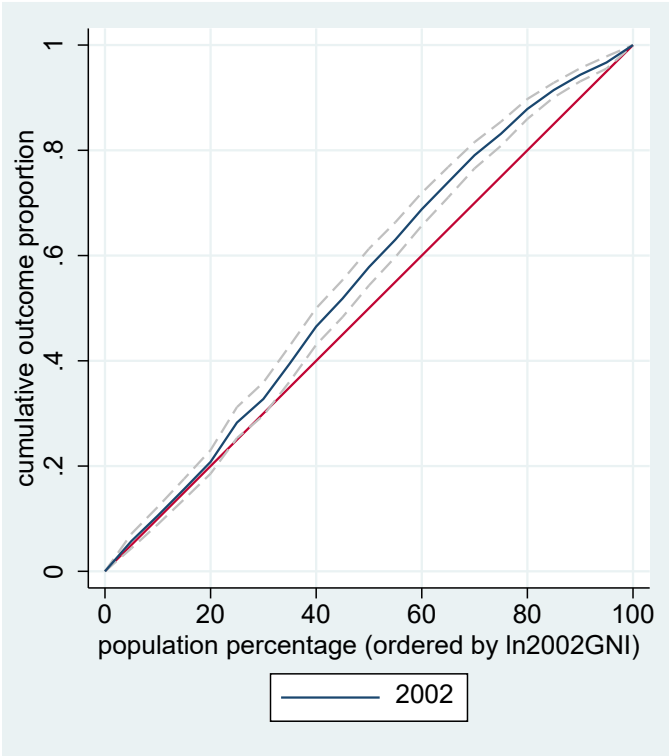

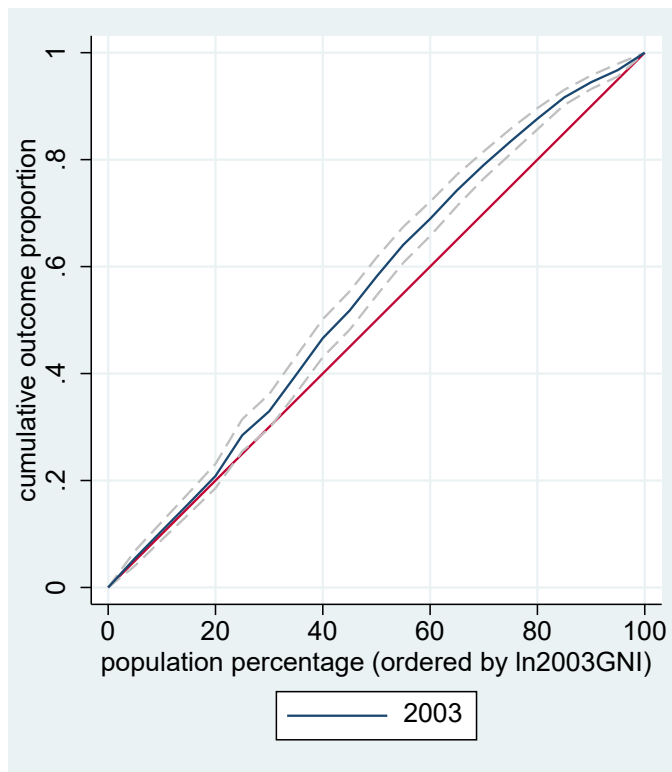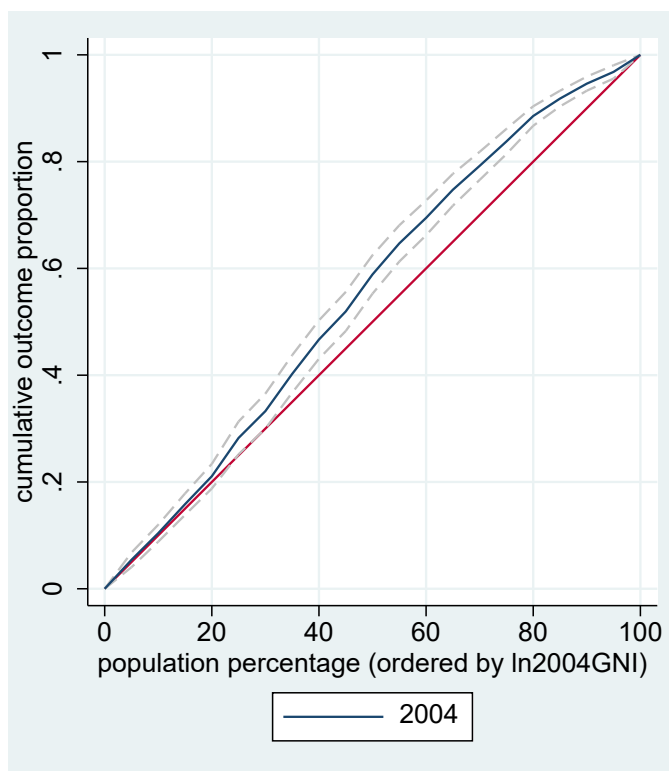

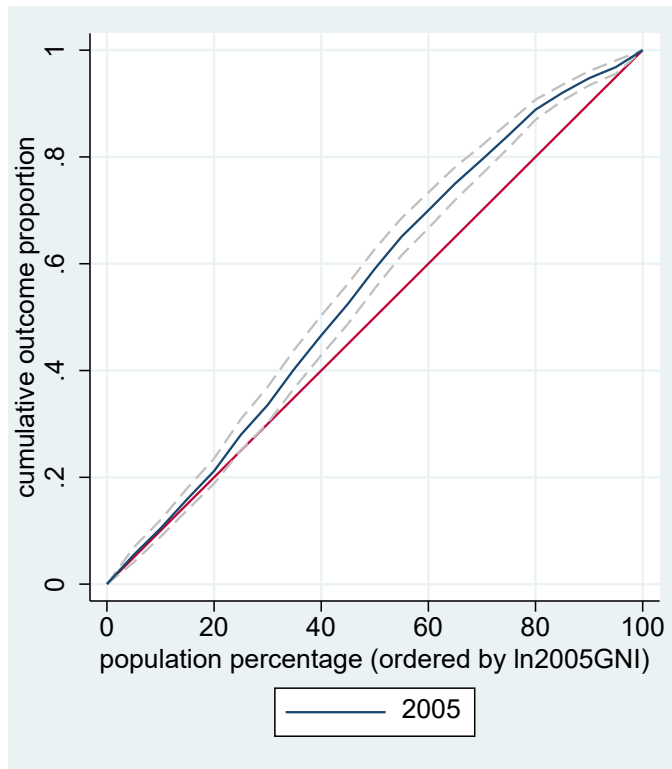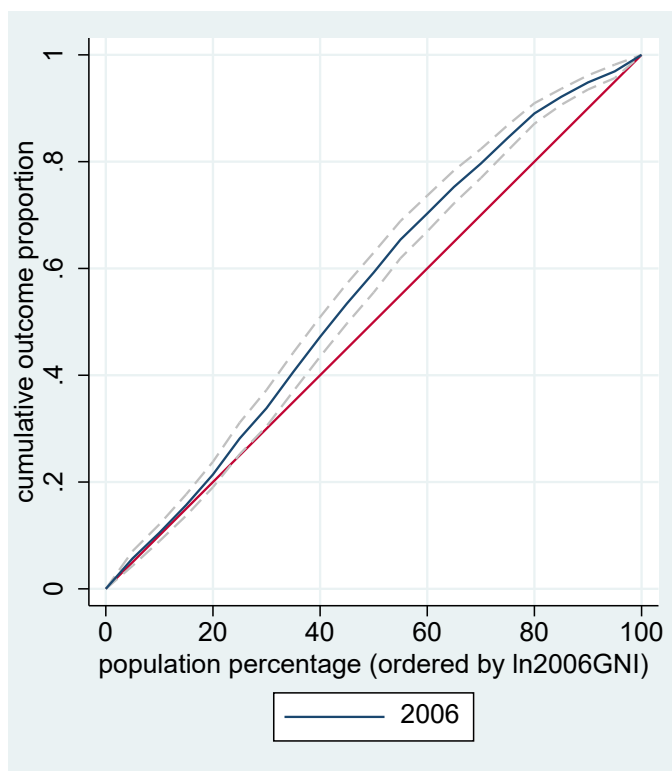

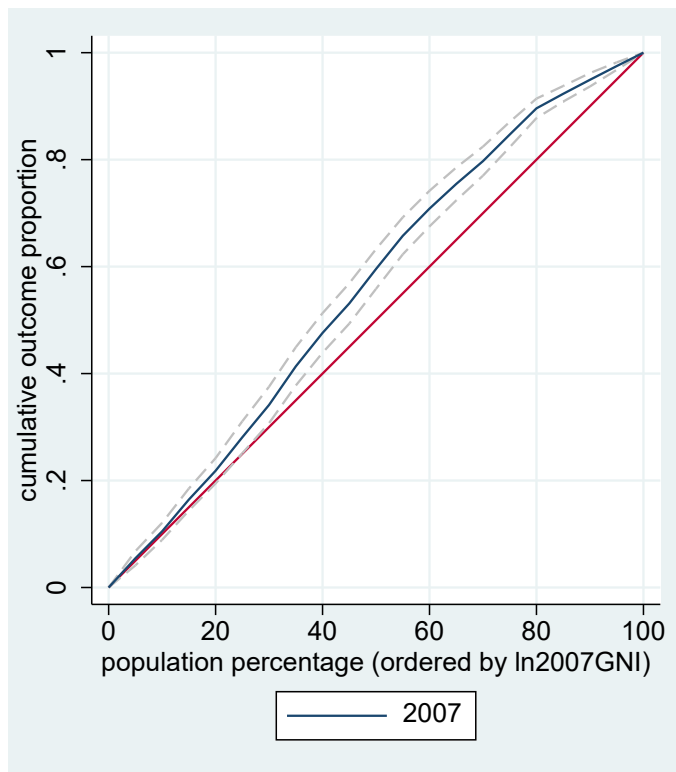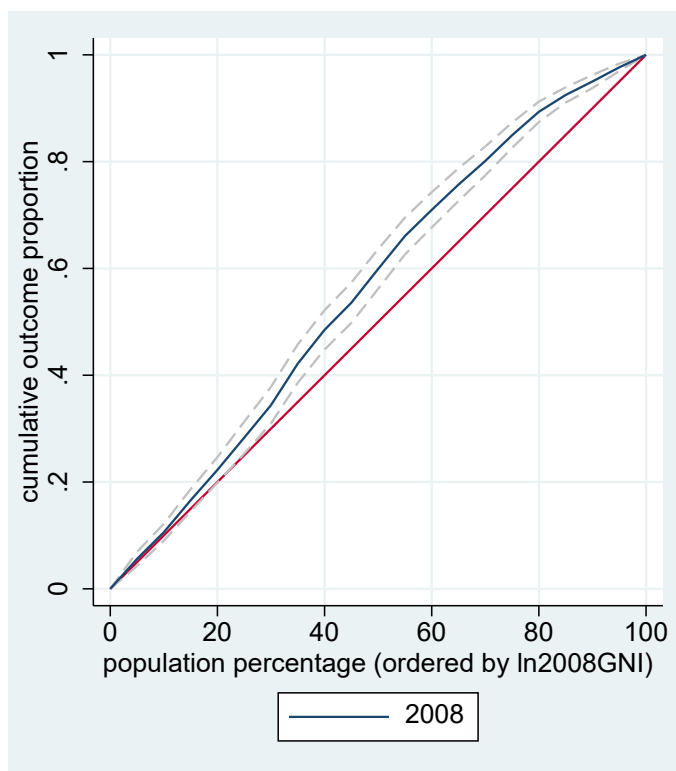

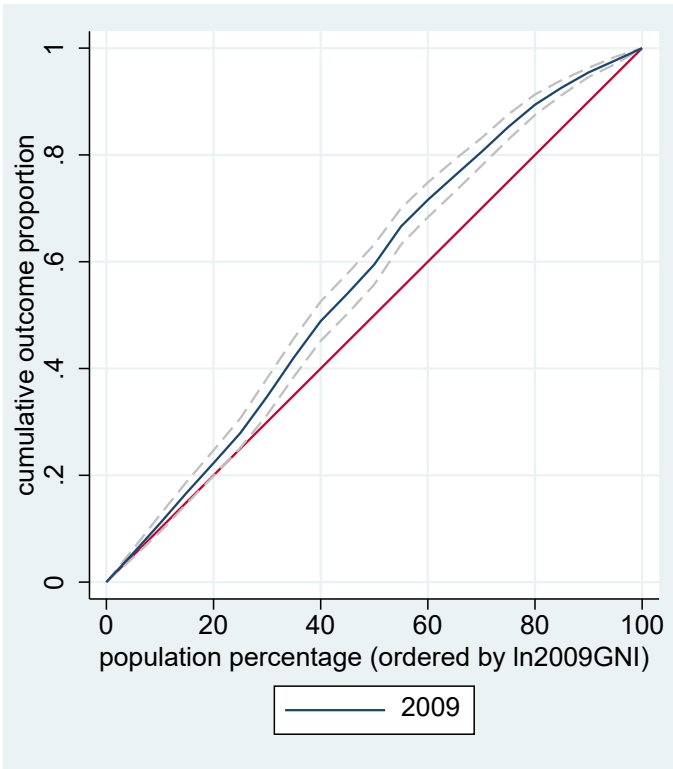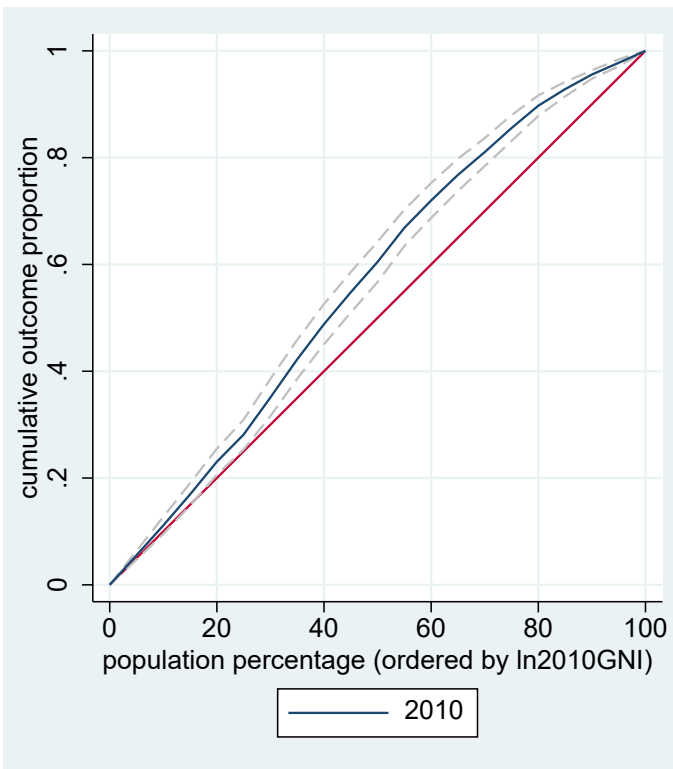

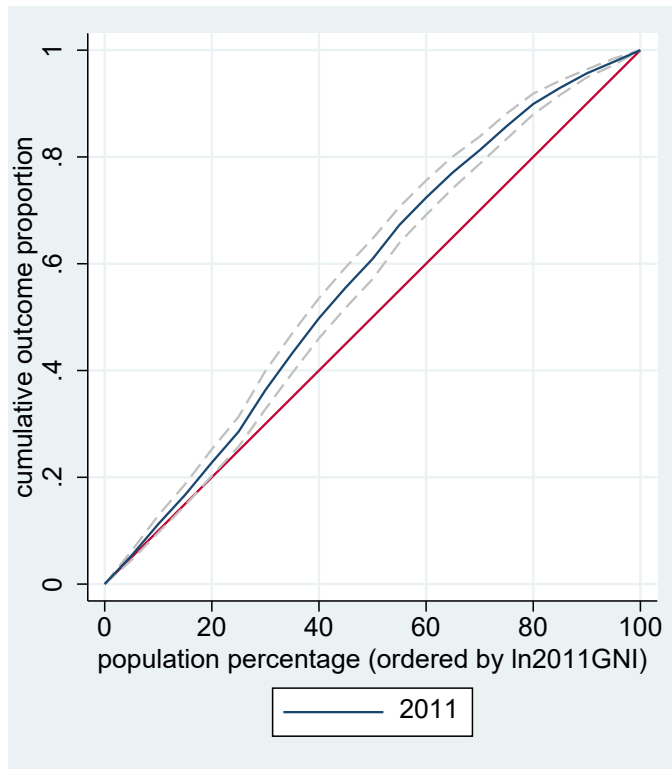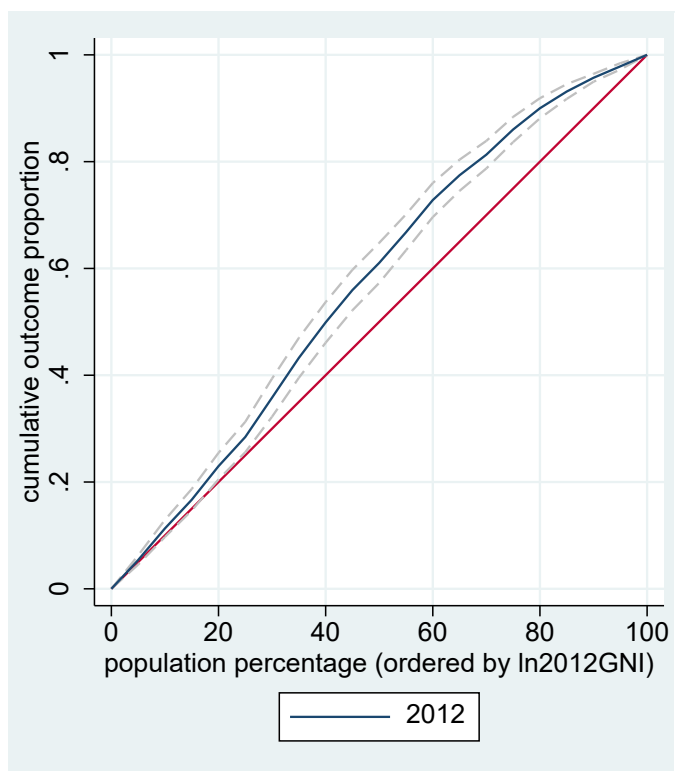

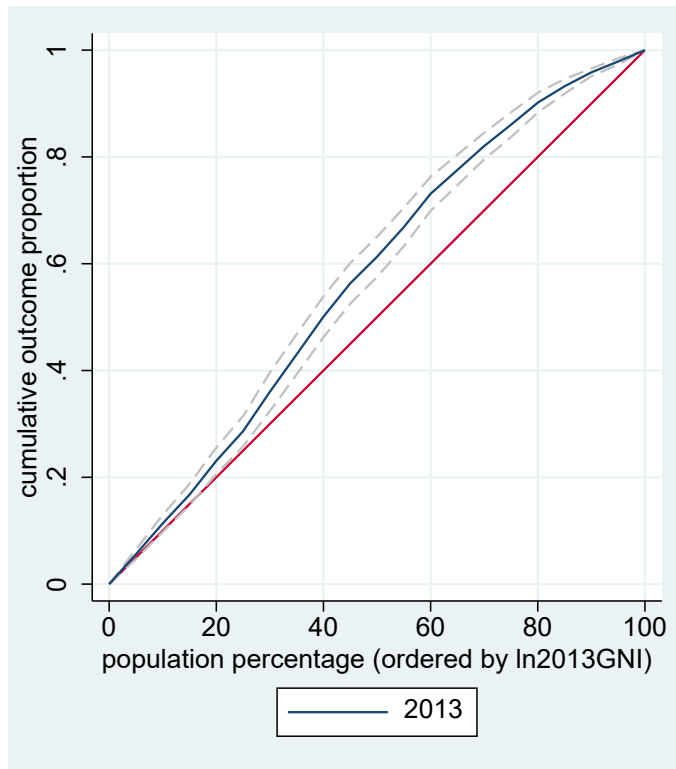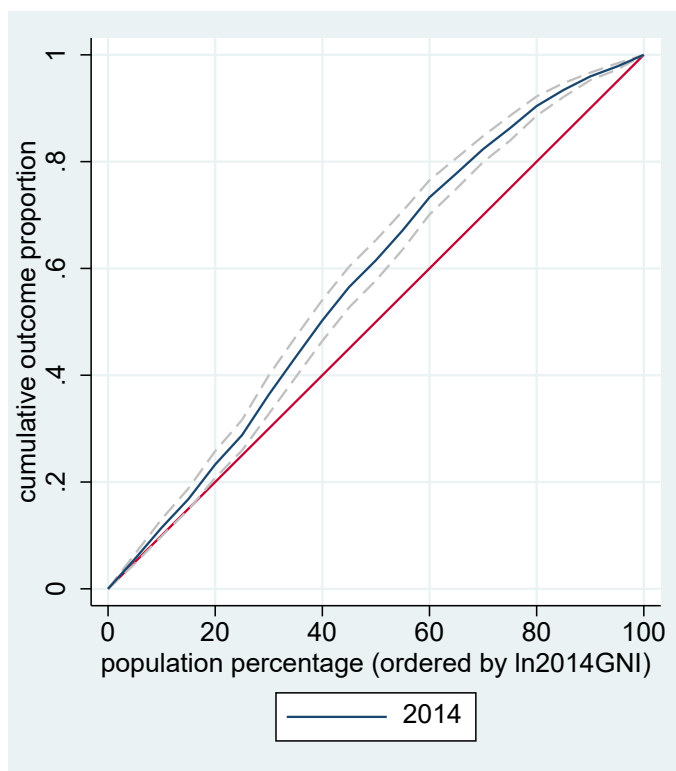

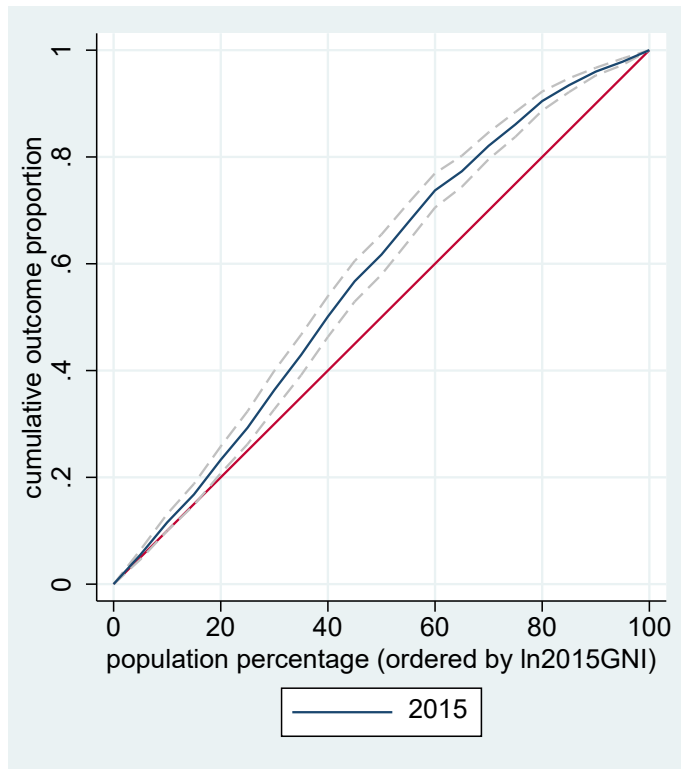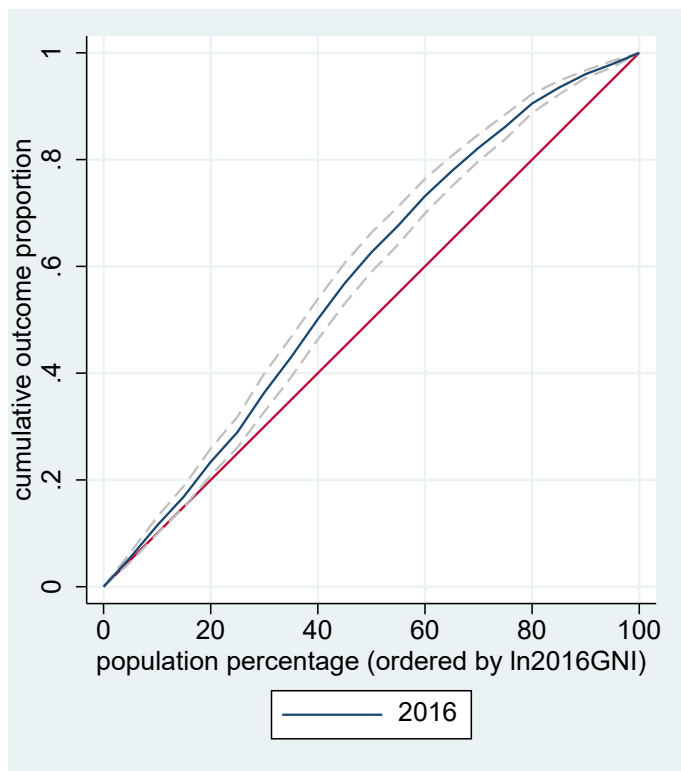

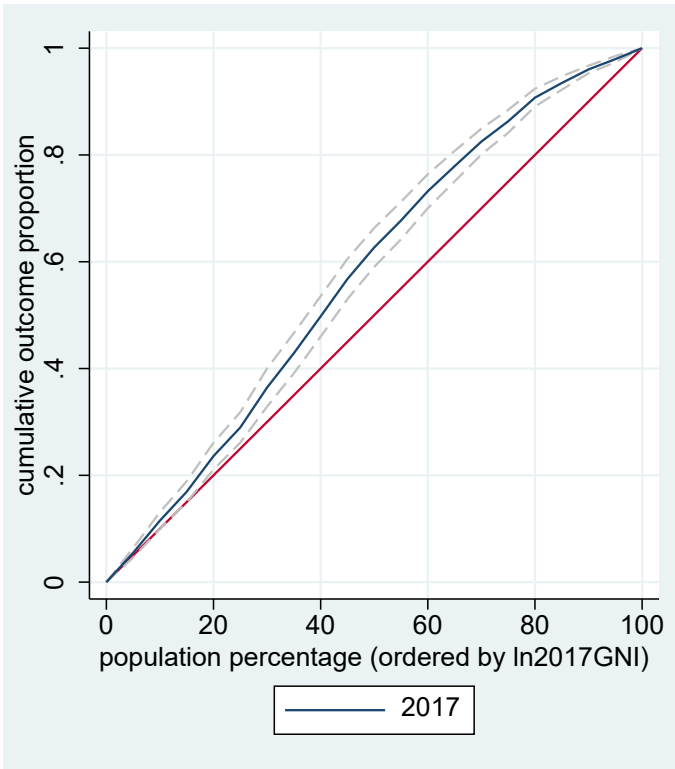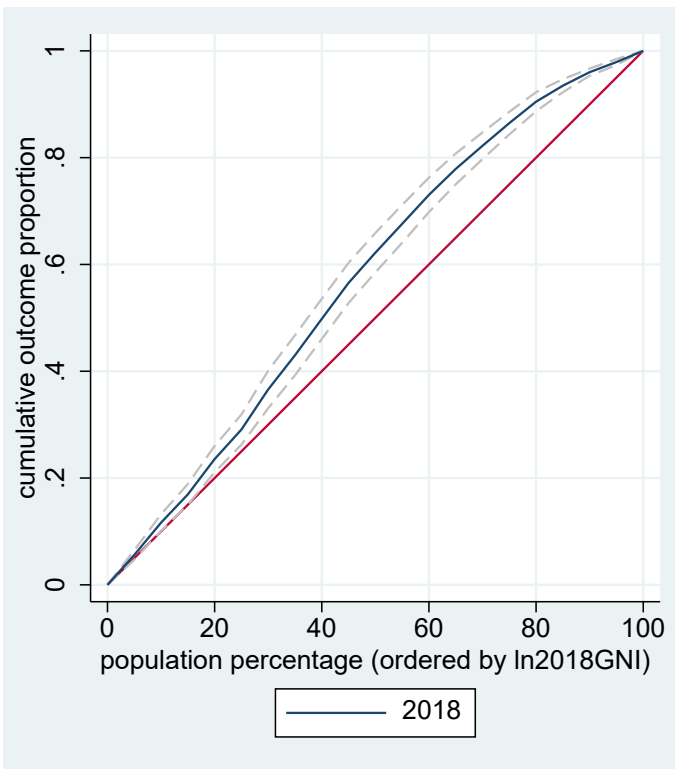

**Figs. S30-47 Concentration curves of age-standardized DALY rates for rheumatic heart disease from 2001 to 2018**

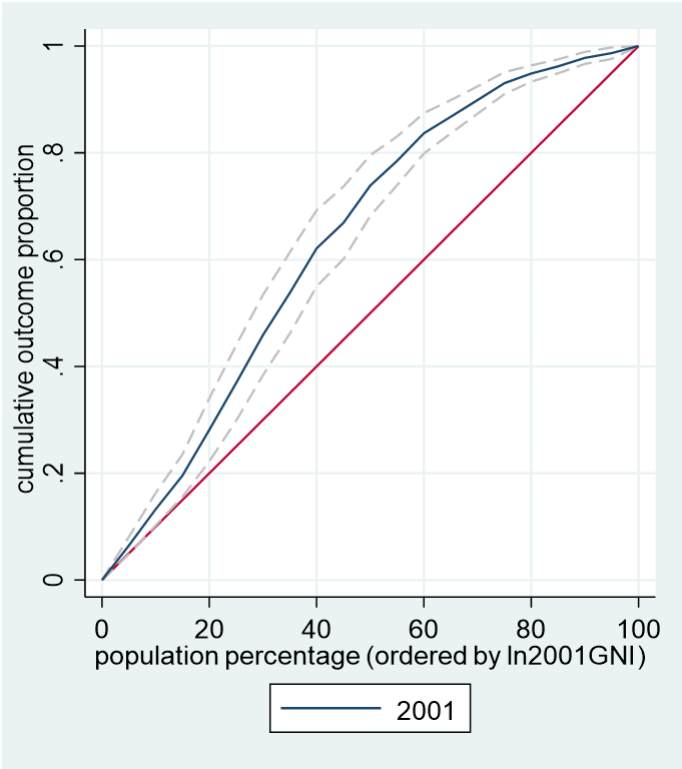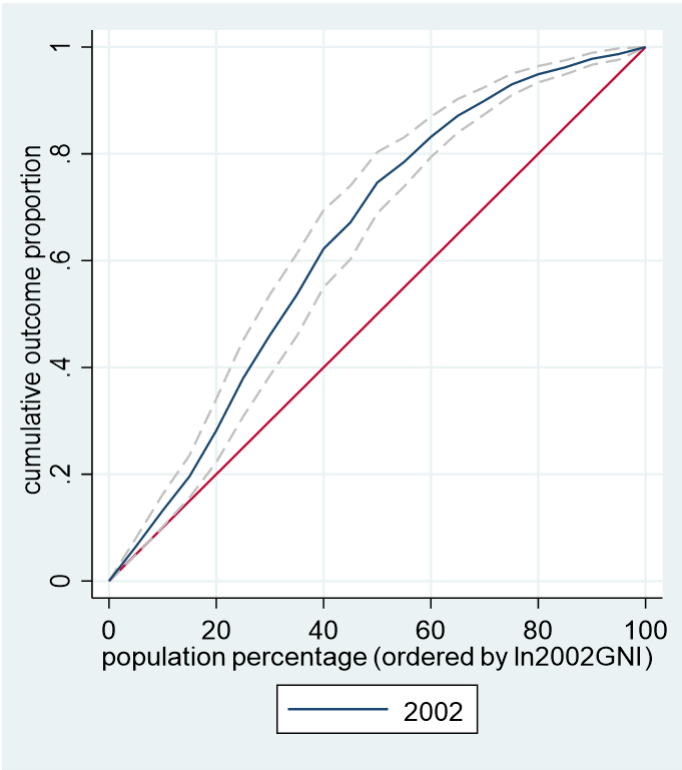

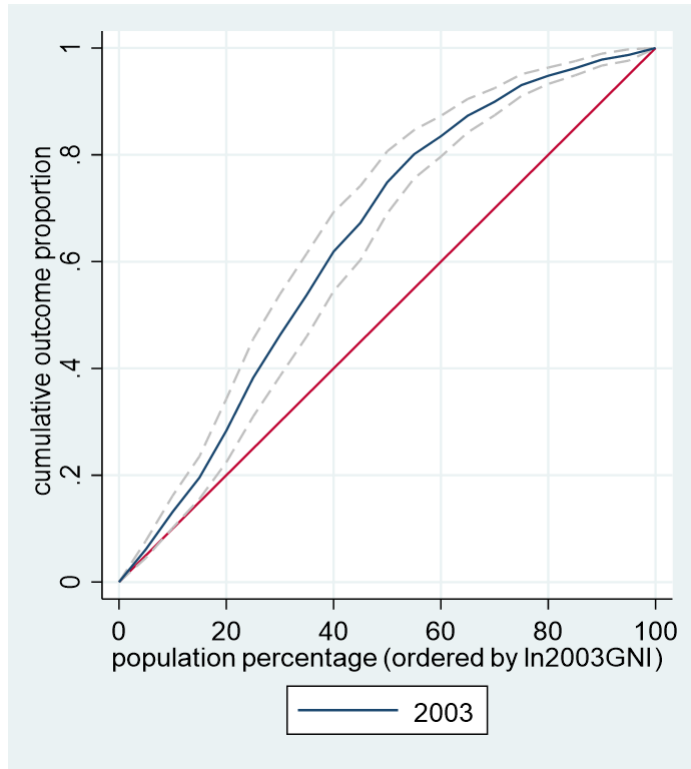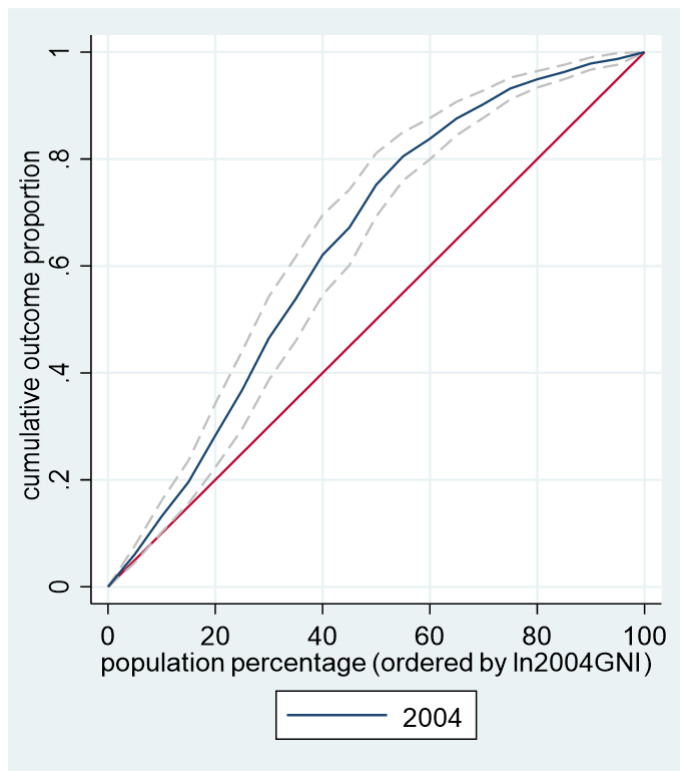

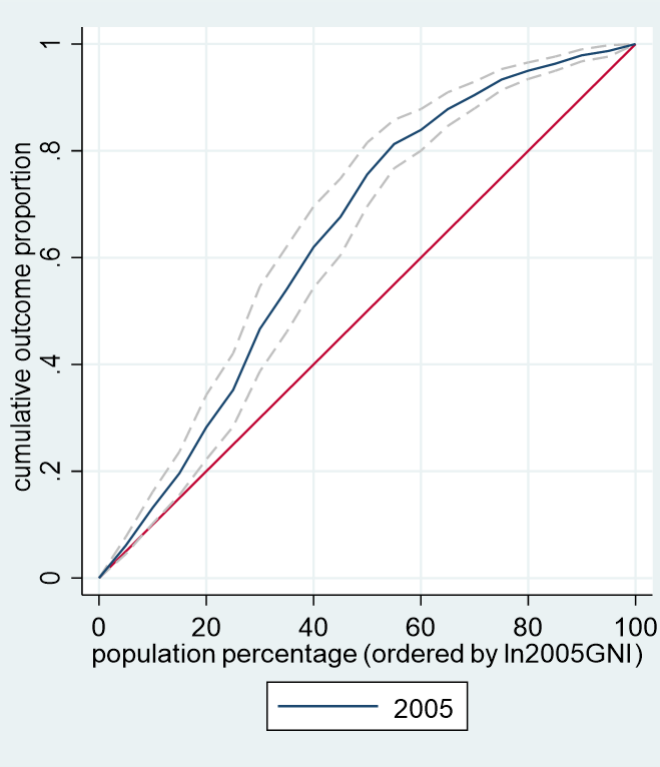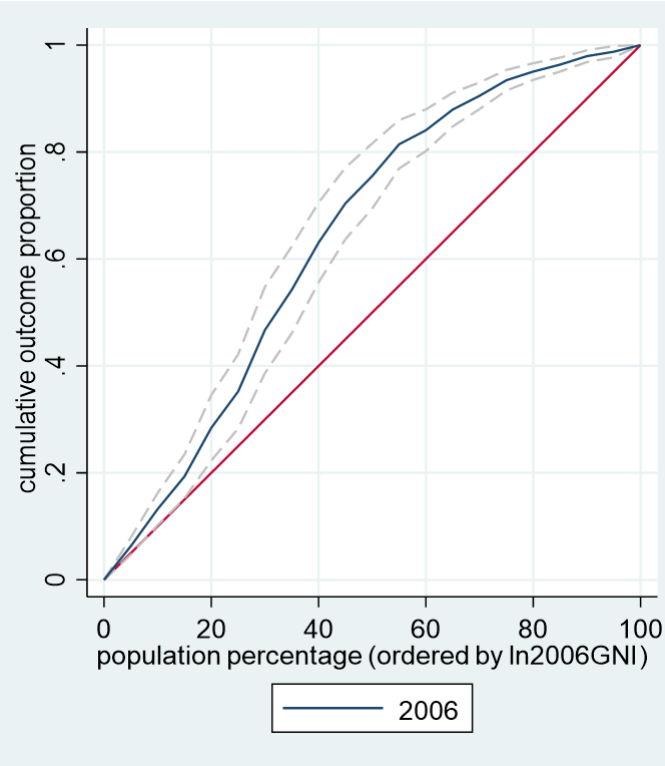

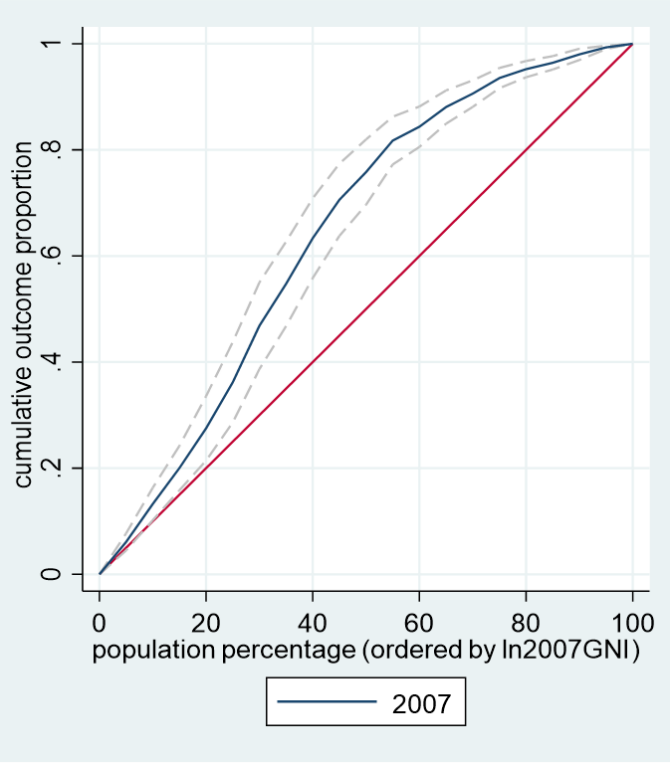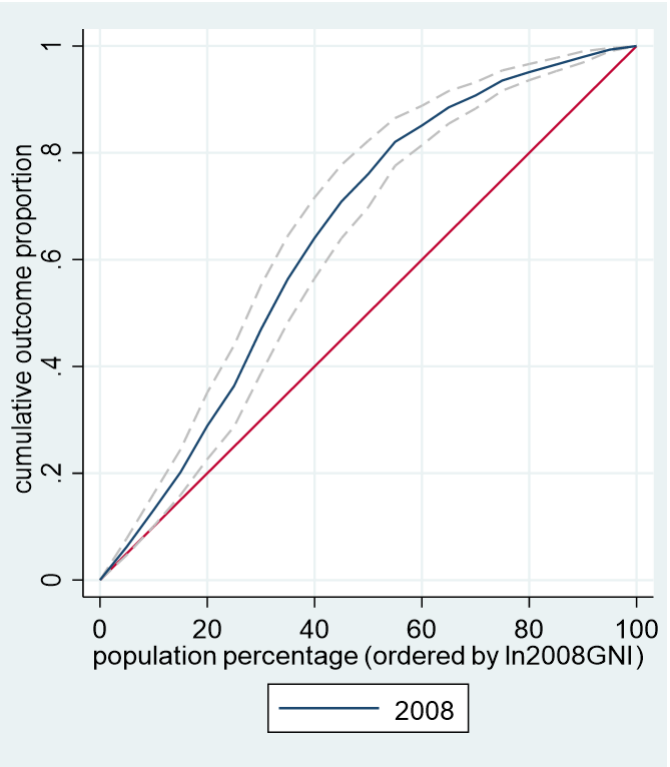

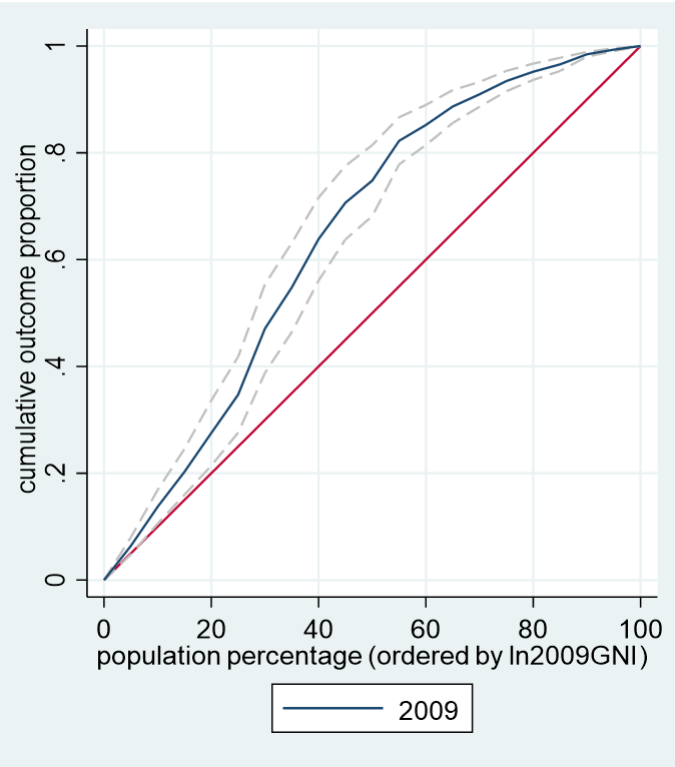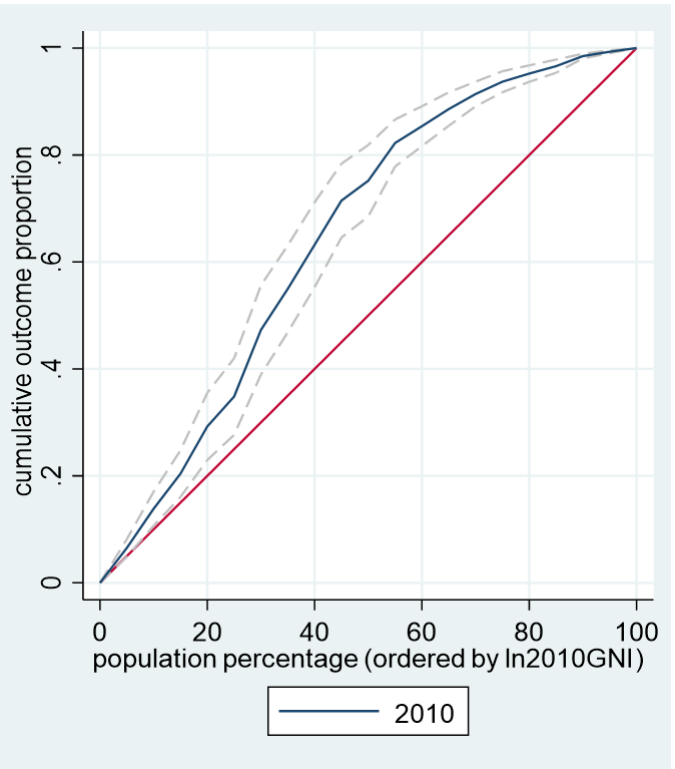

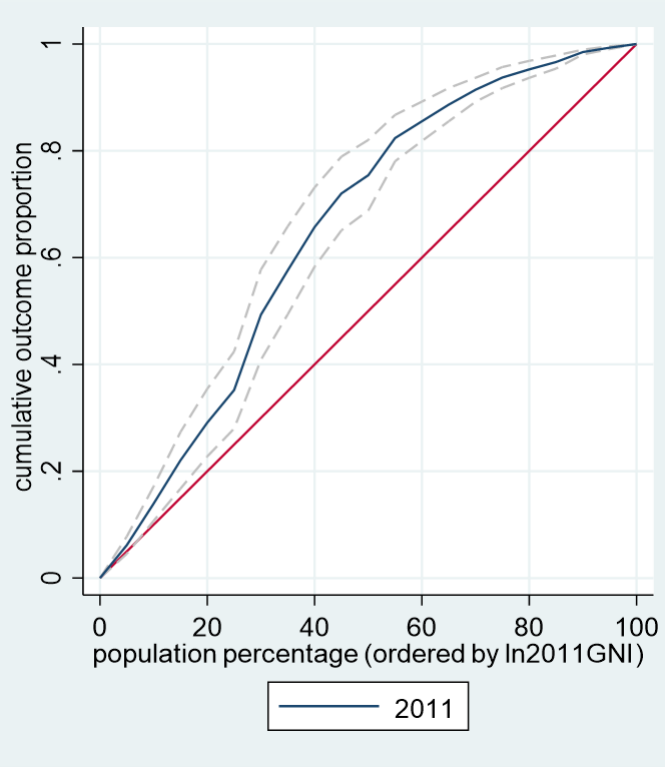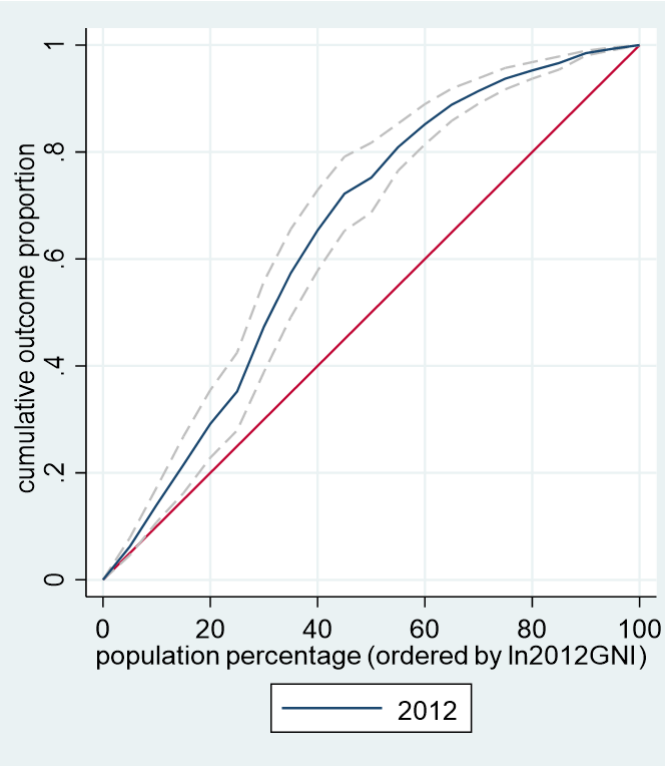

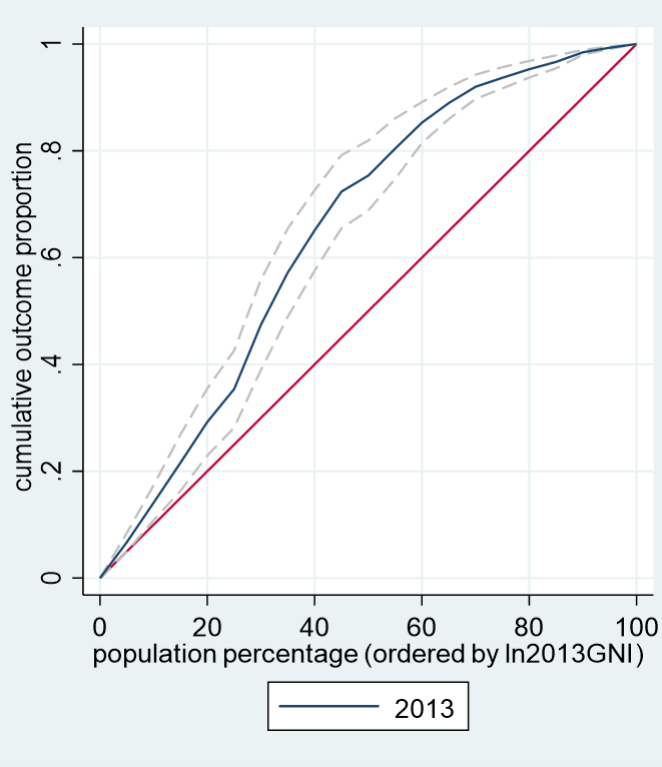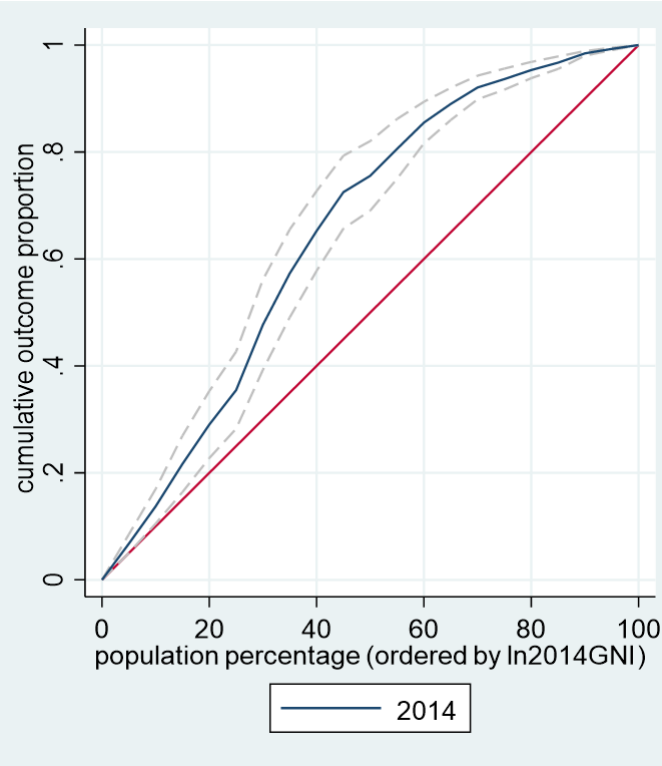

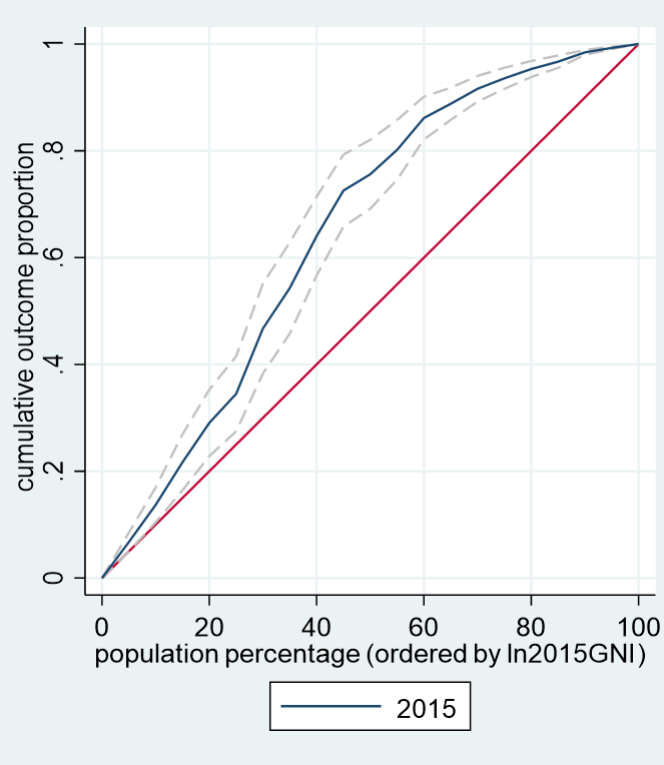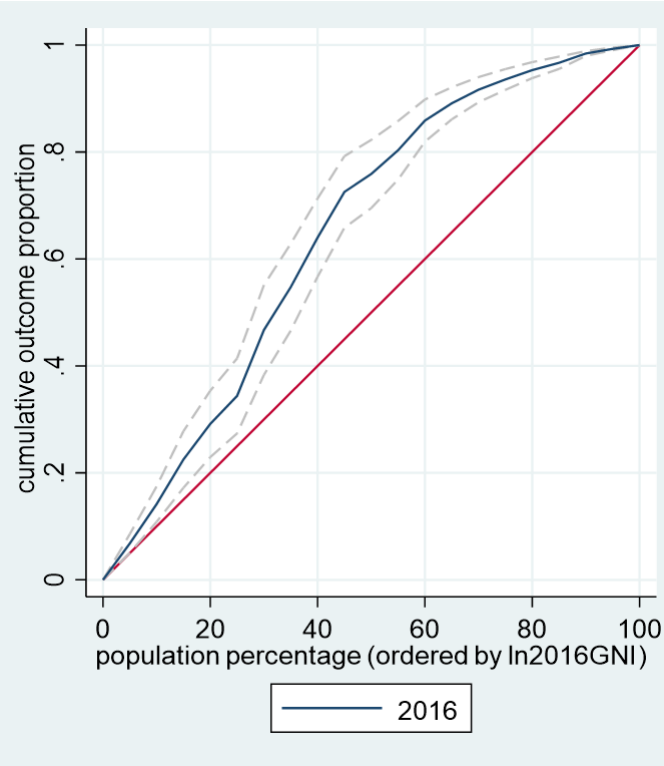

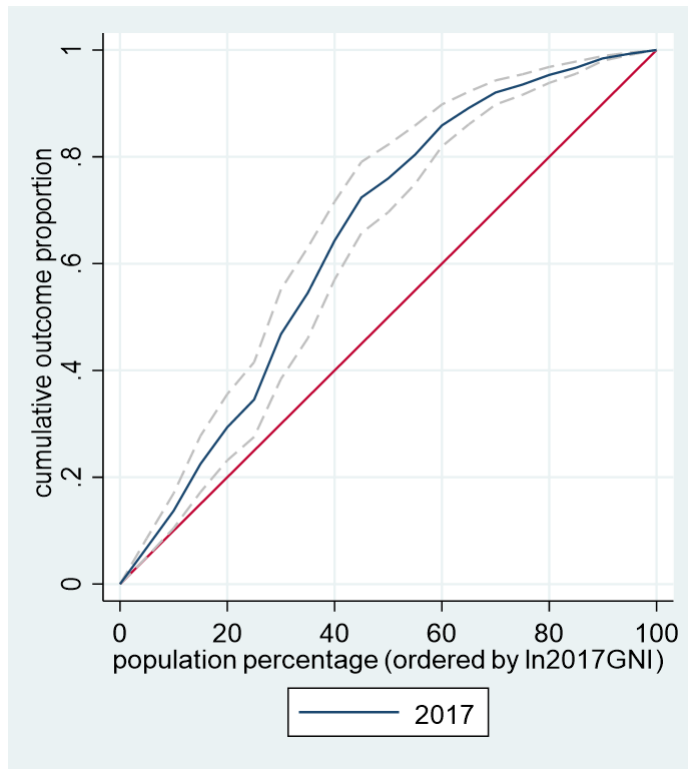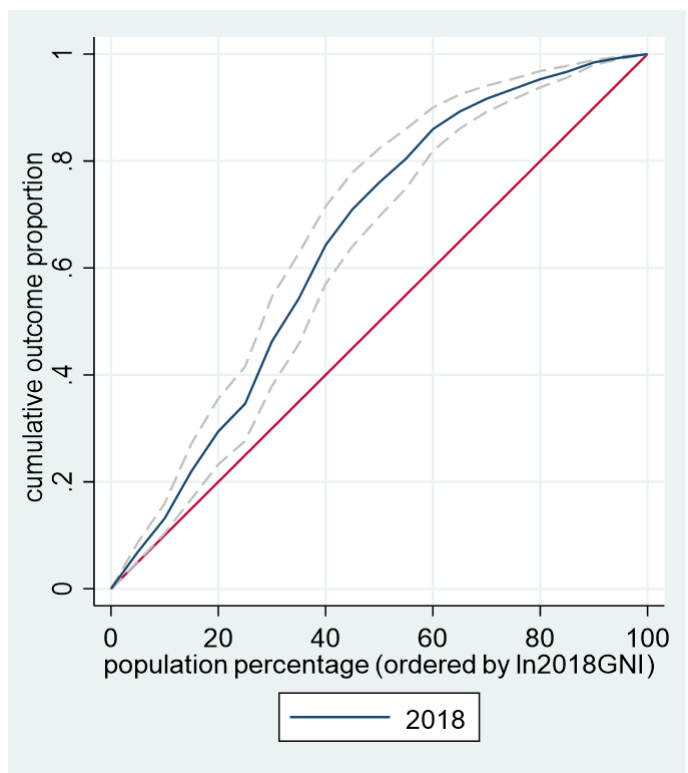

**Figs. S48-65 Concentration curves of age-standardized DALY rates for ischemic heart disease from 2001 to 2018**

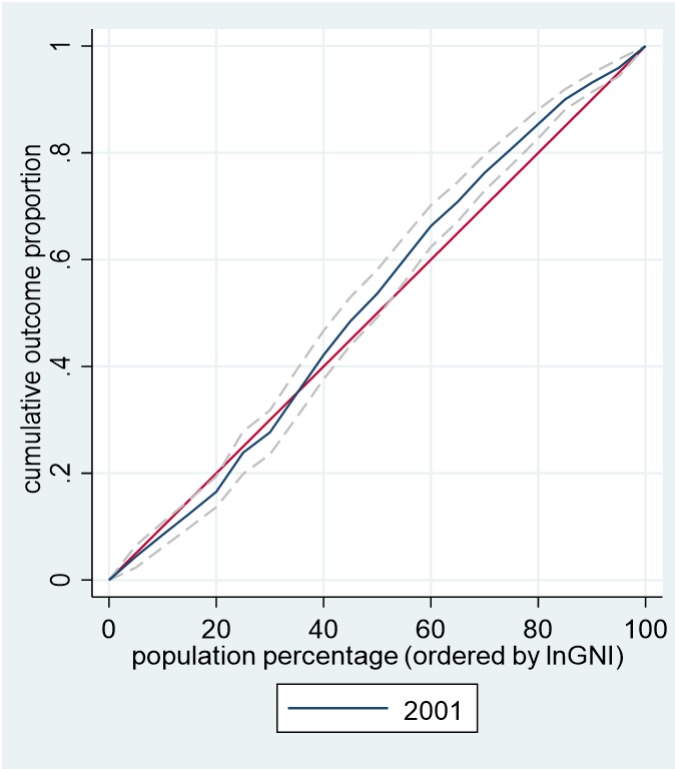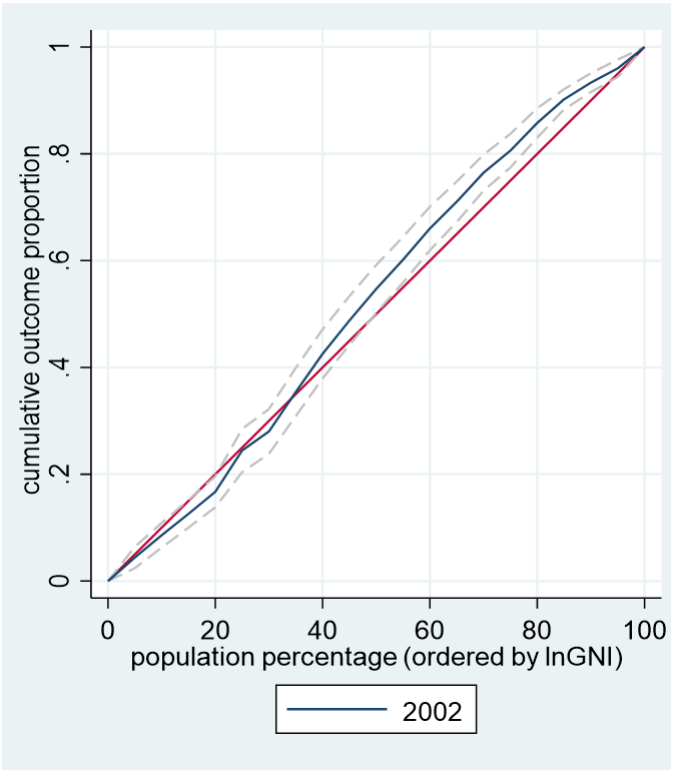

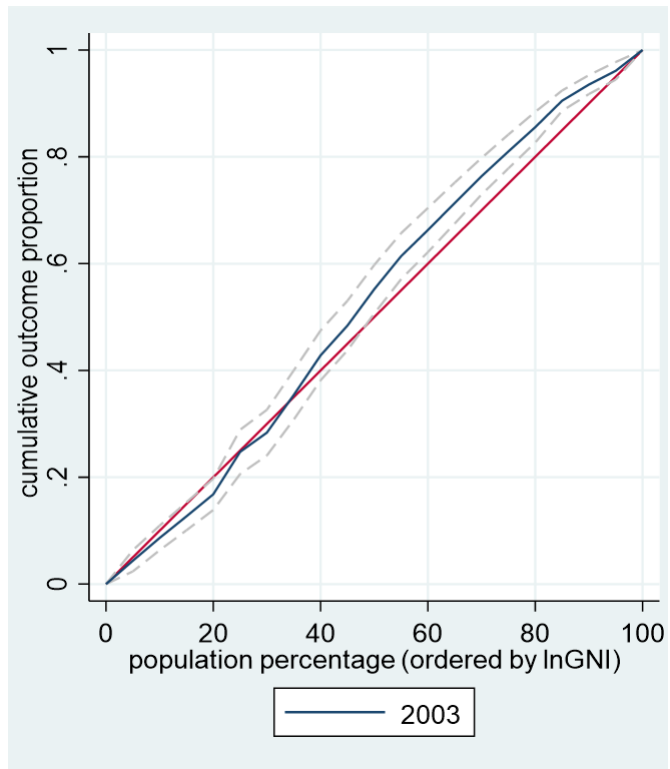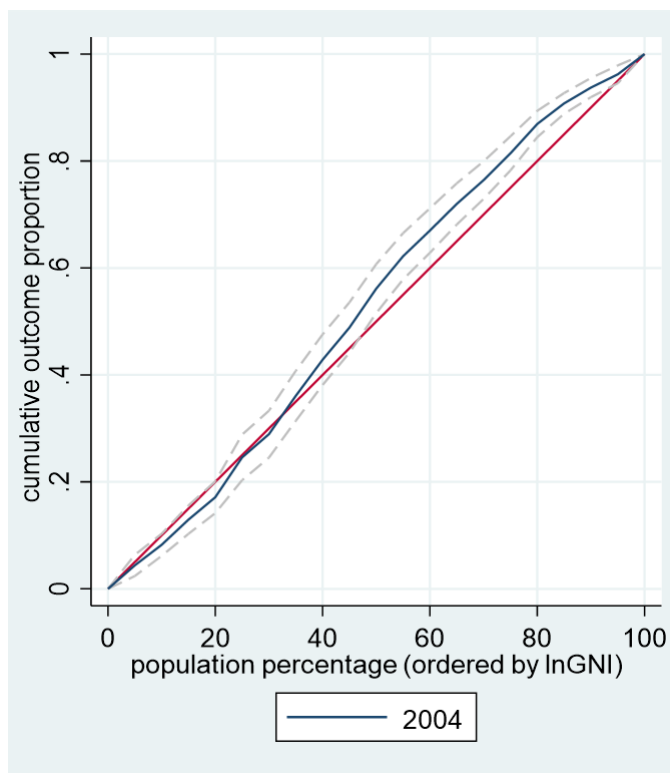

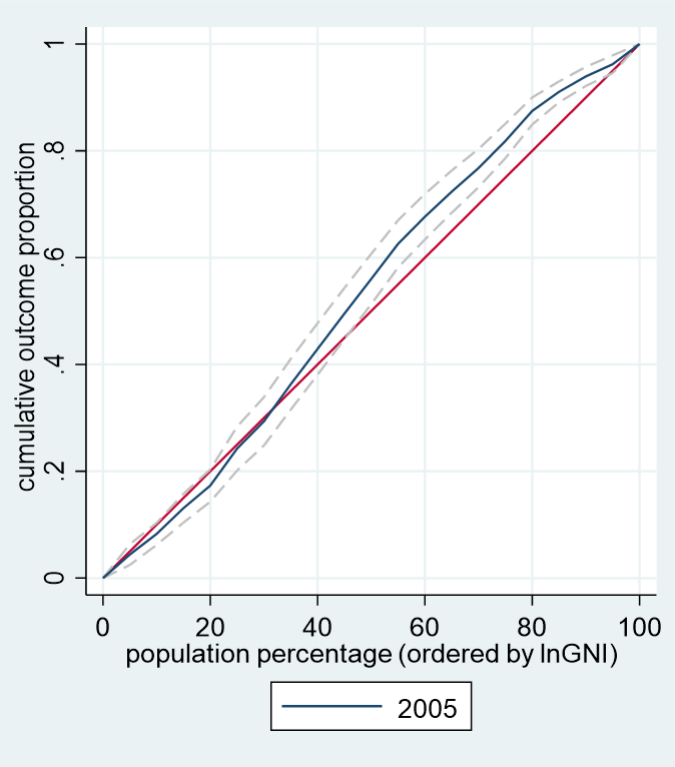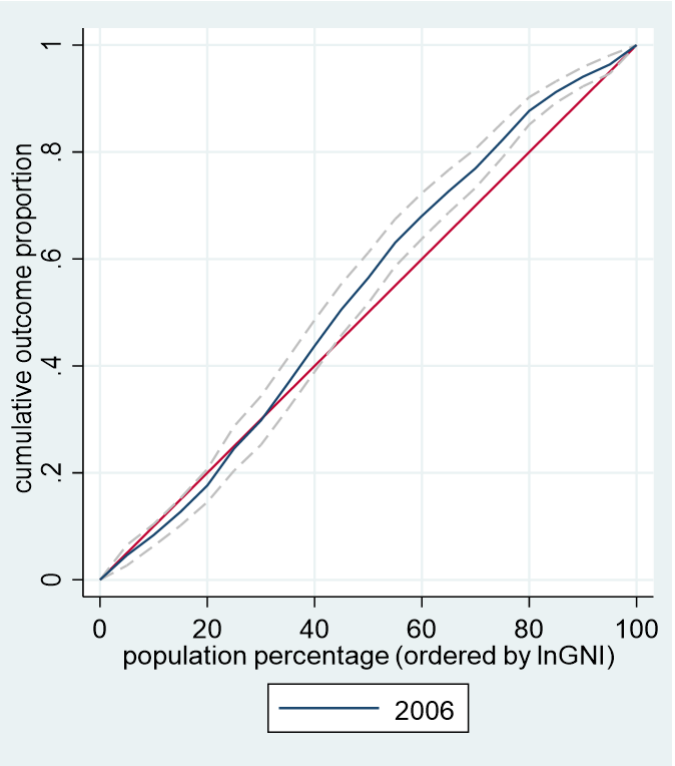

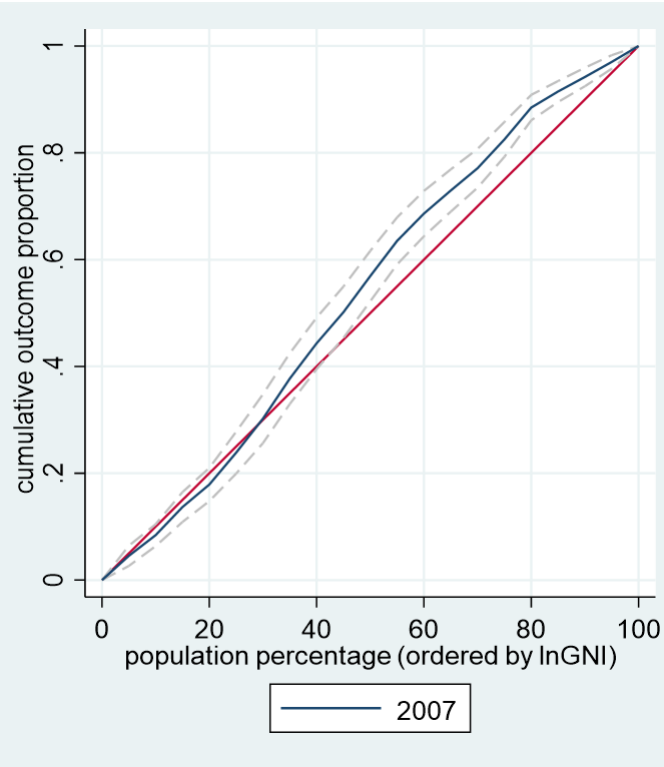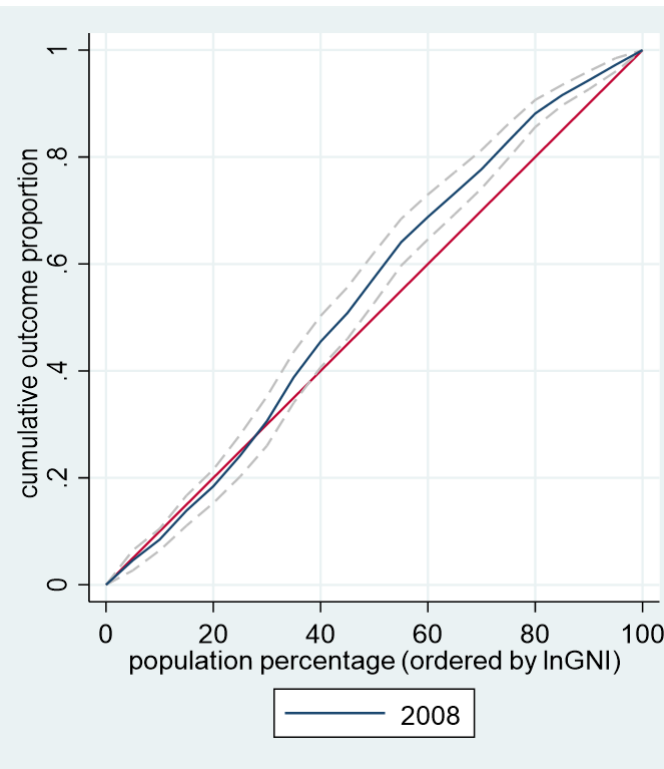

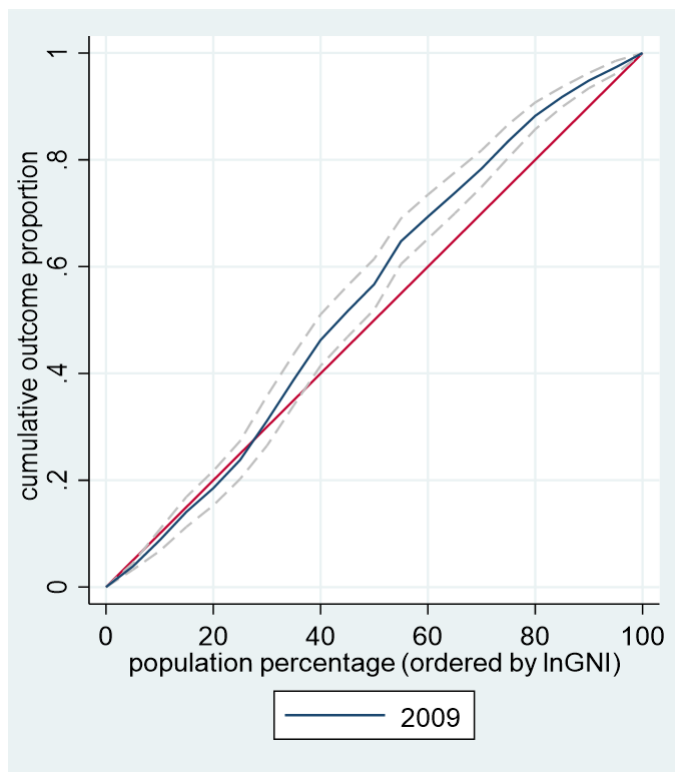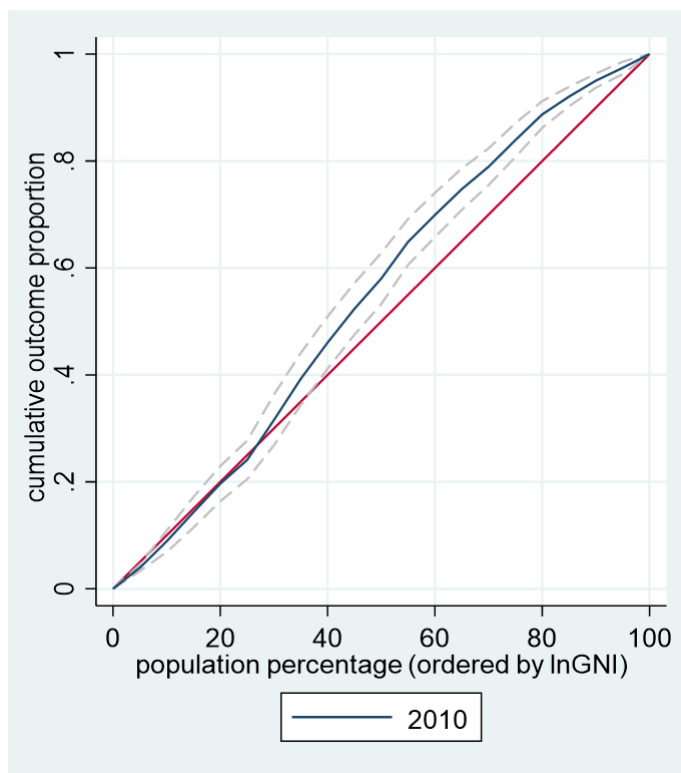

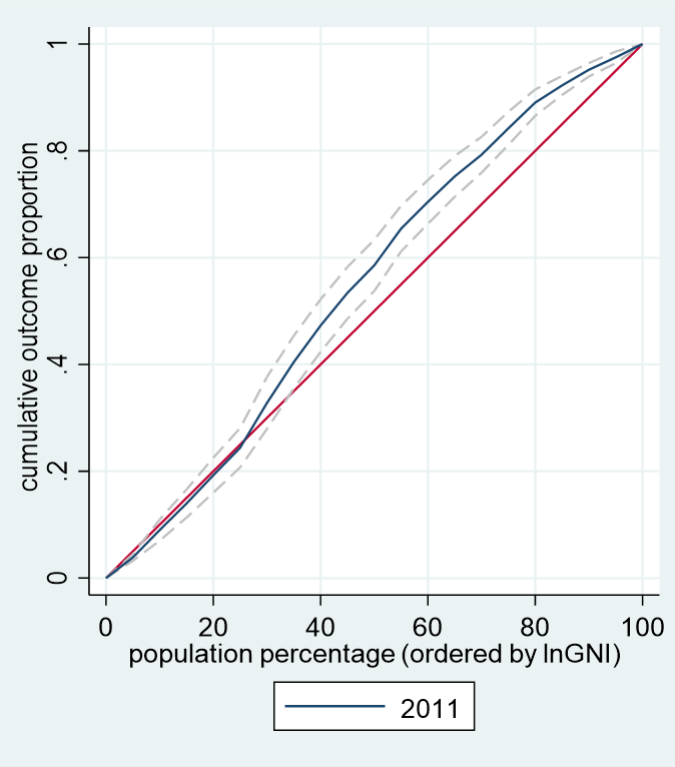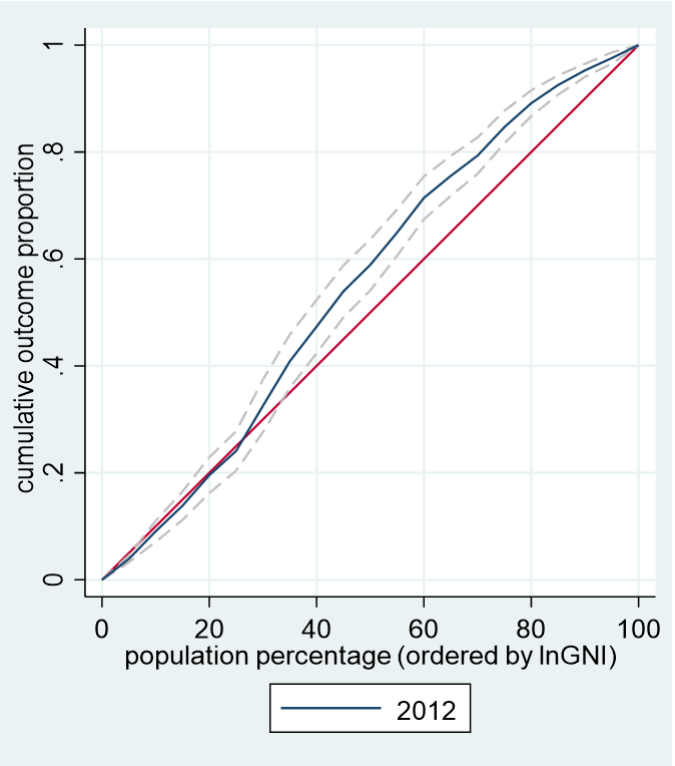

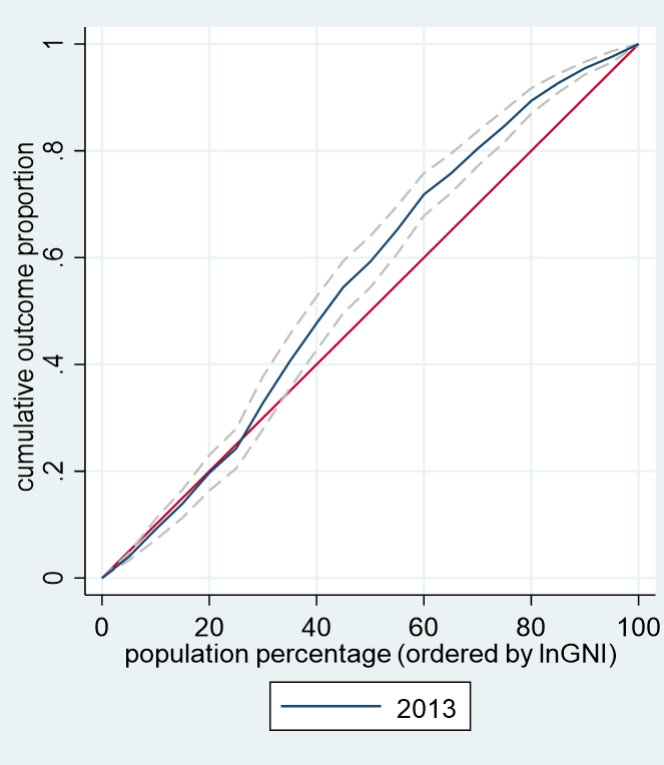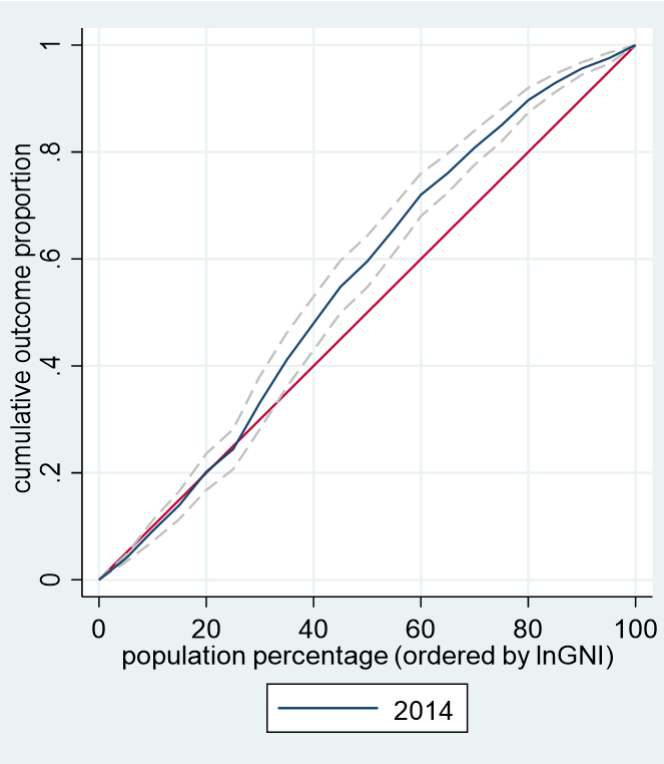

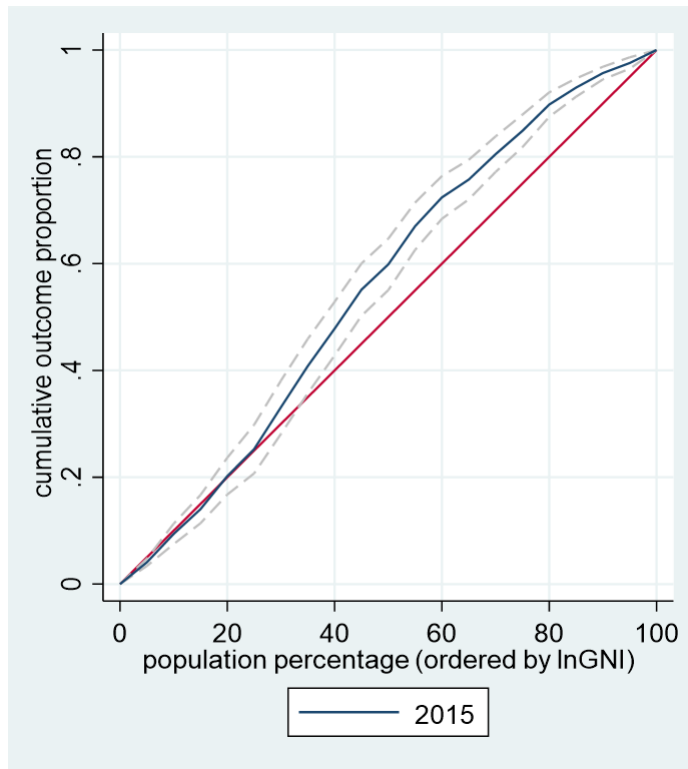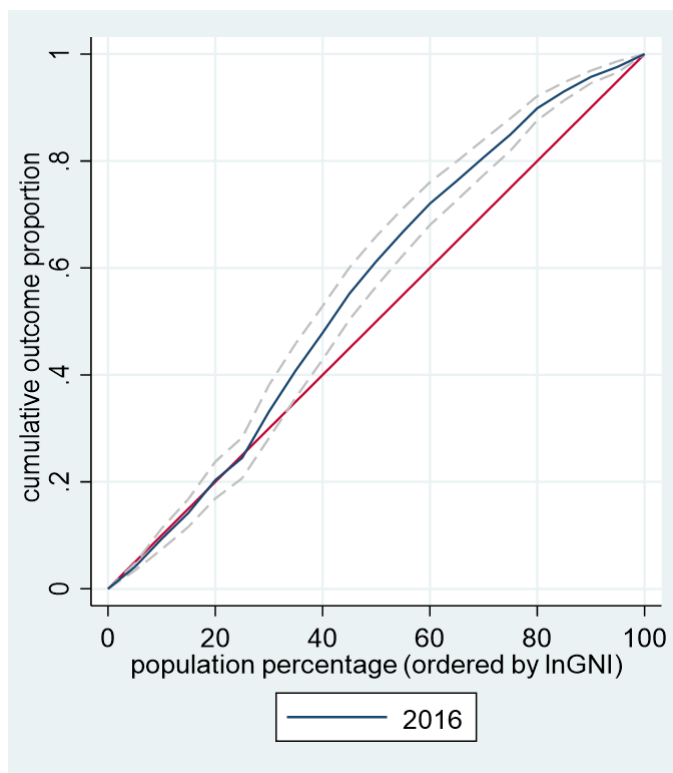

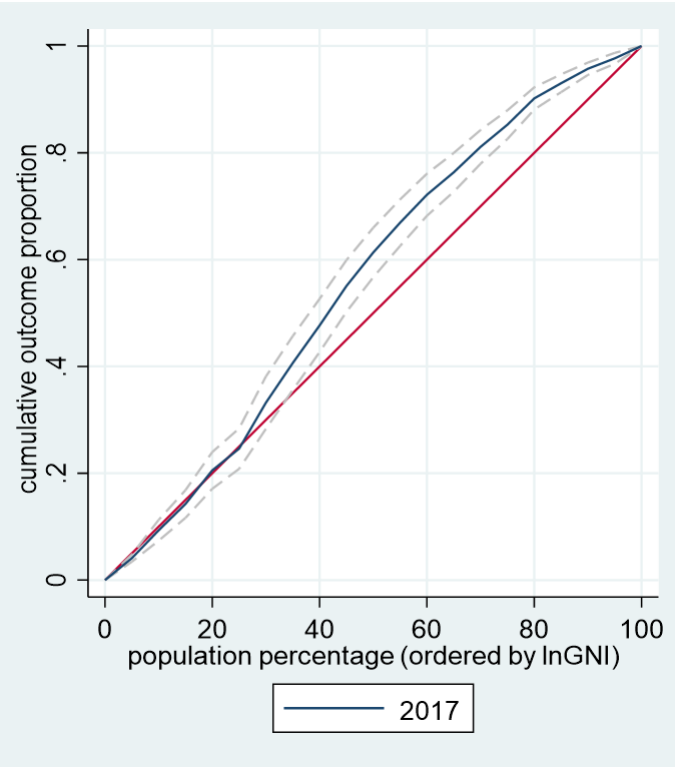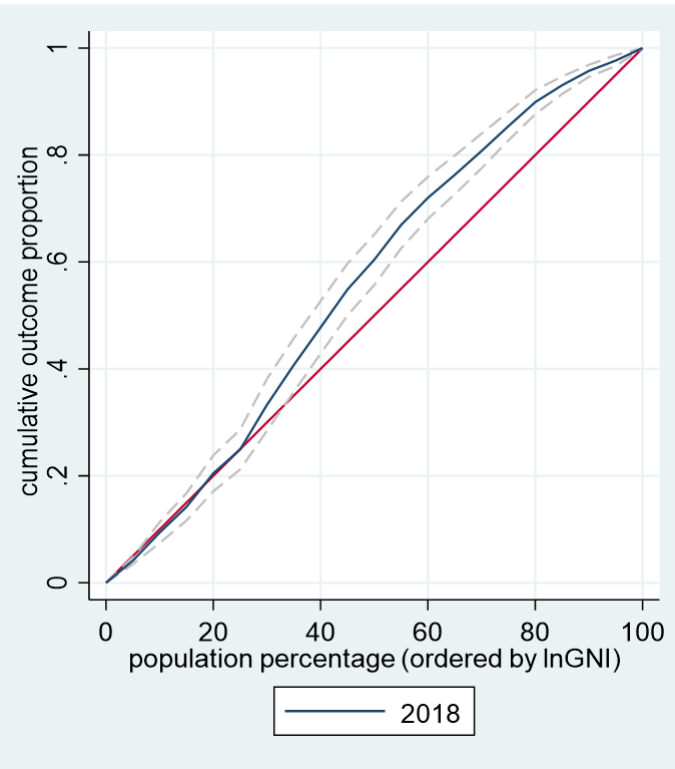

**Figs. S66-83 Concentration curves of age-standardized DALY rates for stroke from 2001 to 2018**

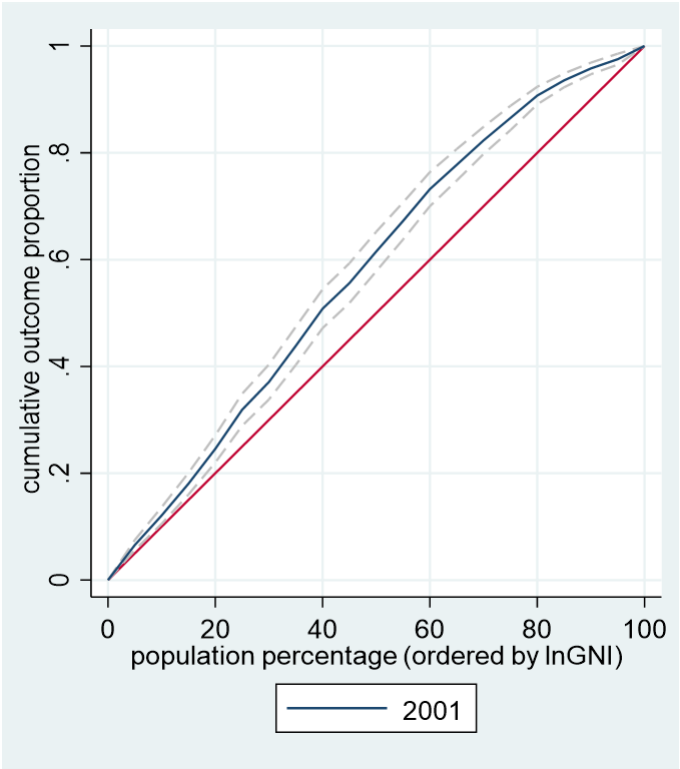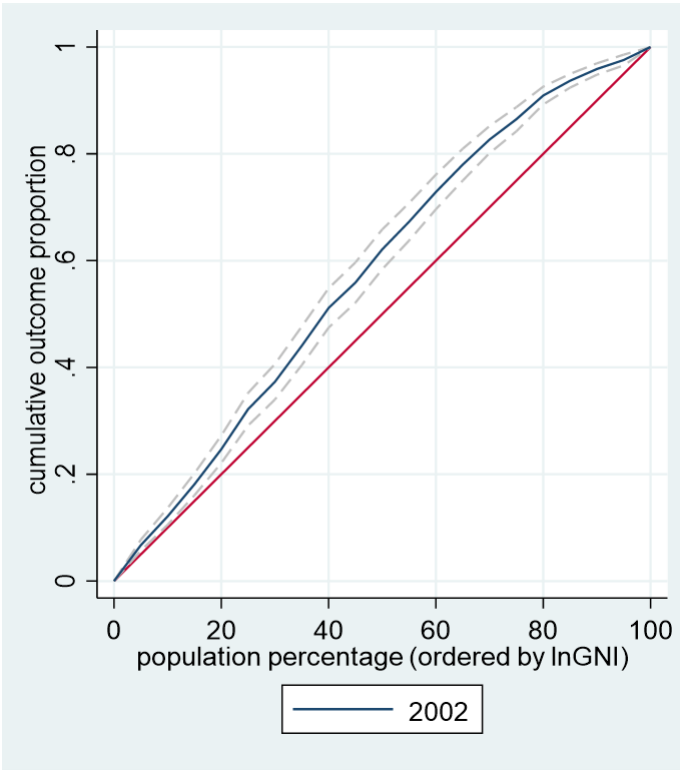

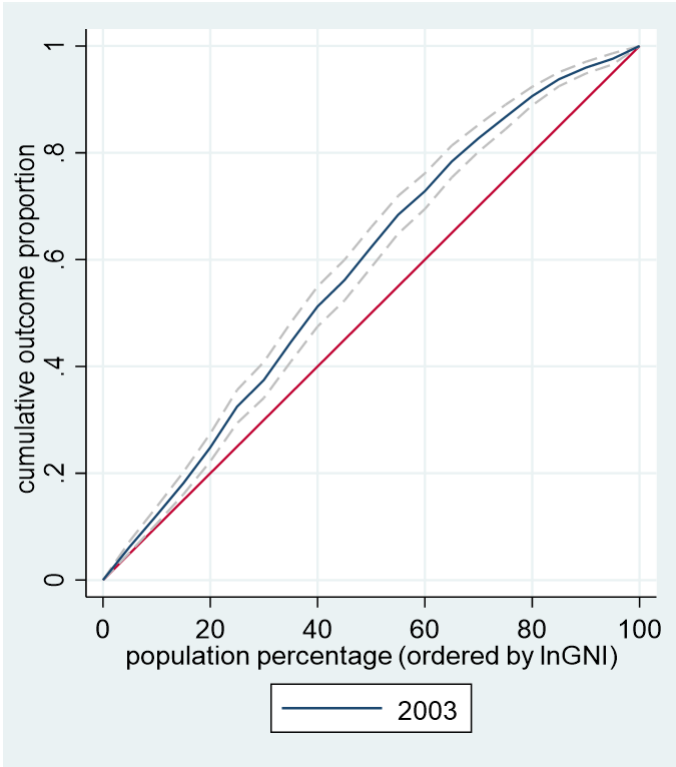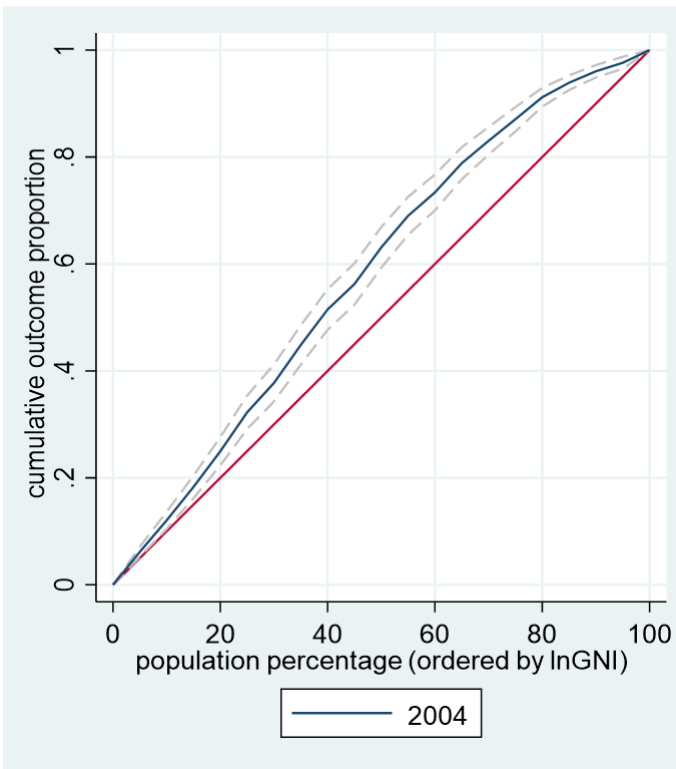

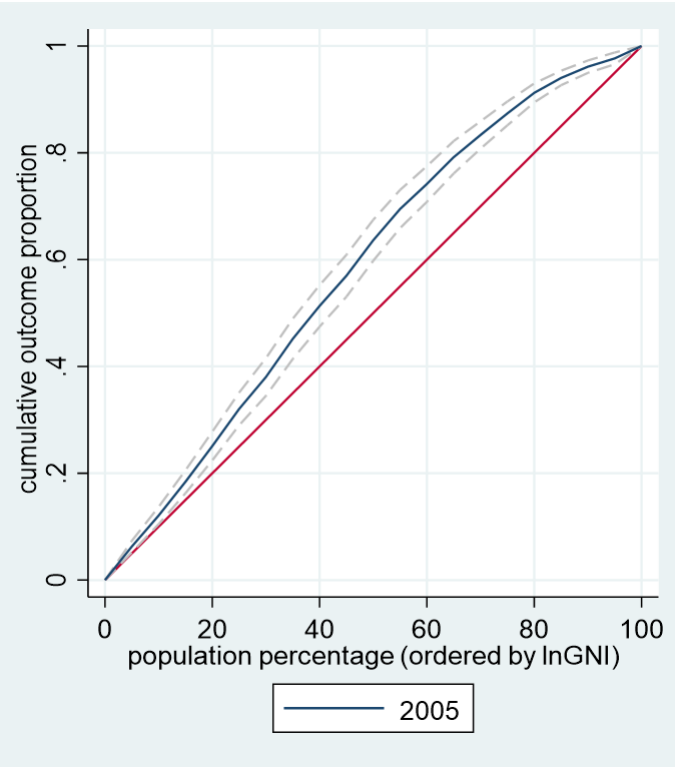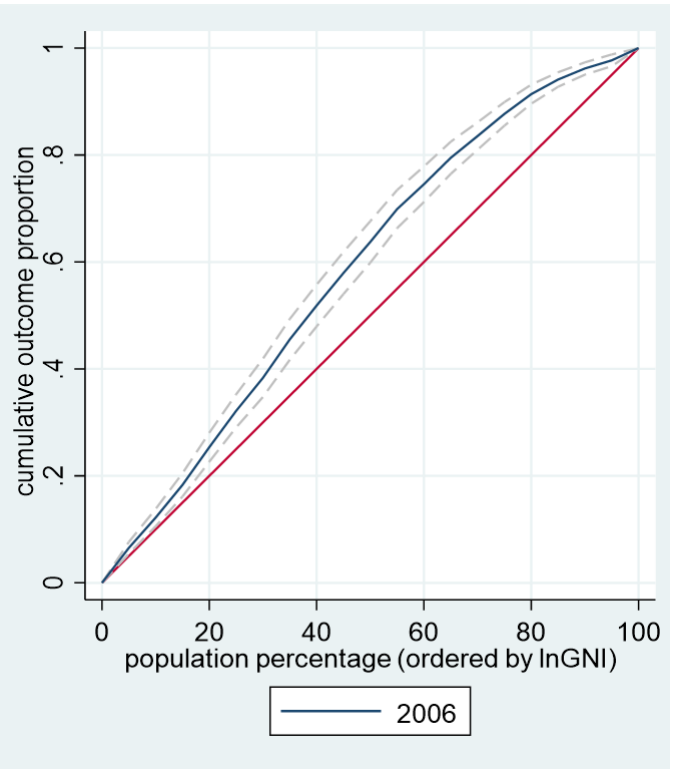

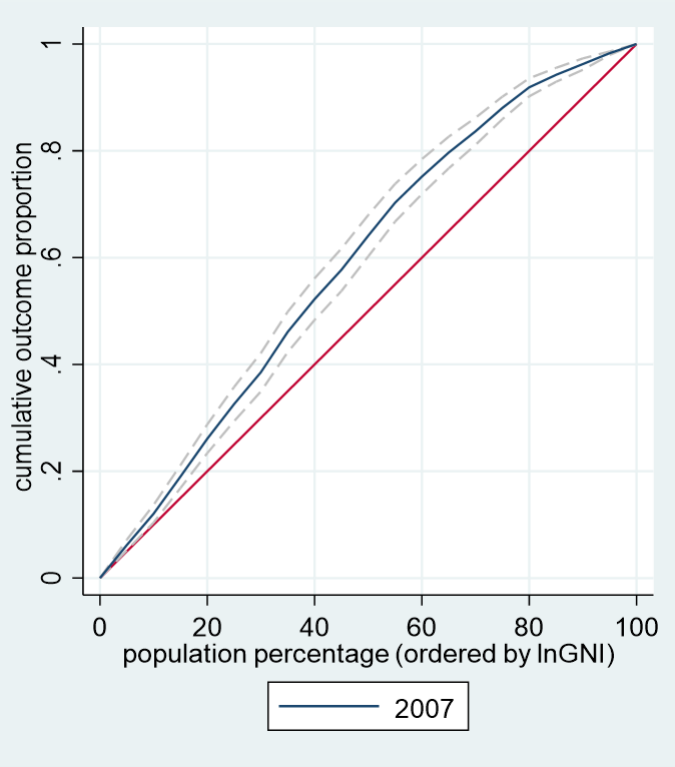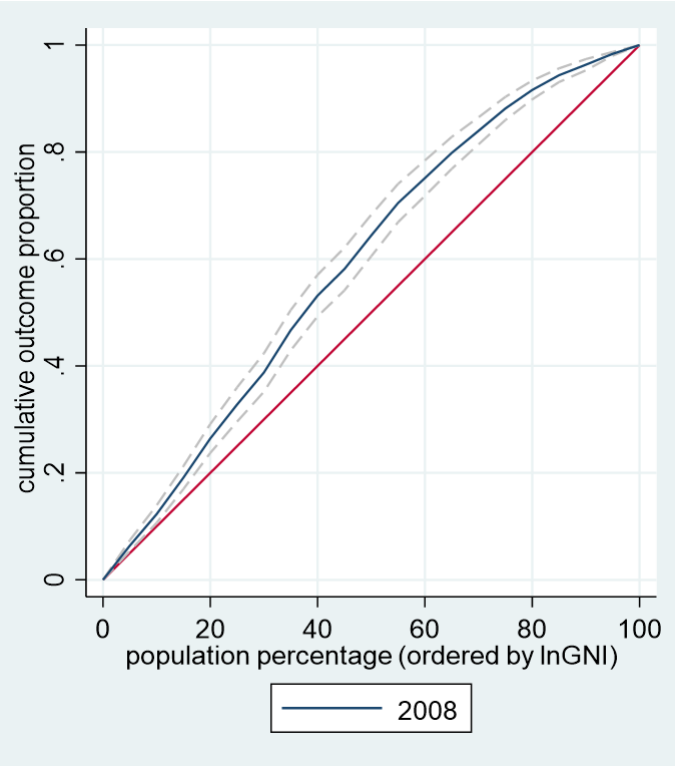

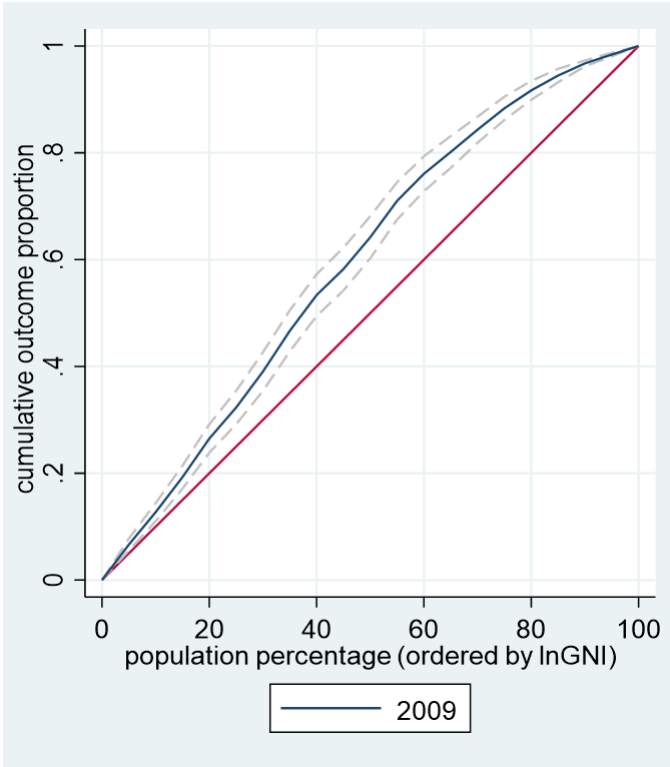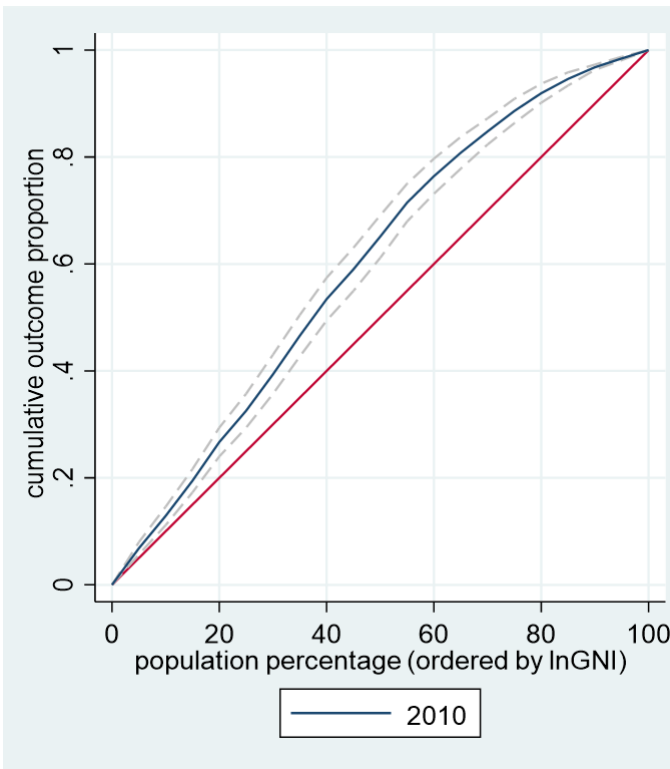

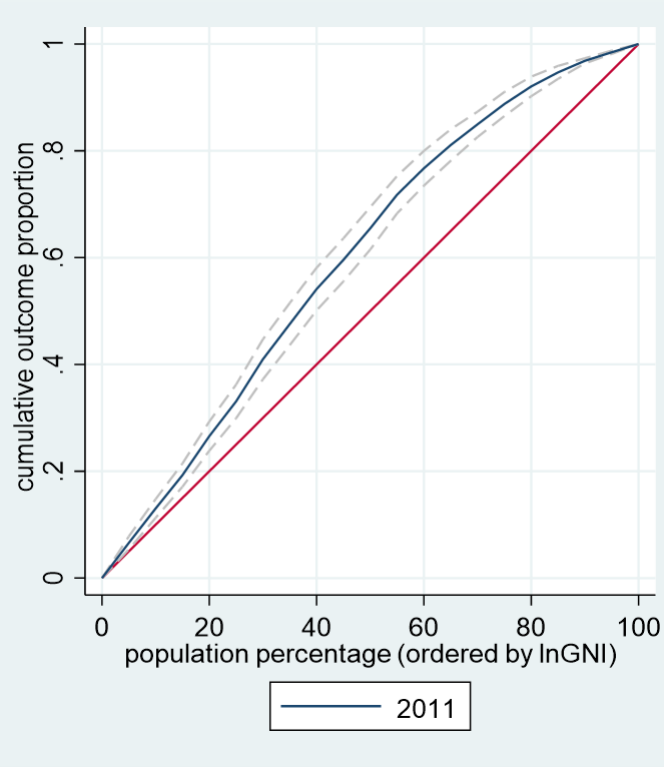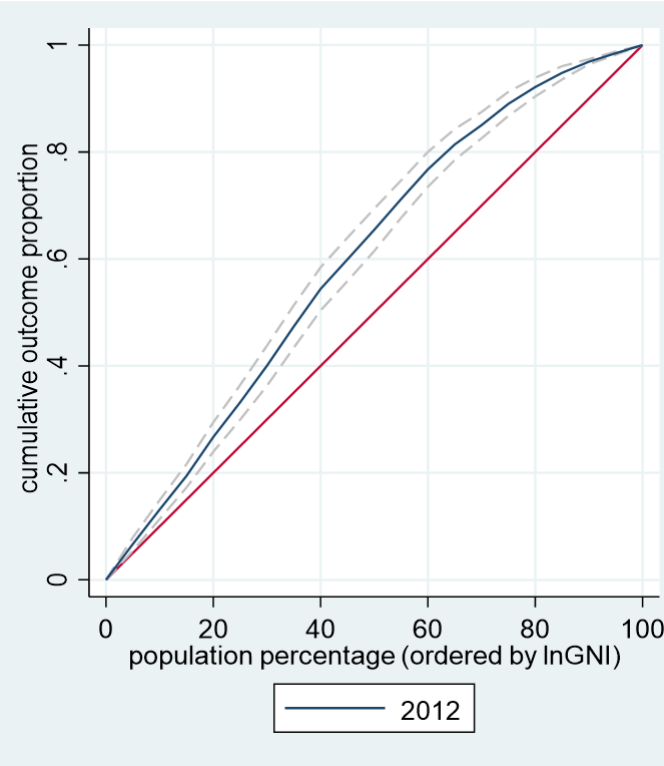

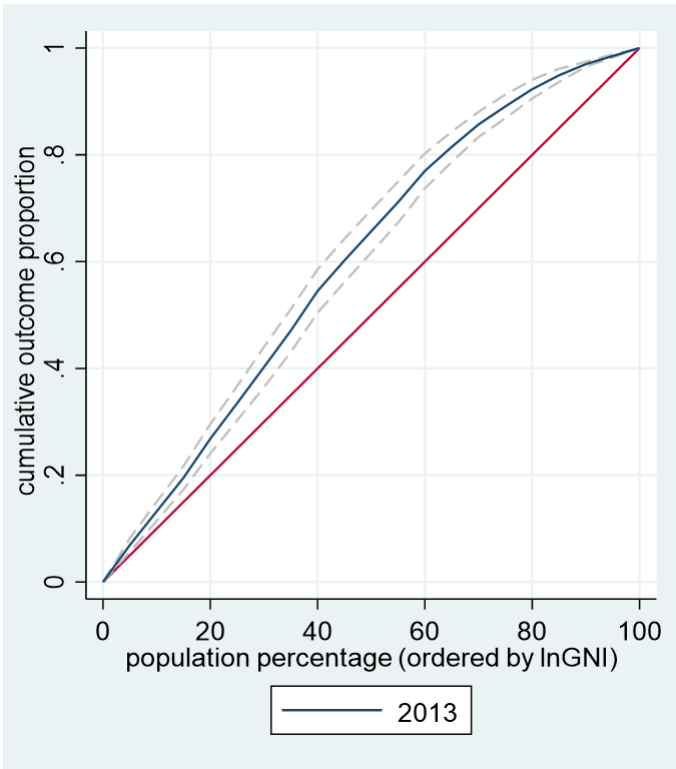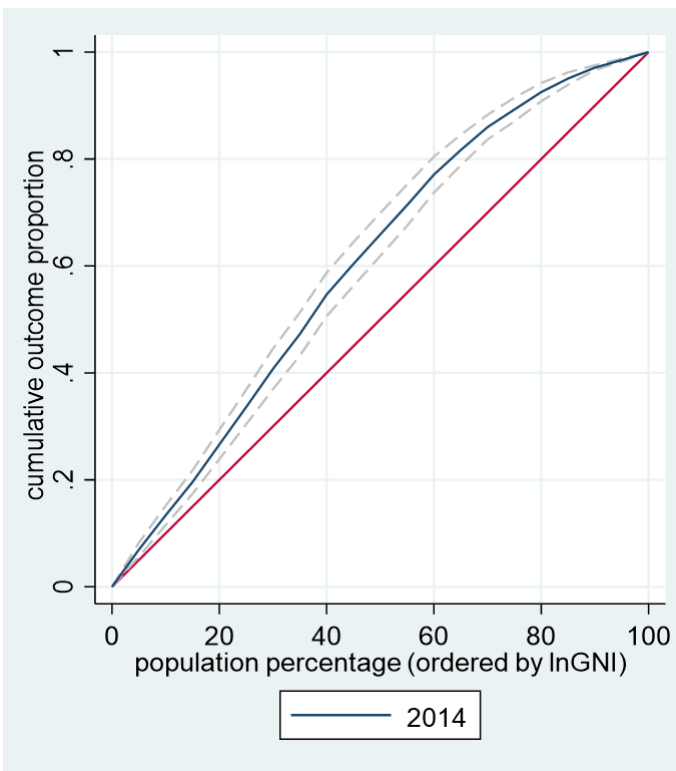

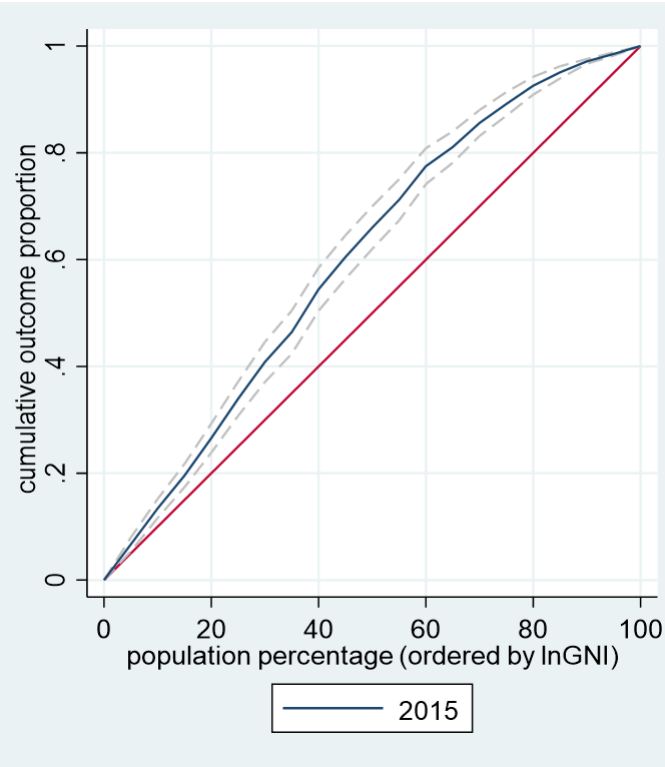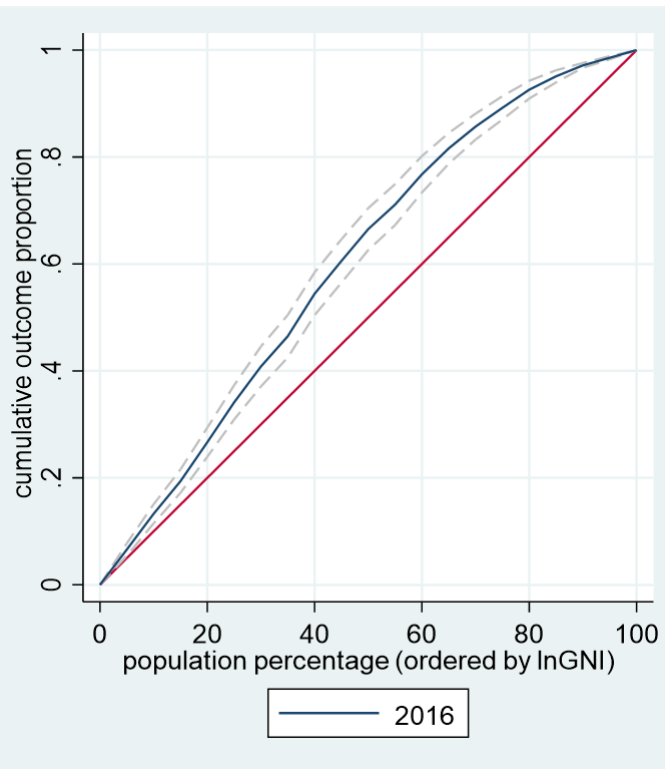

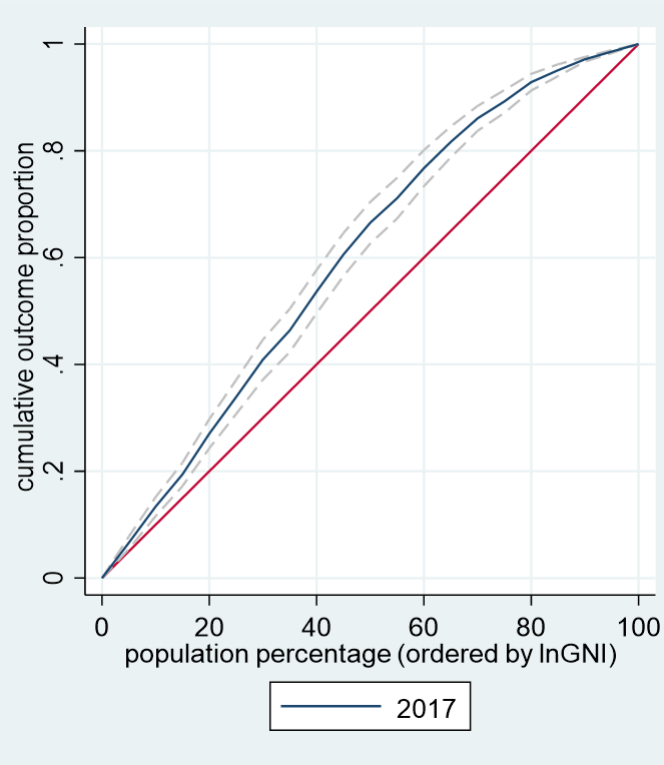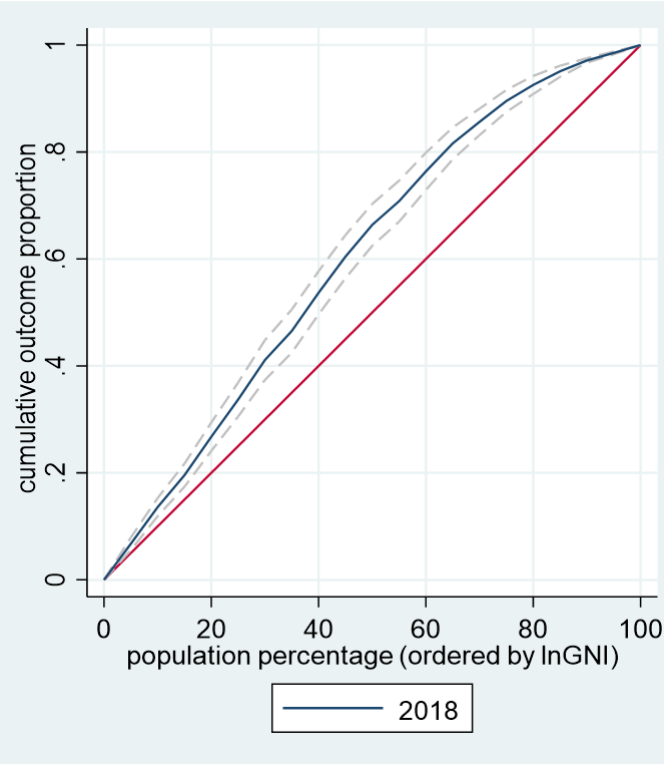

**Figs. S84-101 Concentration curves of age-standardized DALY rates for hypertensive heart disease from 2001 to 2018**

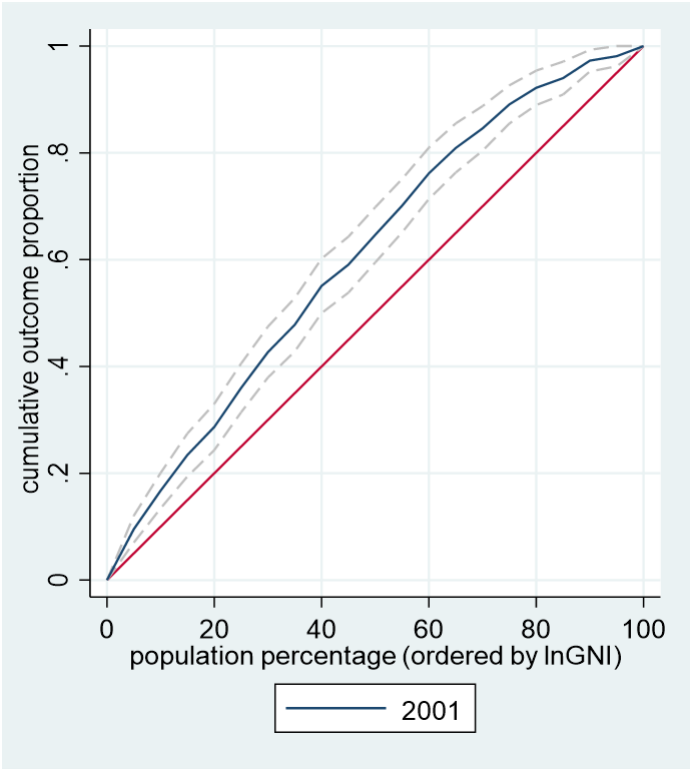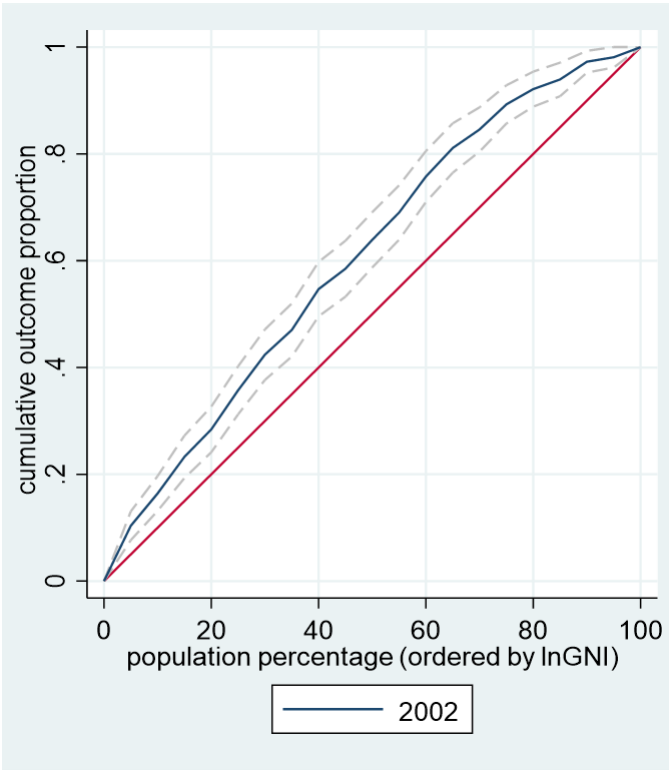

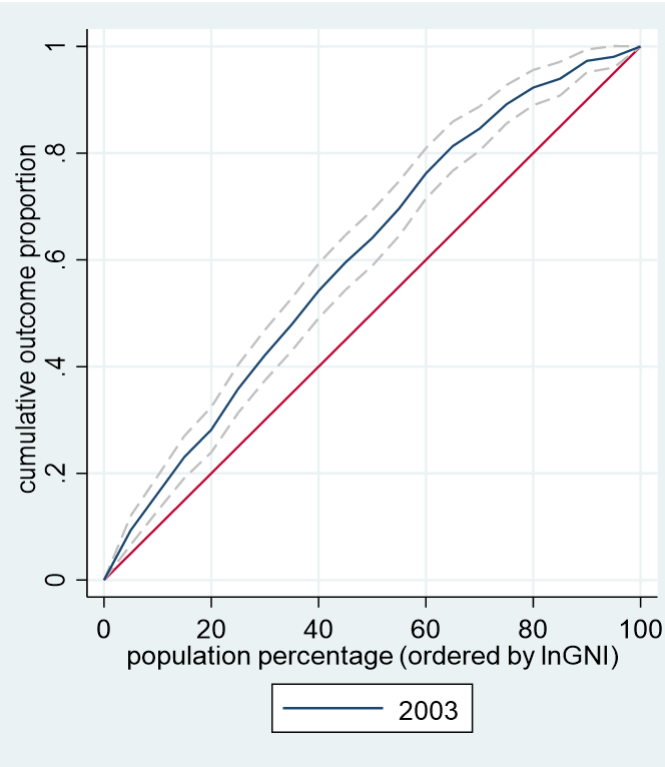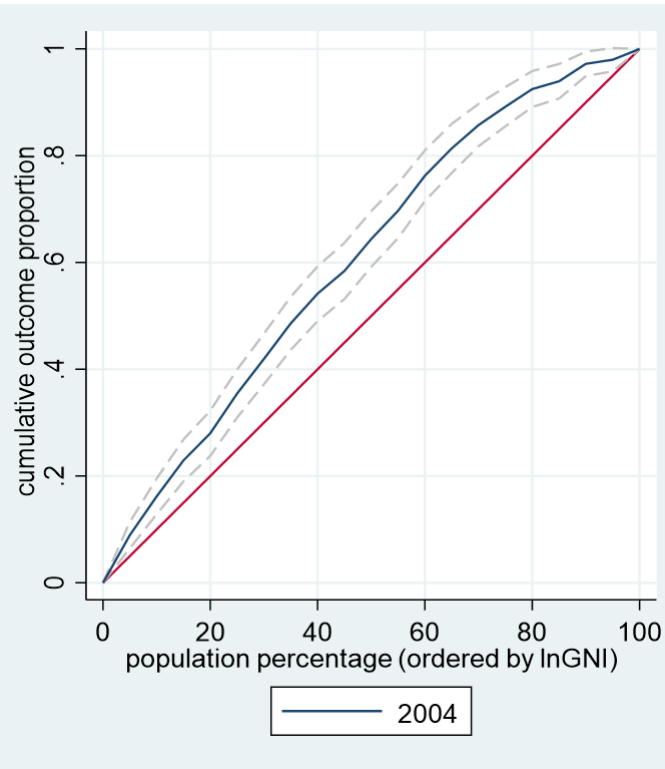

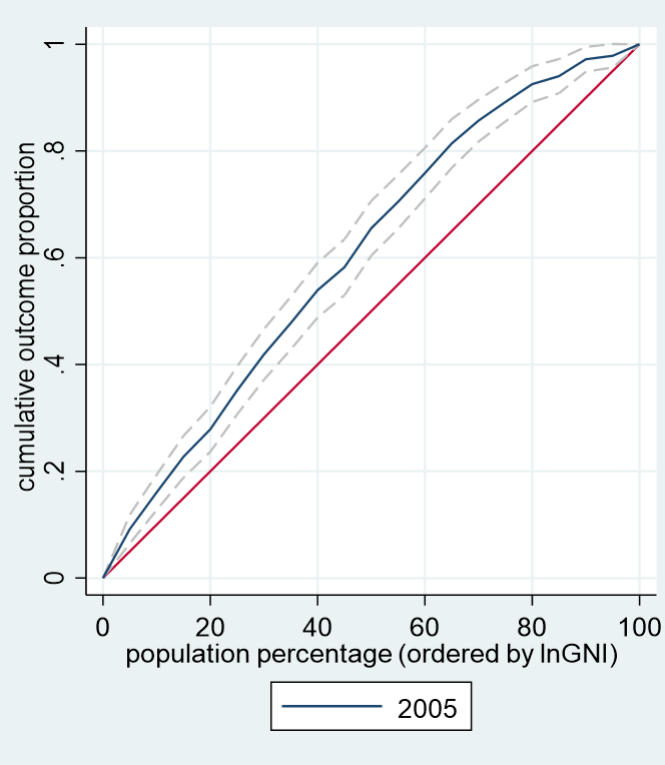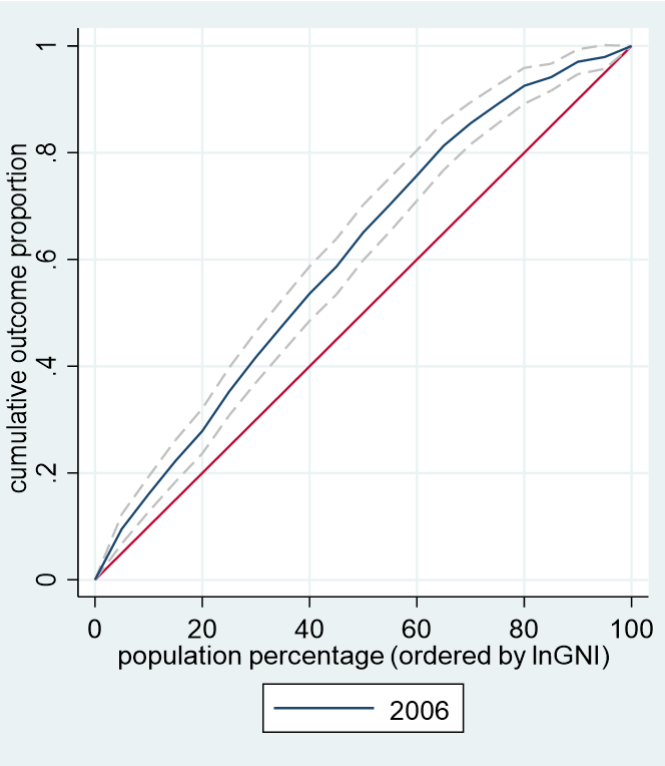

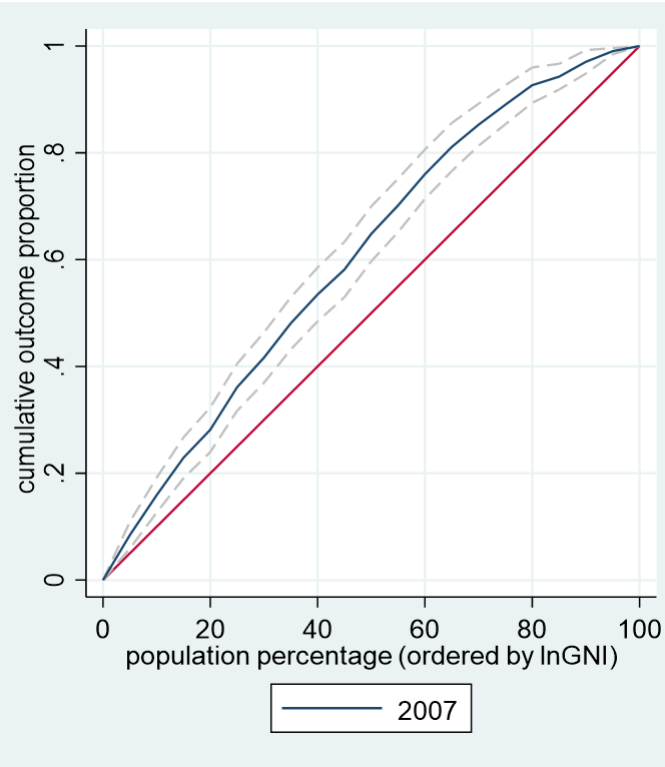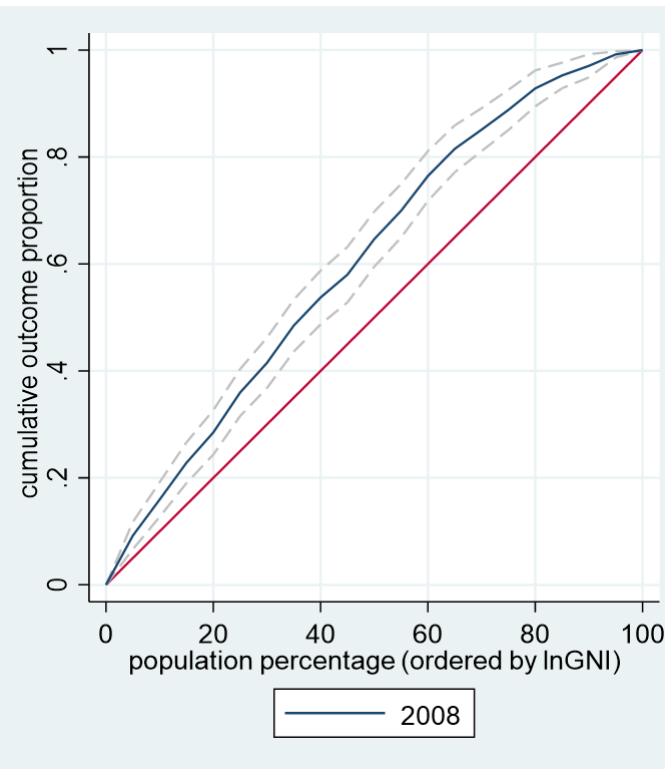

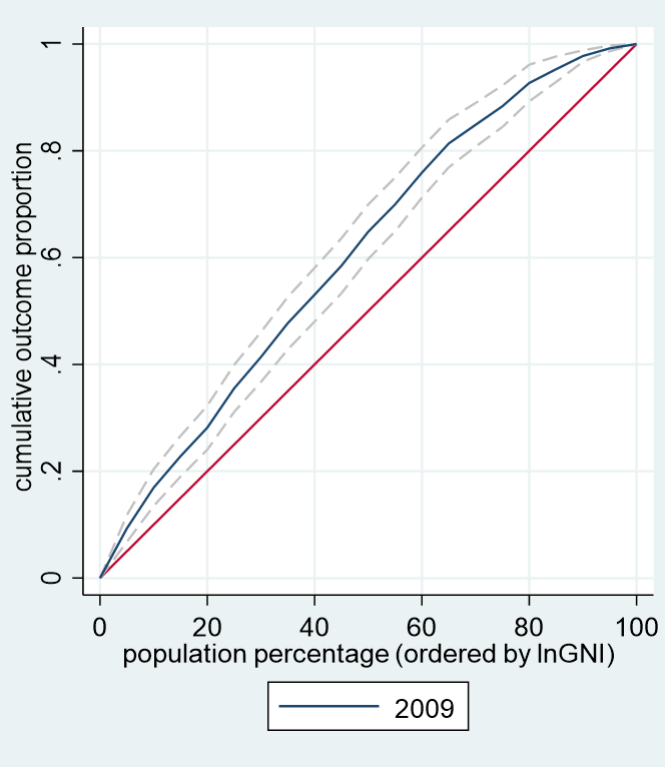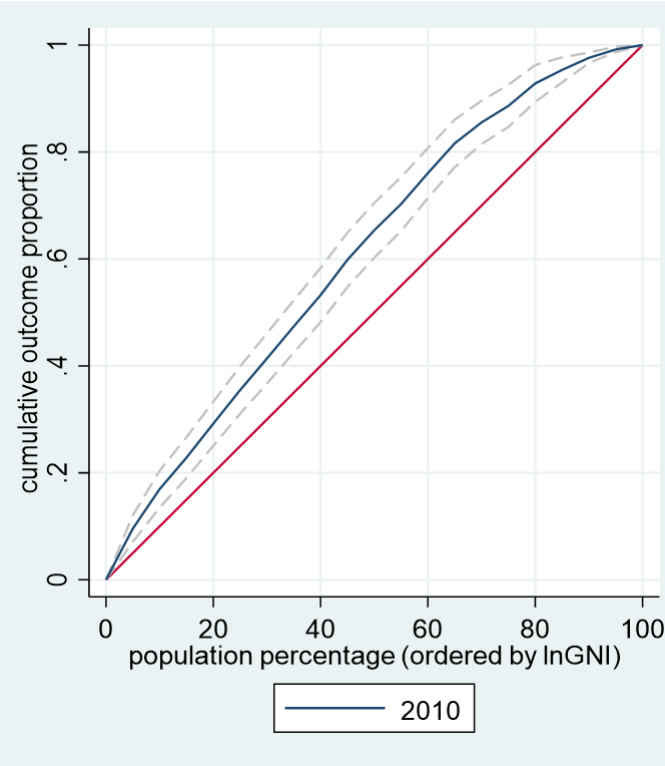

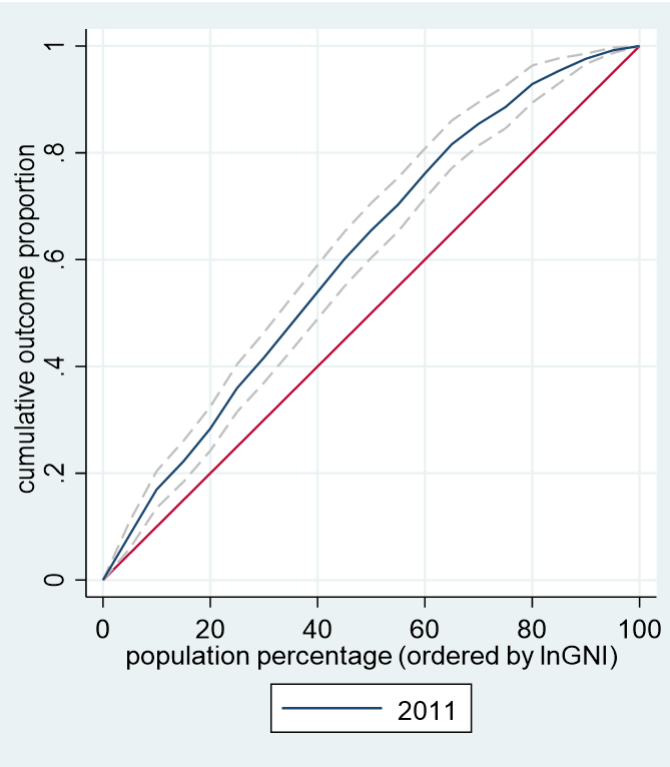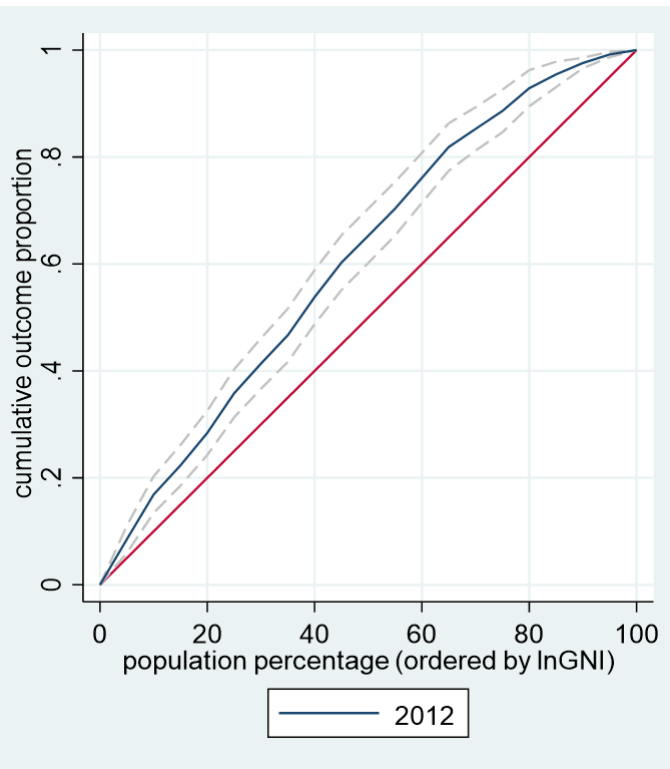

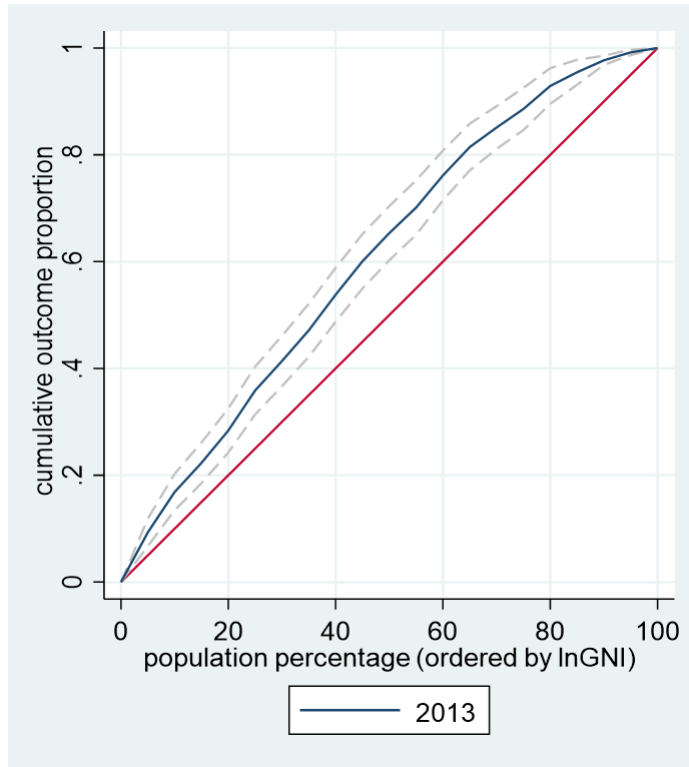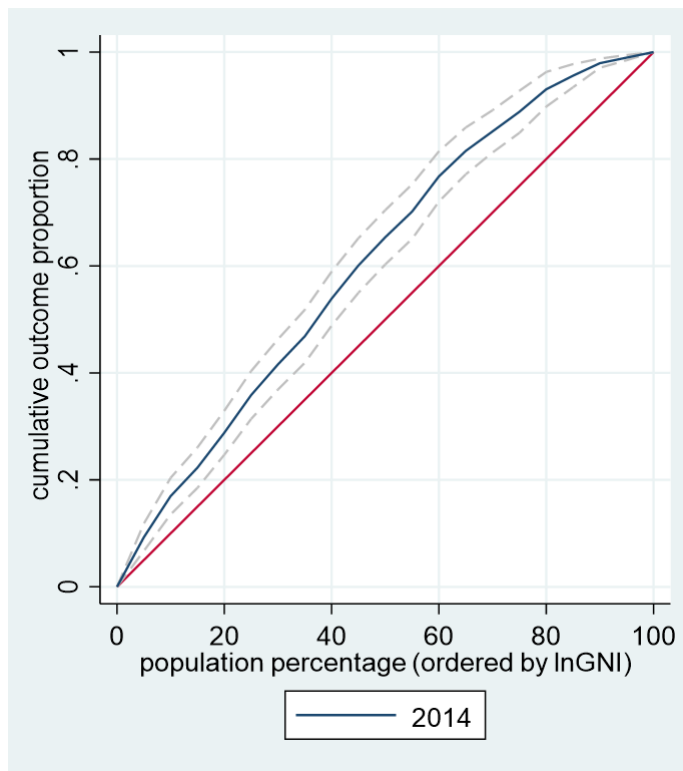

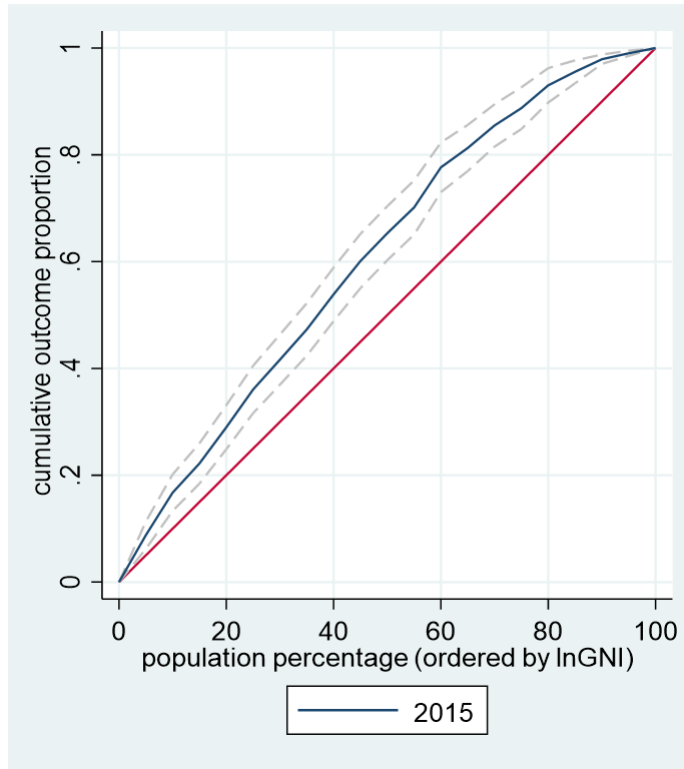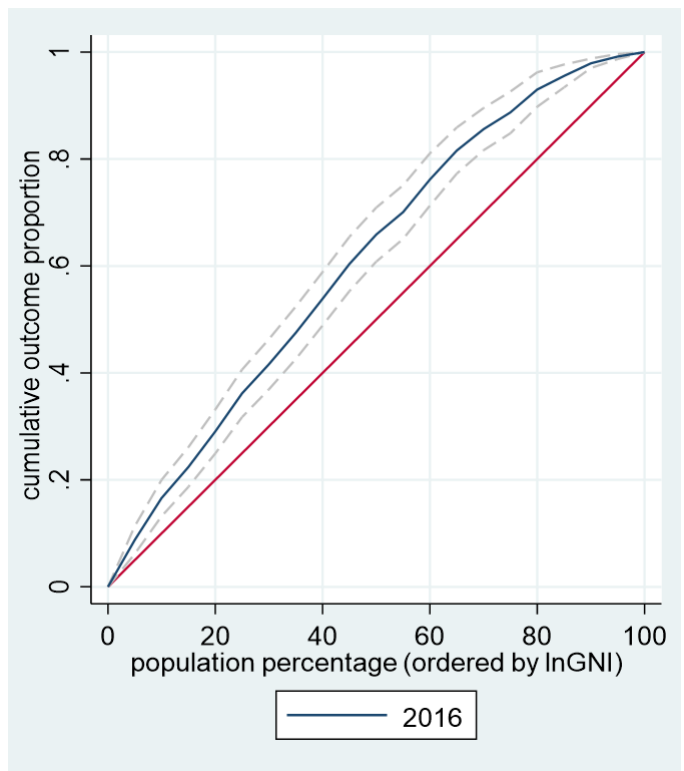

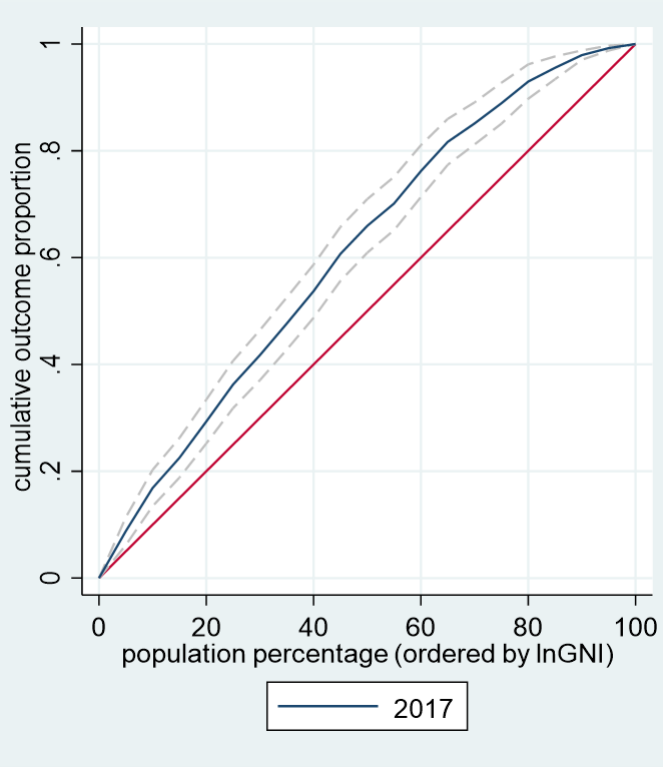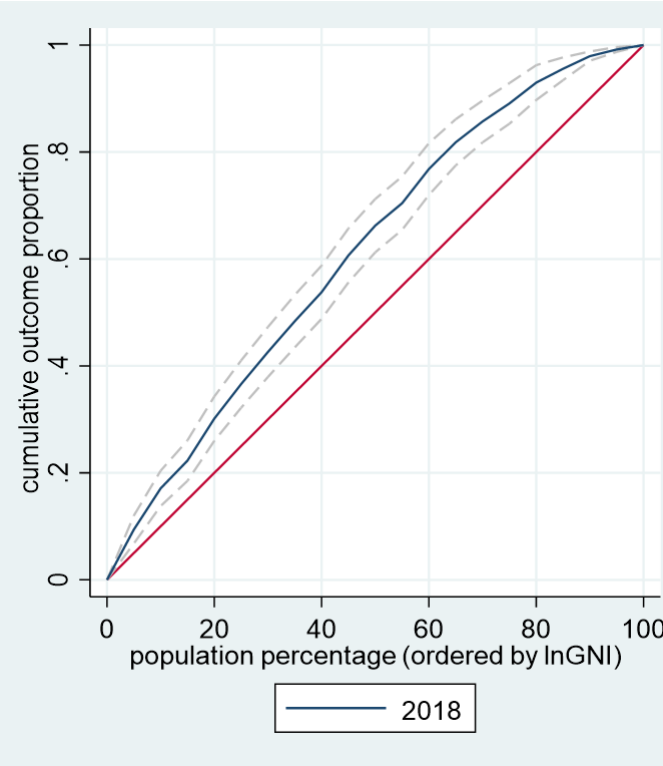

**Figs. S102-119** Concentration curves of age-standardized DALY rates for non-rheumatic valvular heart disease from 2001 to 2018

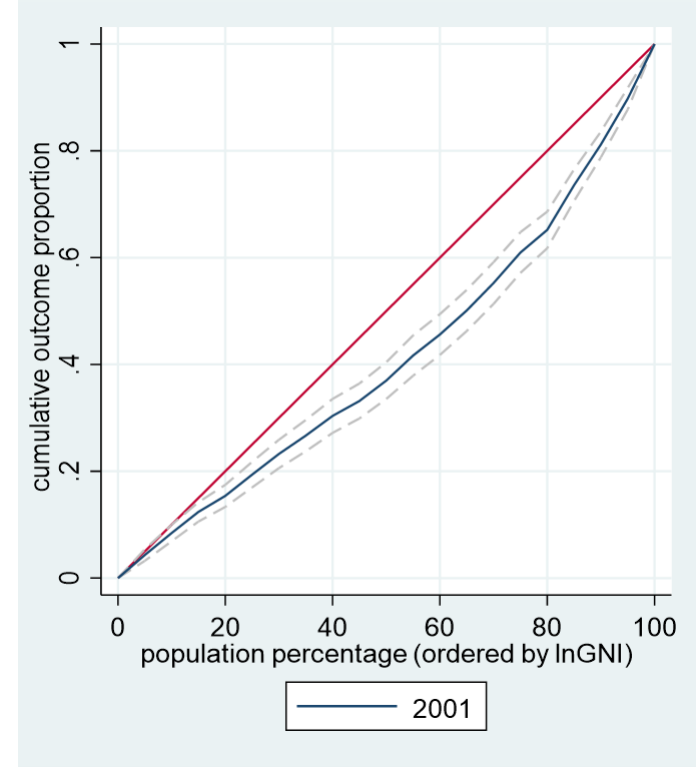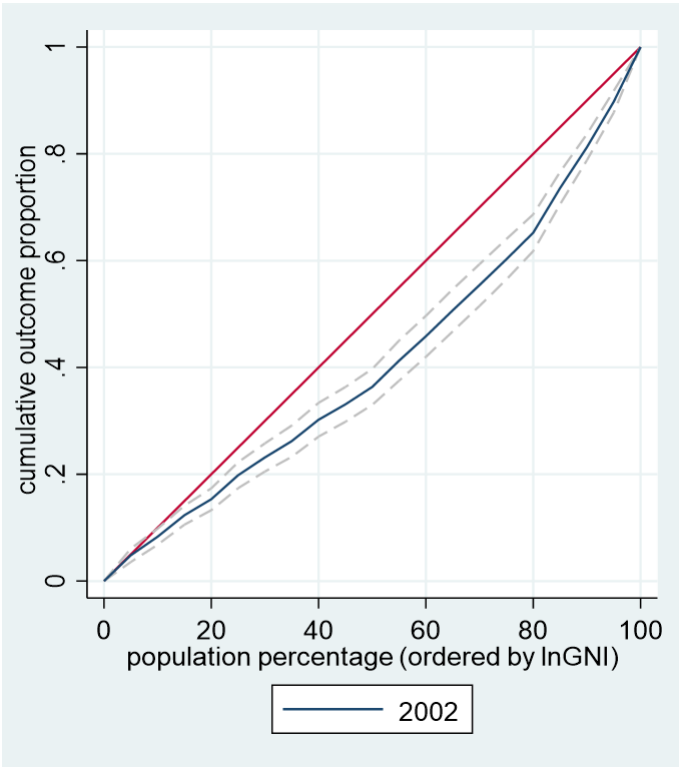

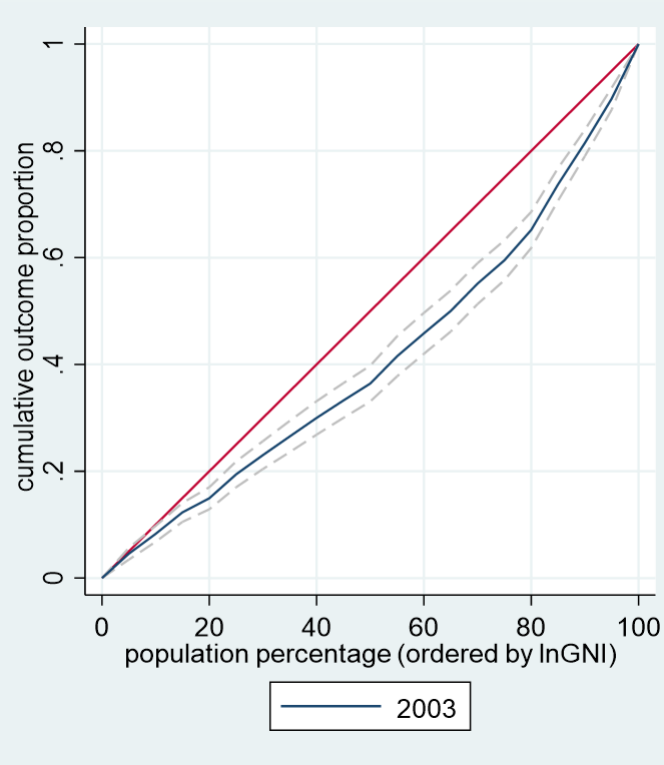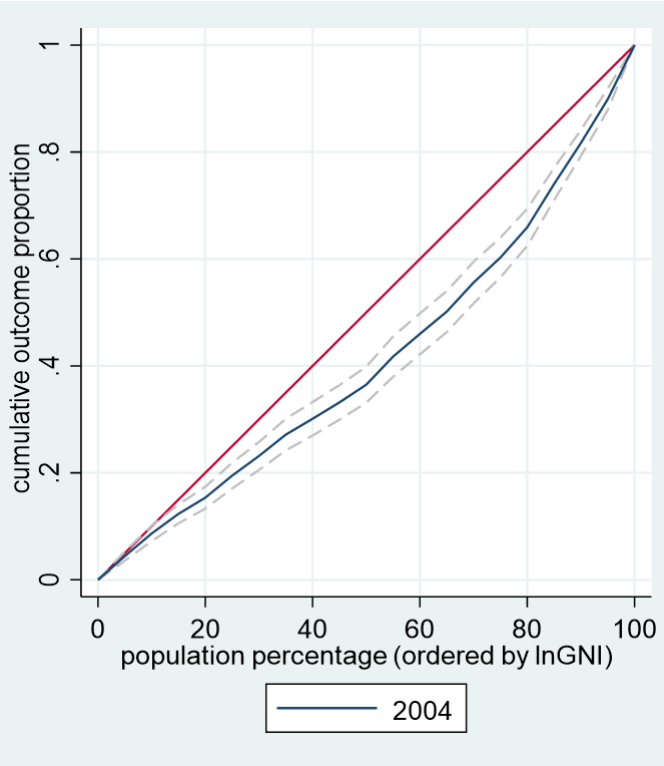

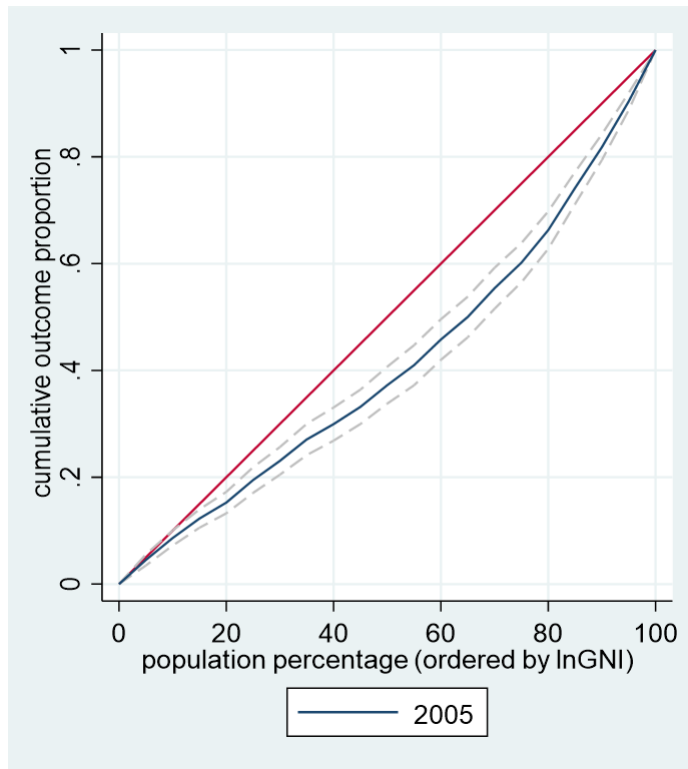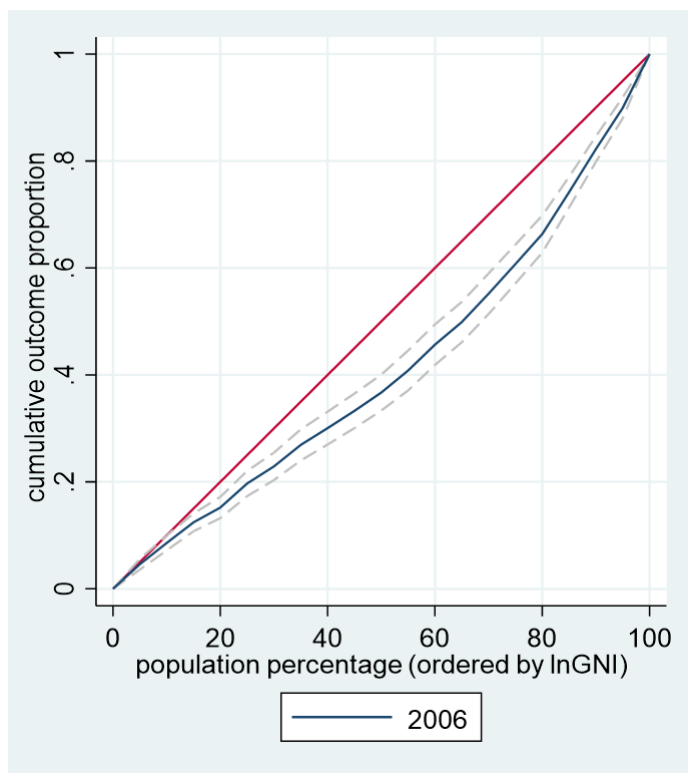

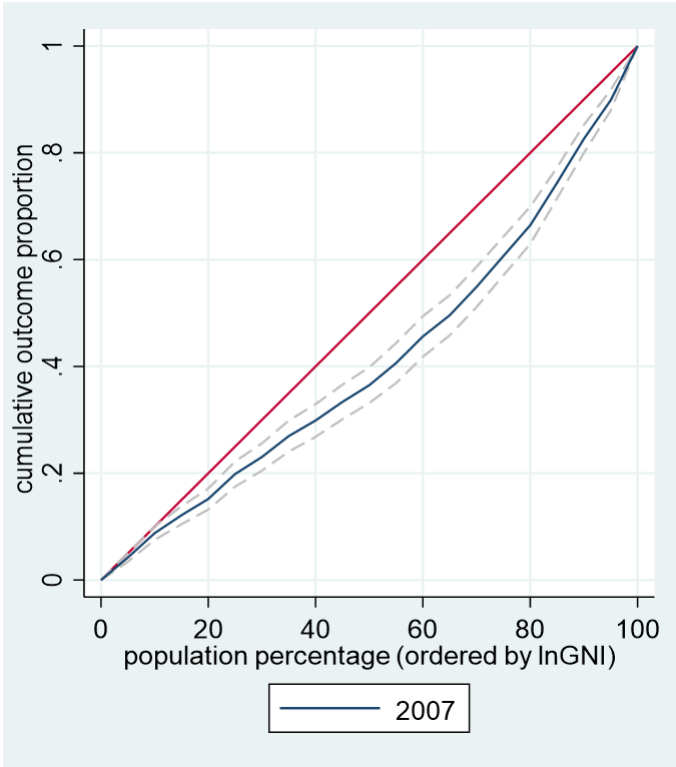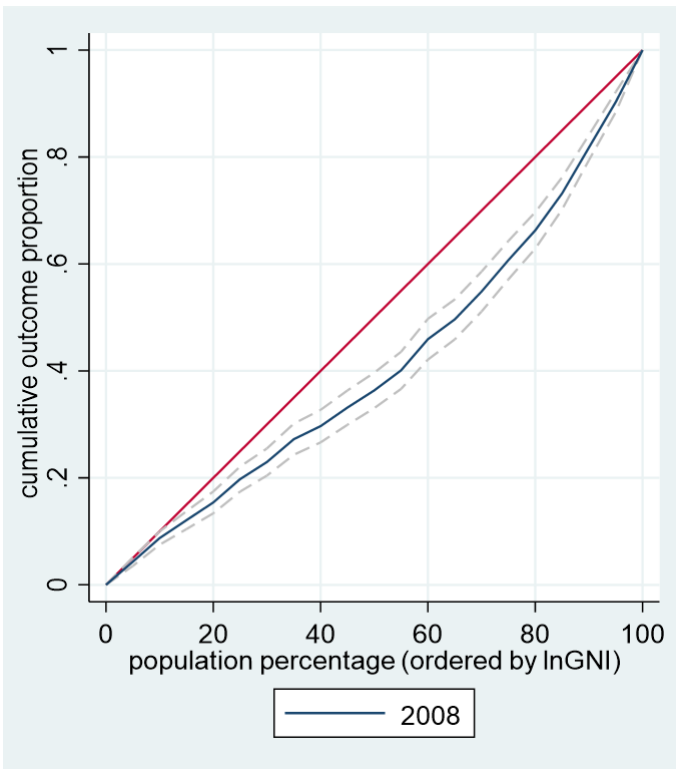

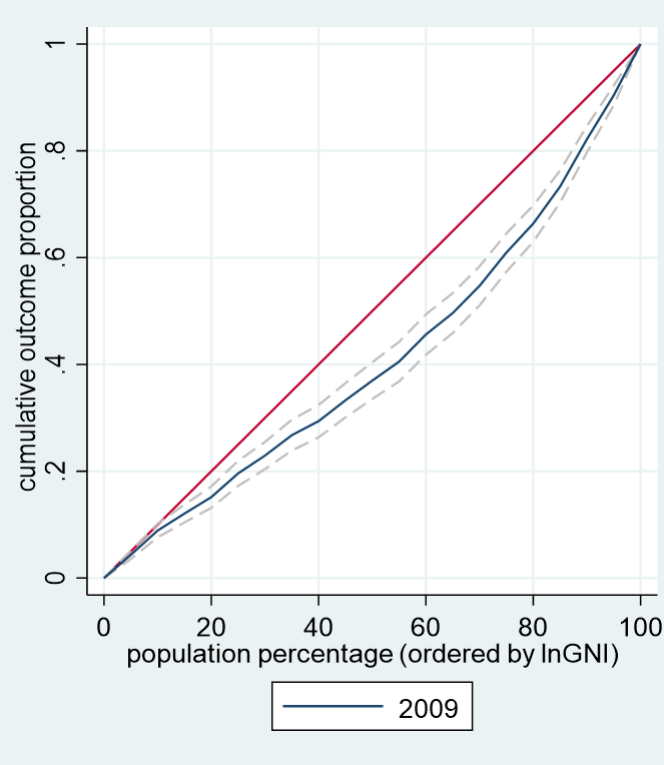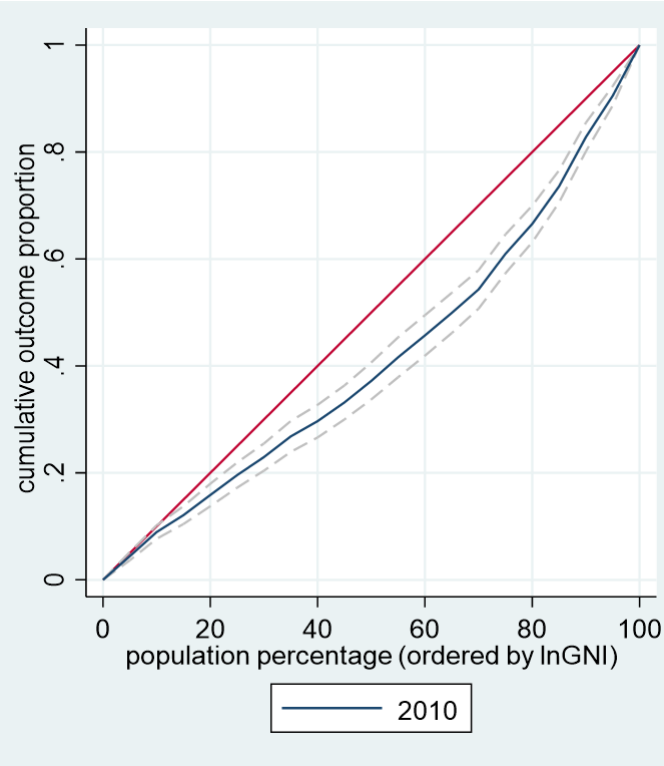

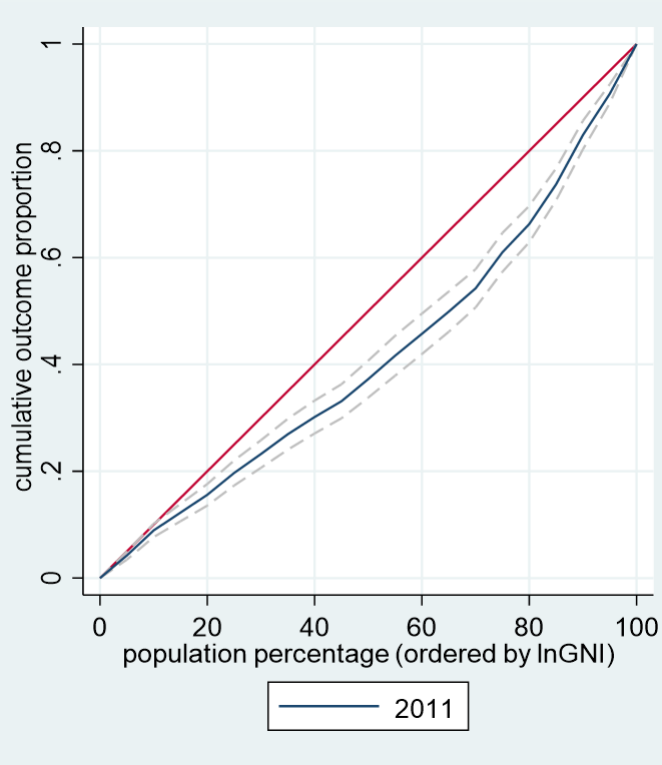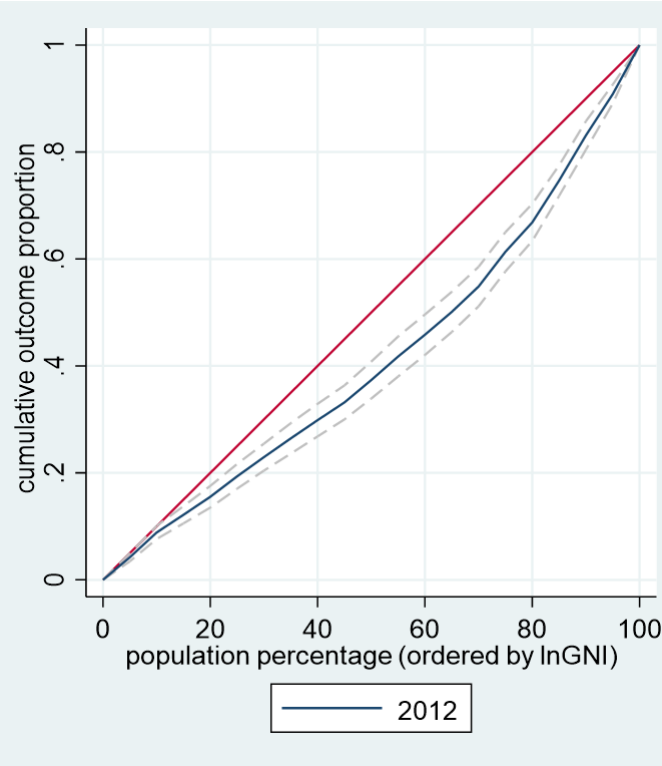

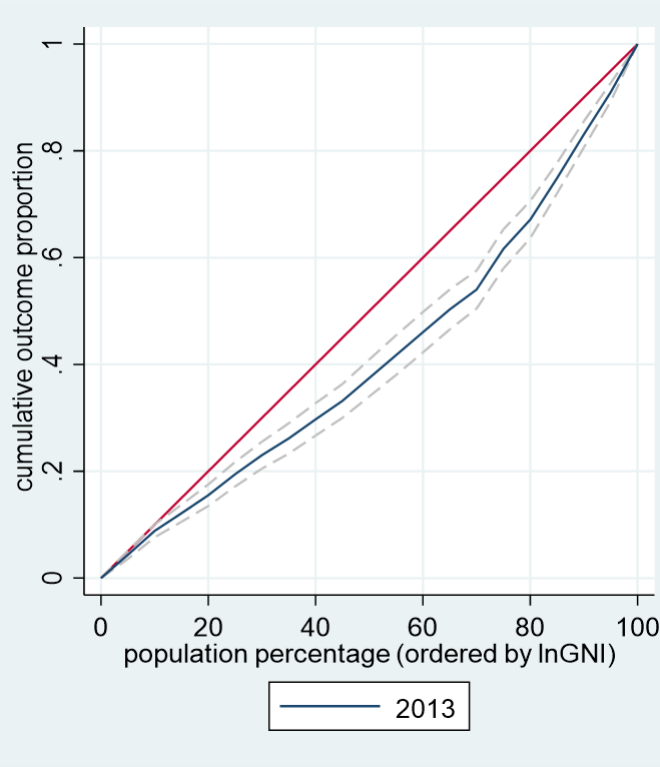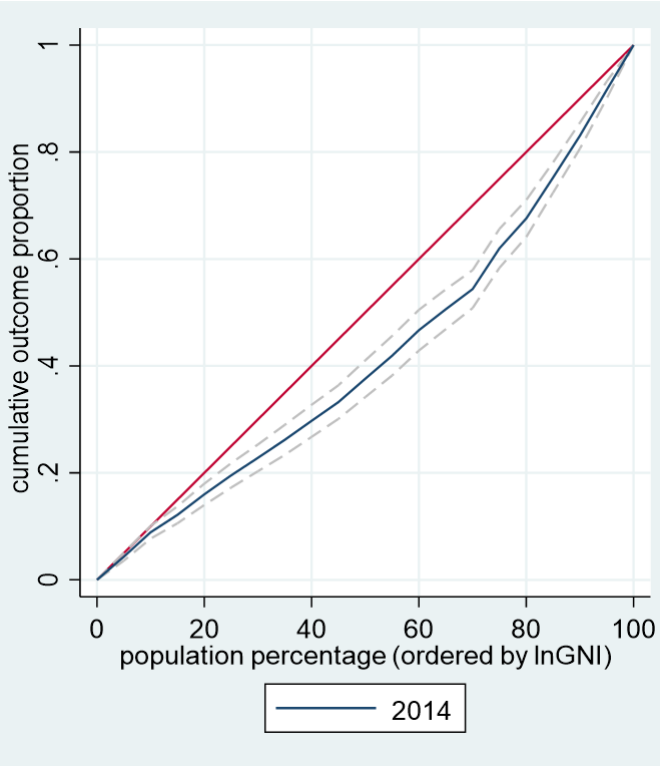

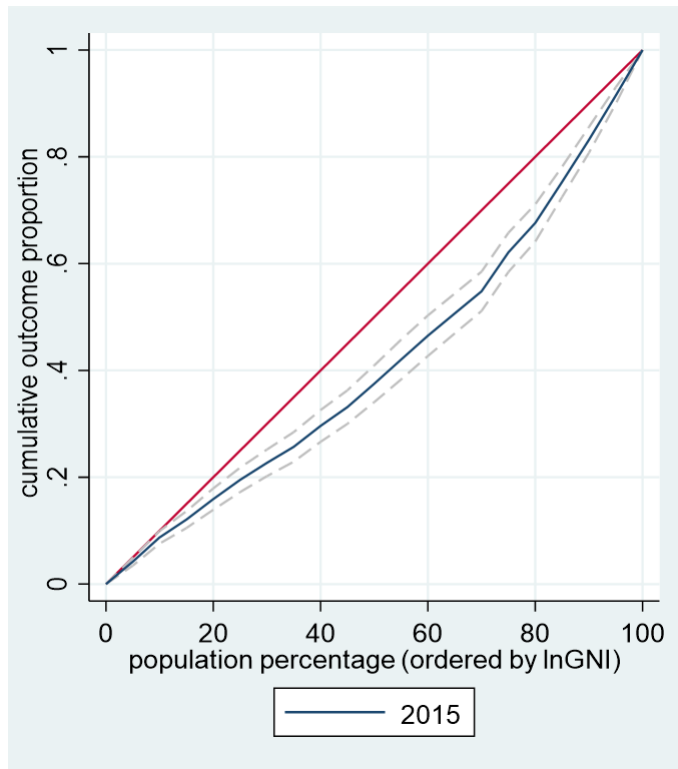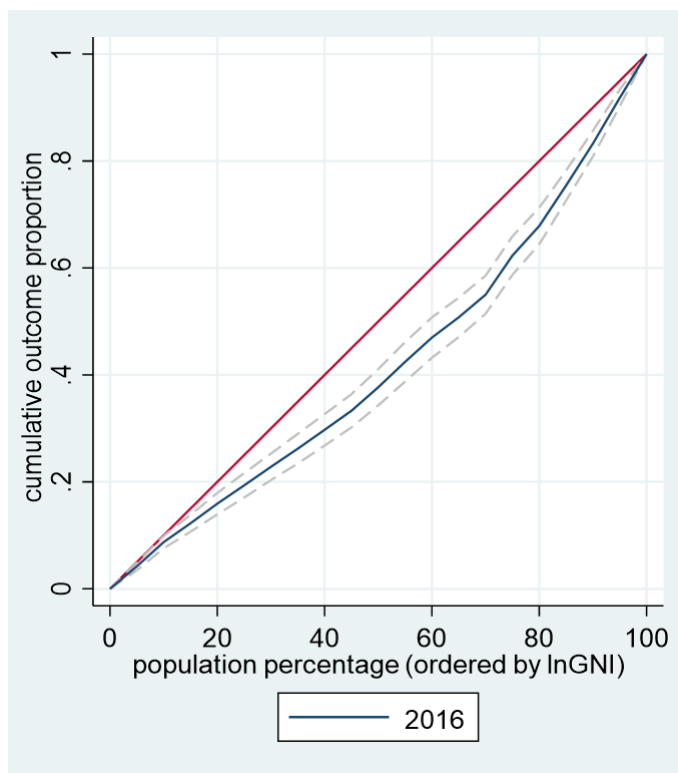

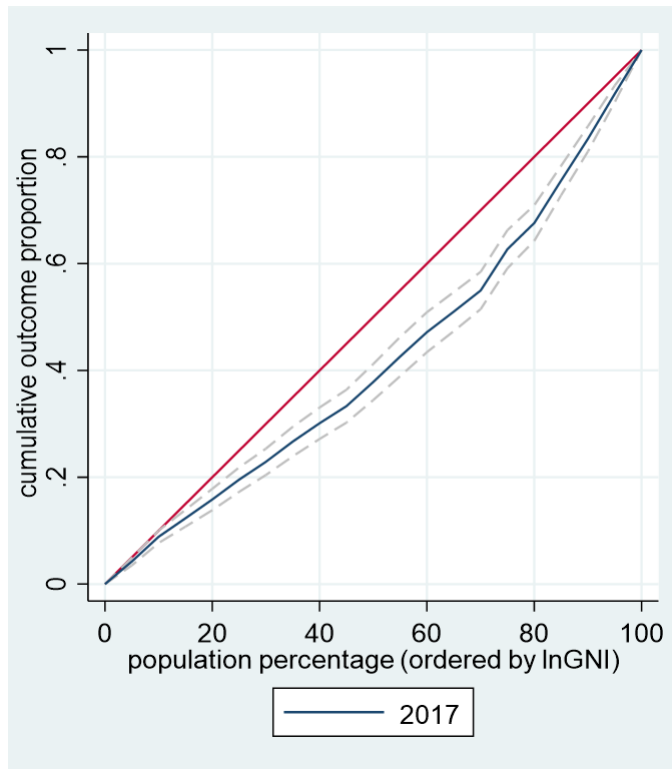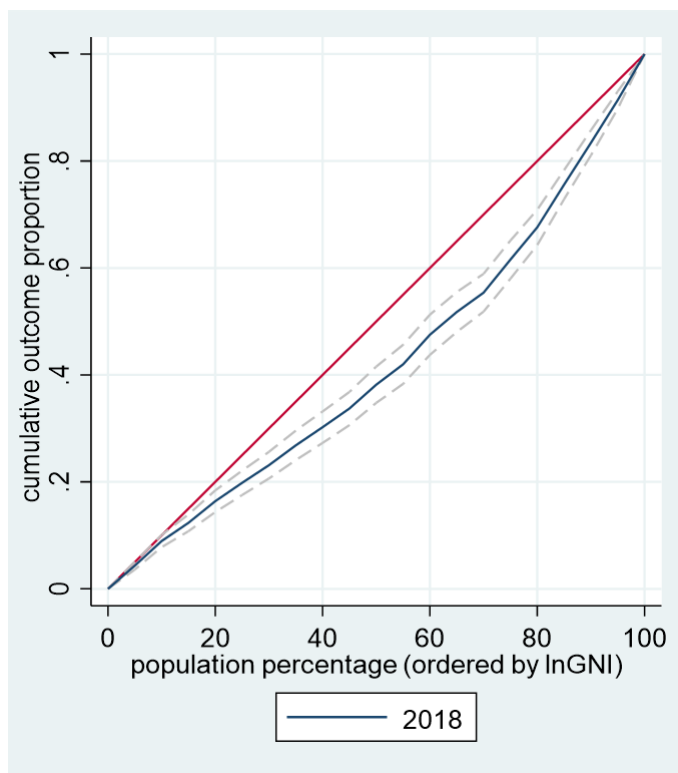

**Figs. S120-137 Concentration curves of age-standardized DALY rates for cardiomyopathy and myocarditis from 2001 to 2018**

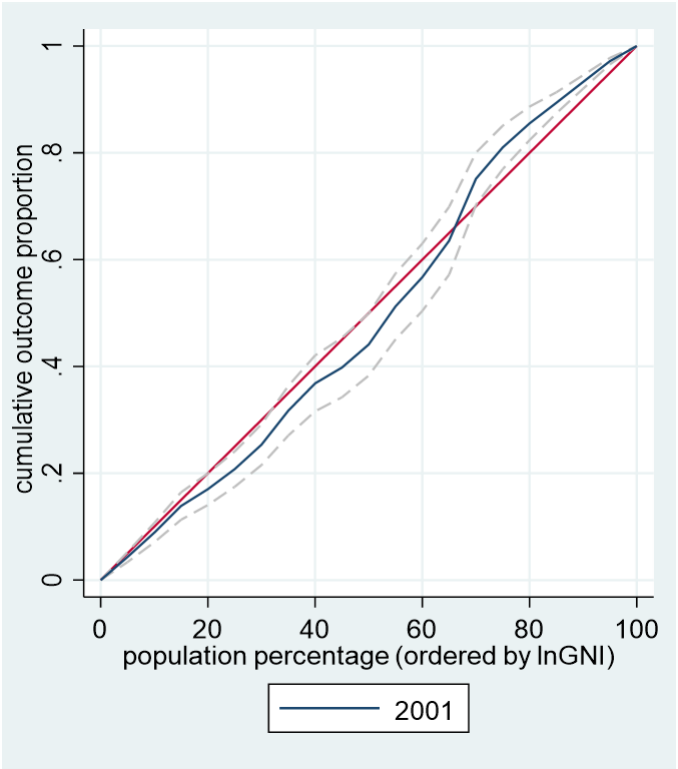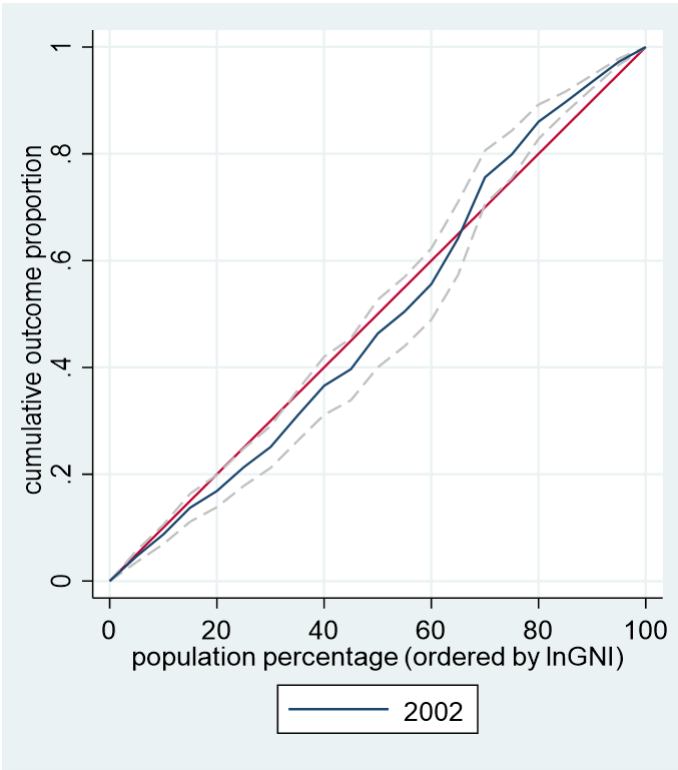

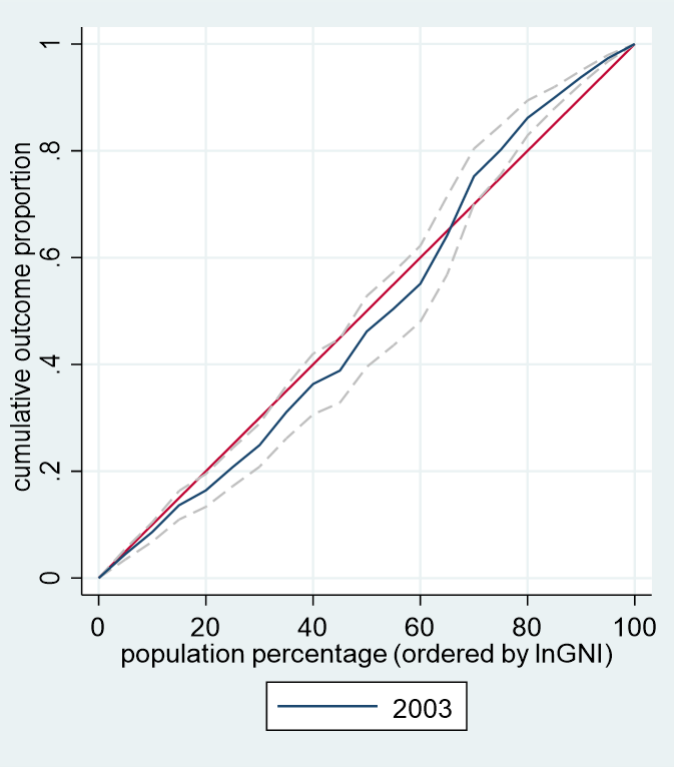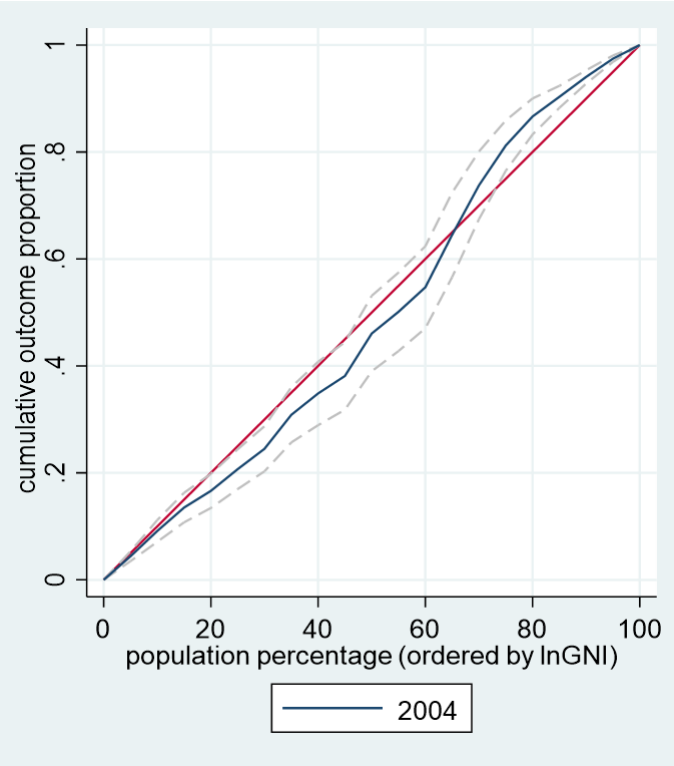

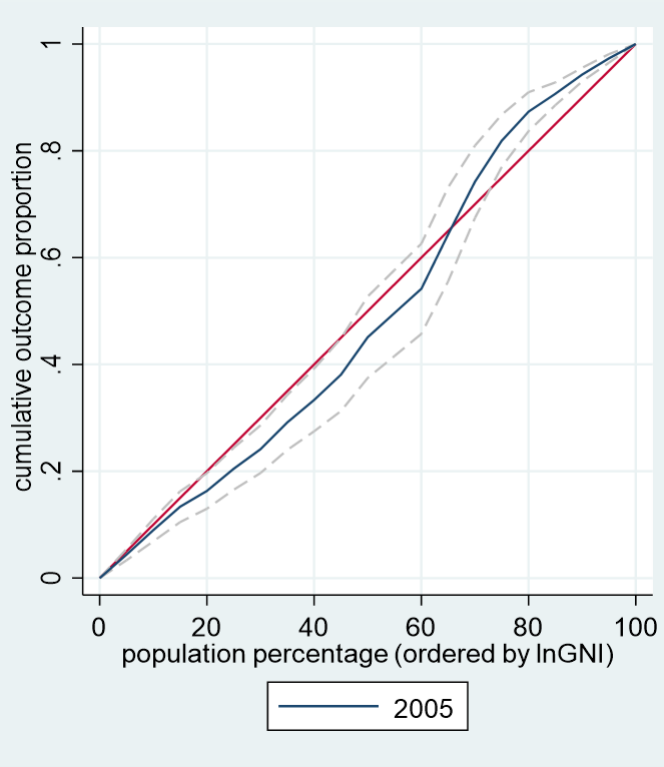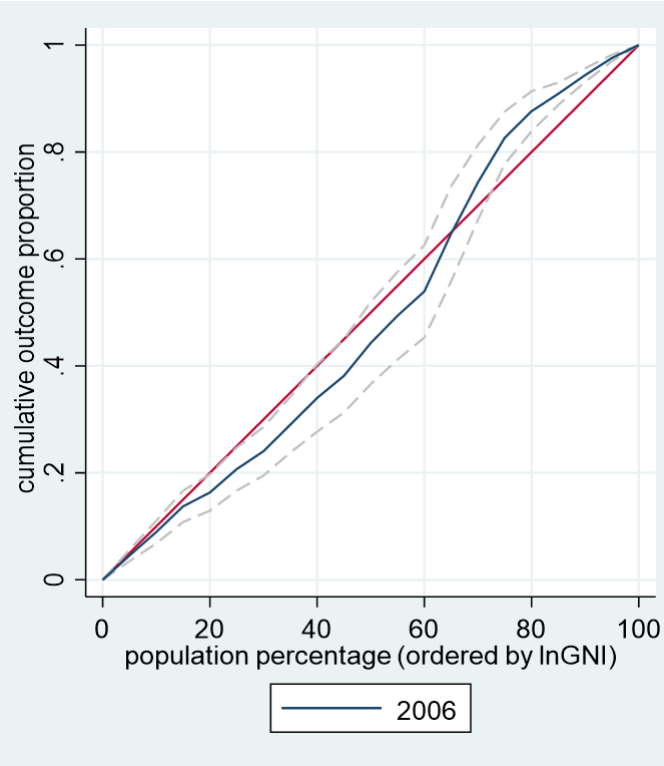

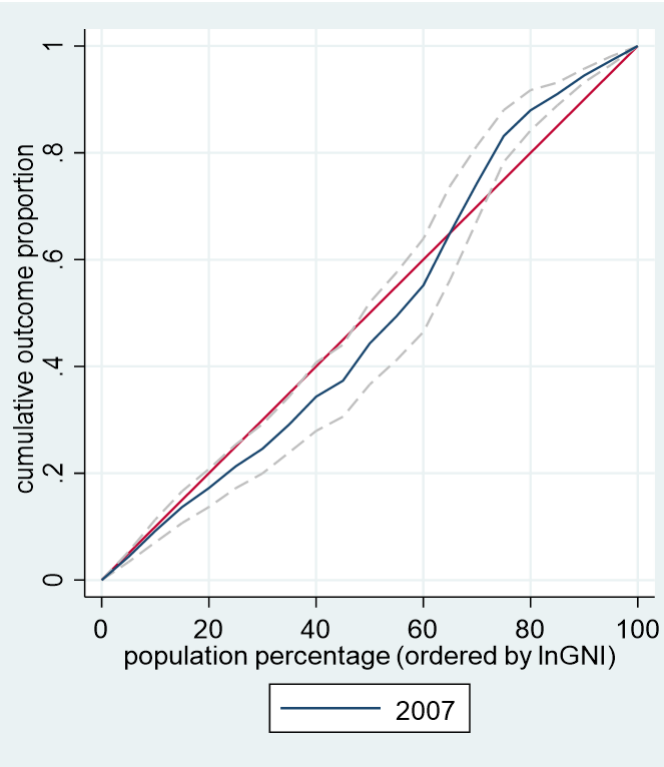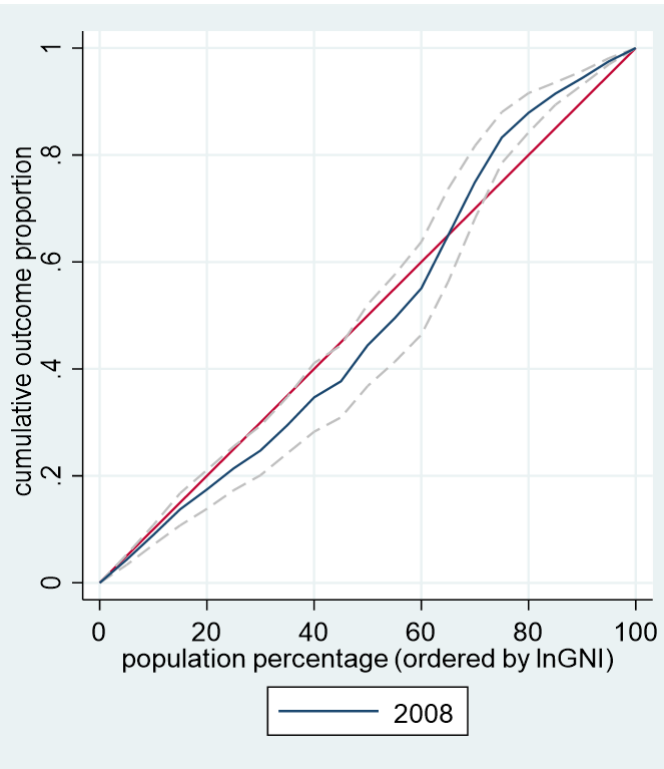

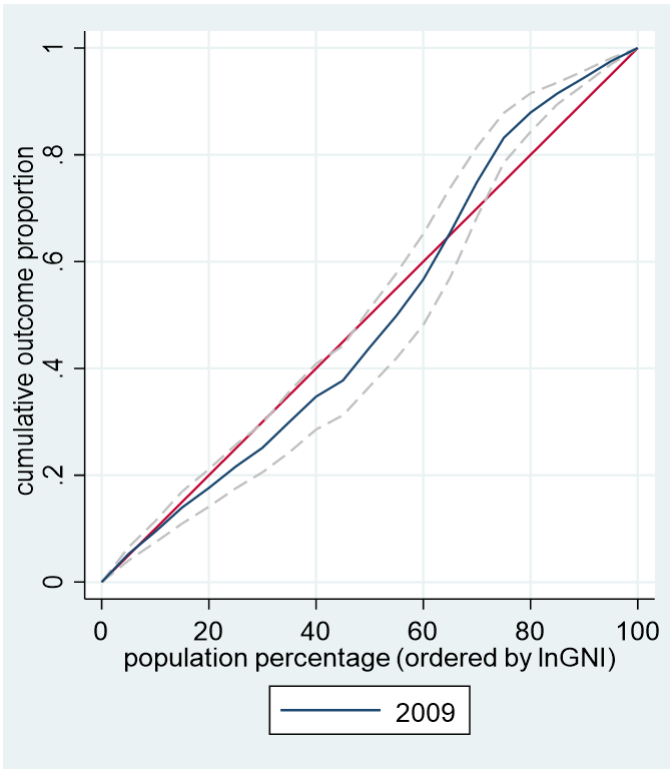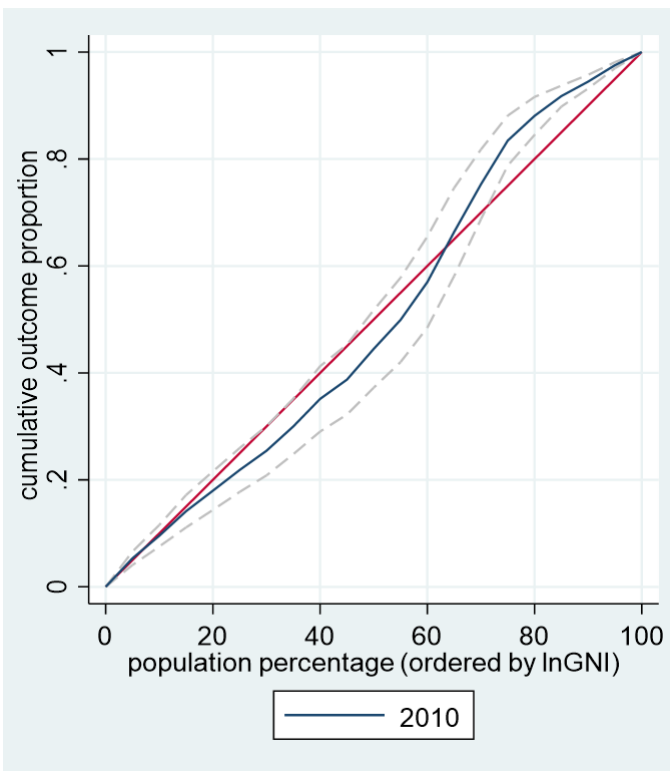

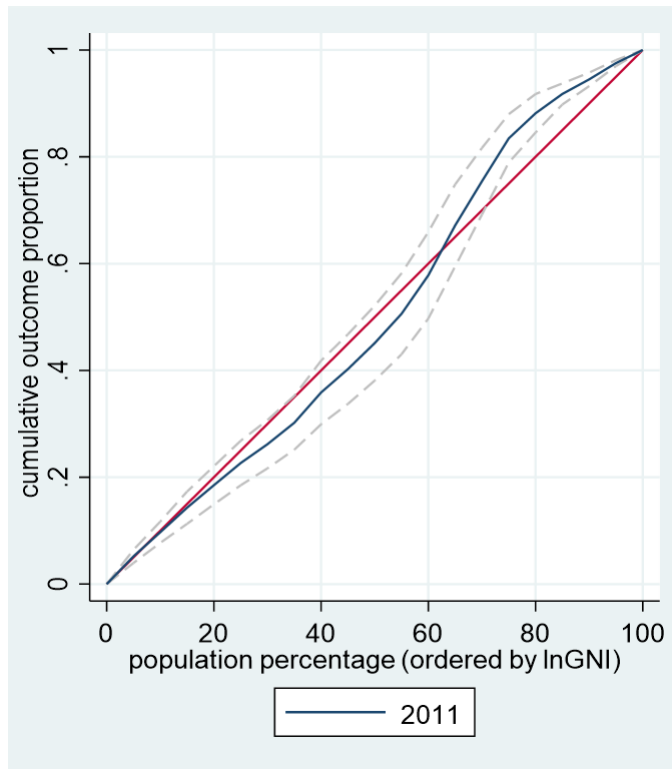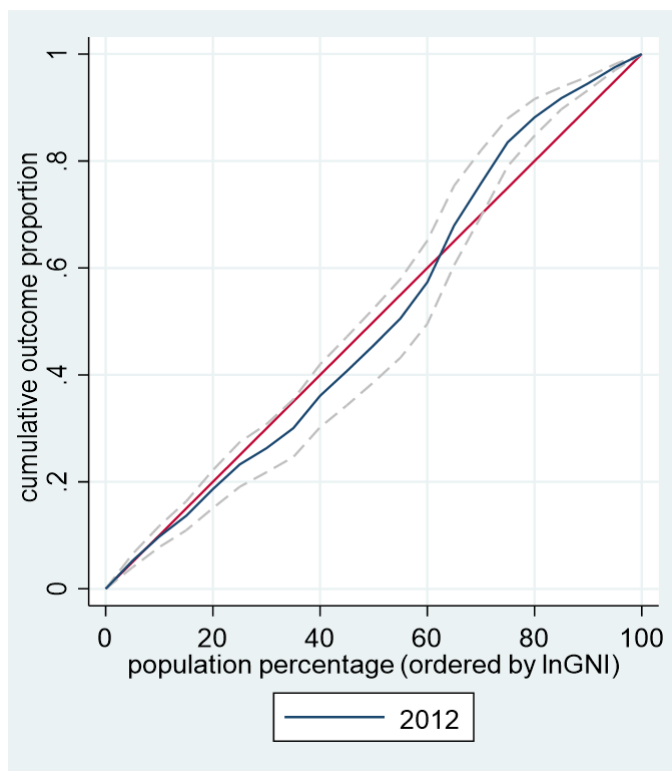

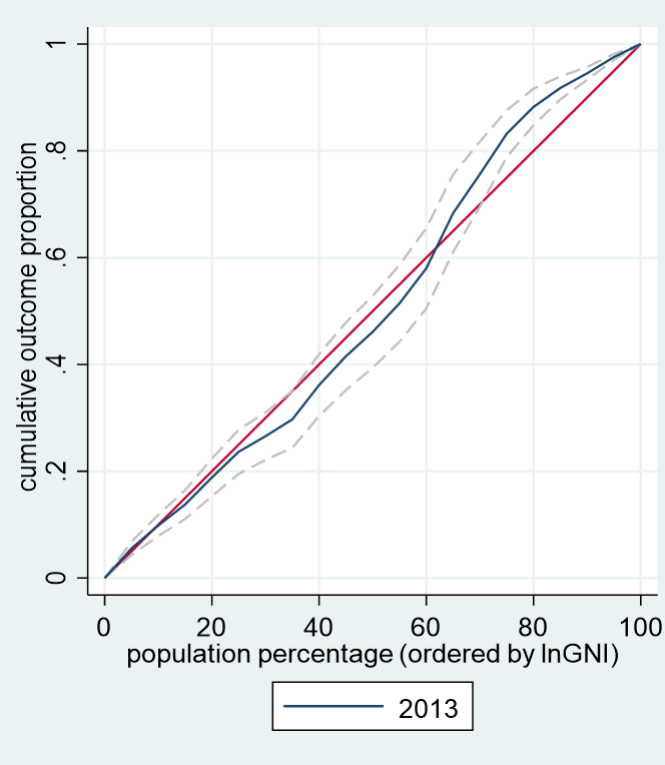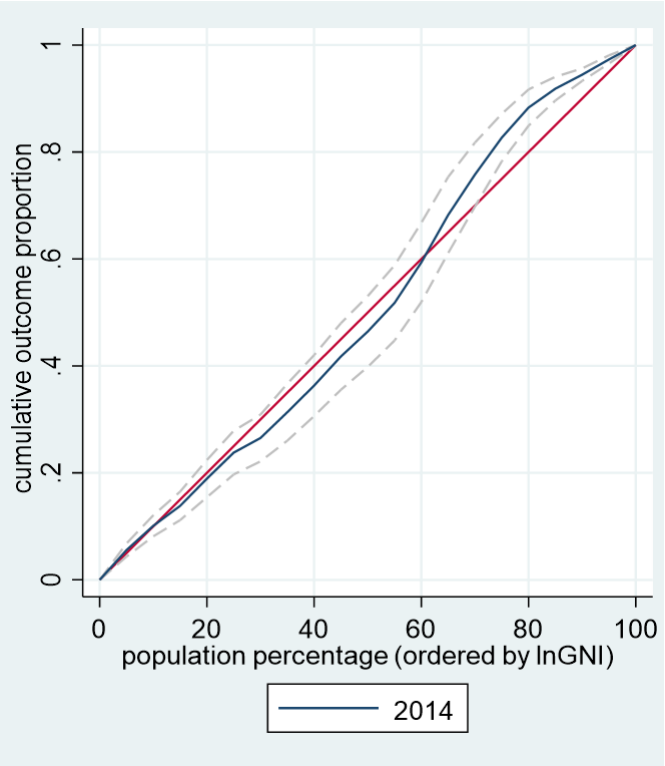

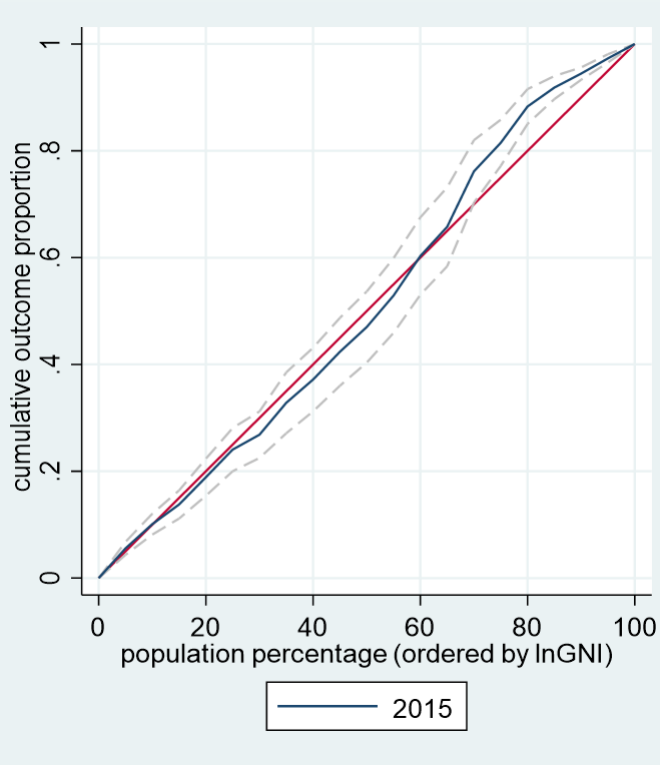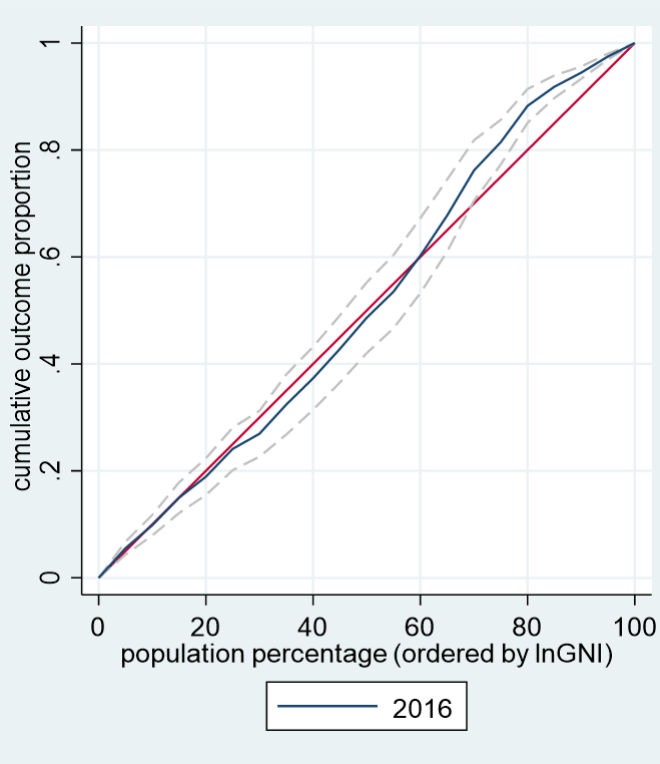

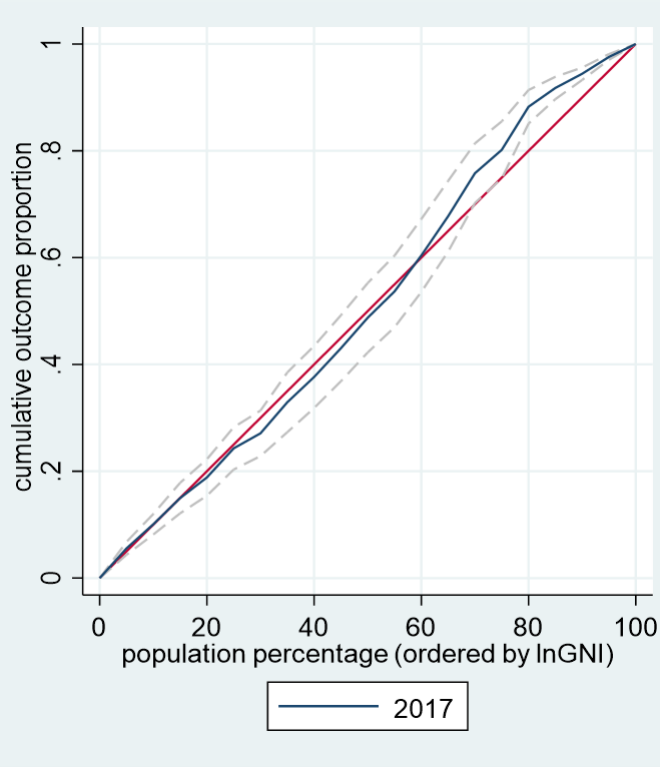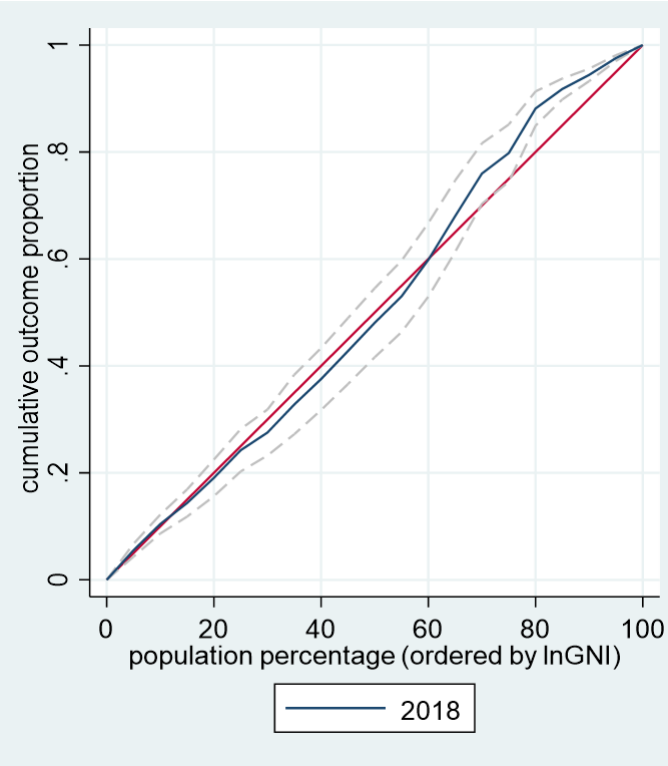

**Figs. S138-155 Concentration curves of age-standardized DALY rates for atrial fibrillation and flutter from 2001 to 2018**

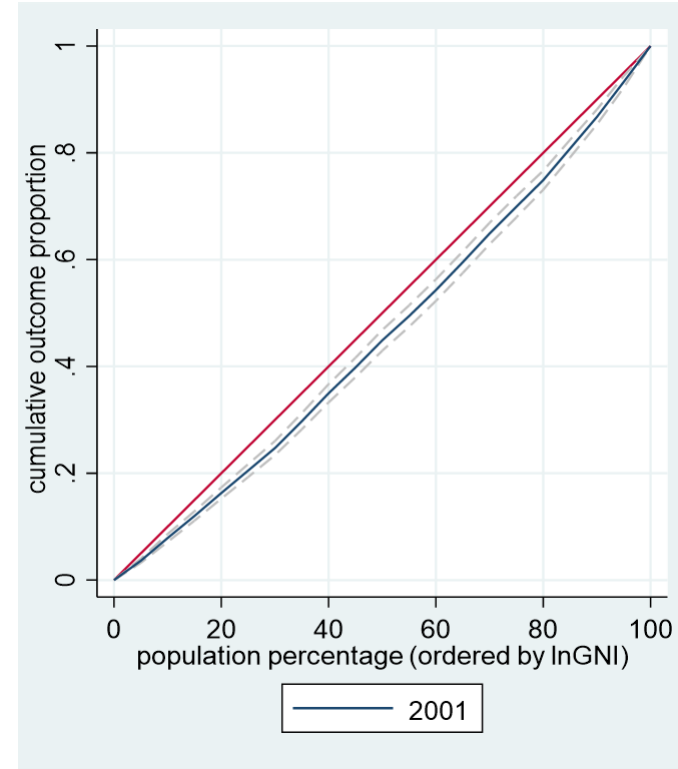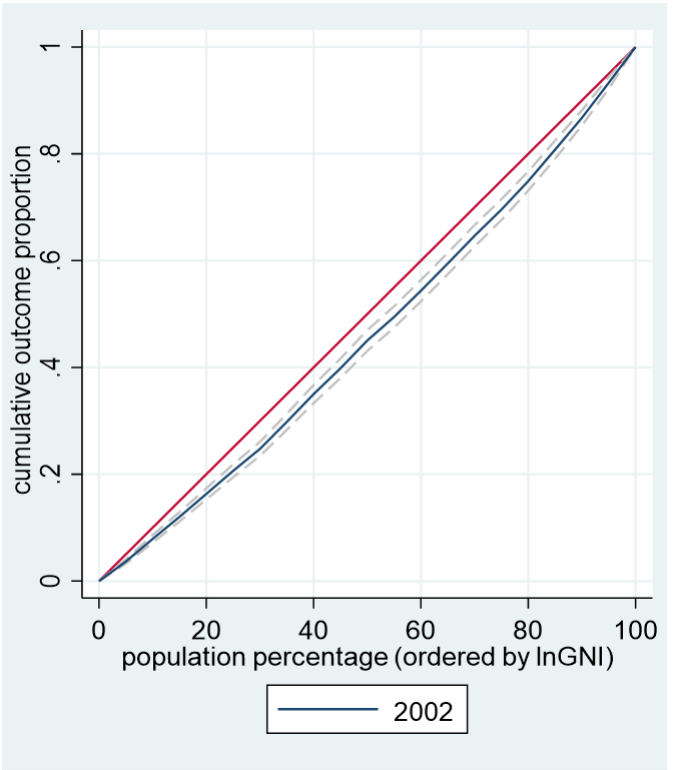

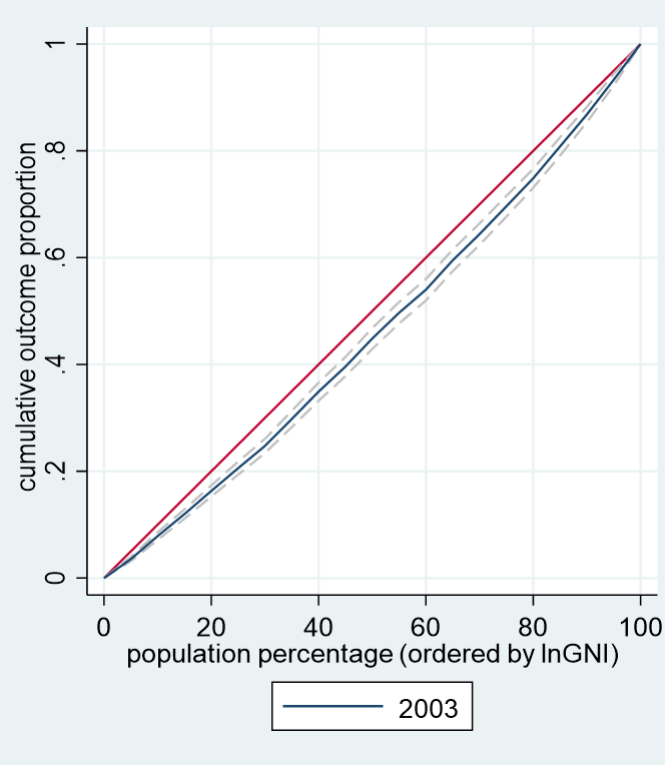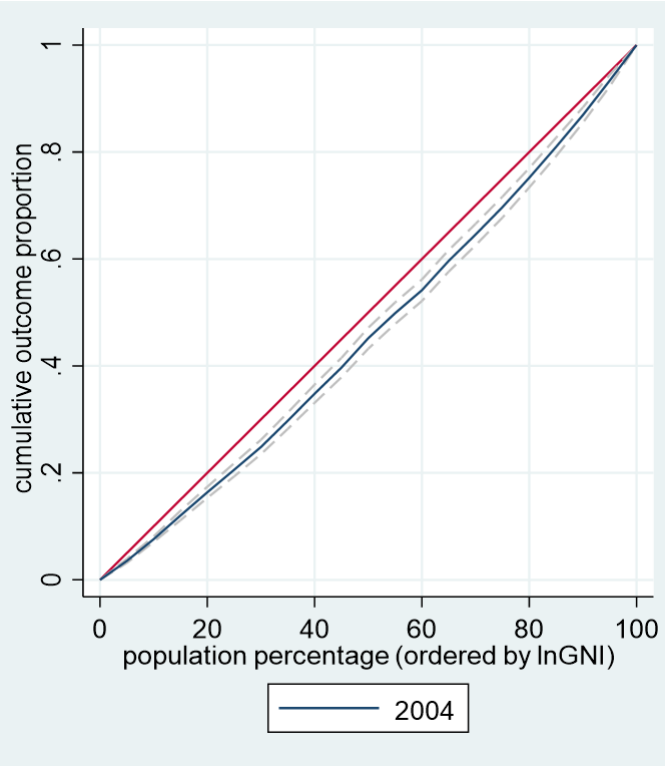

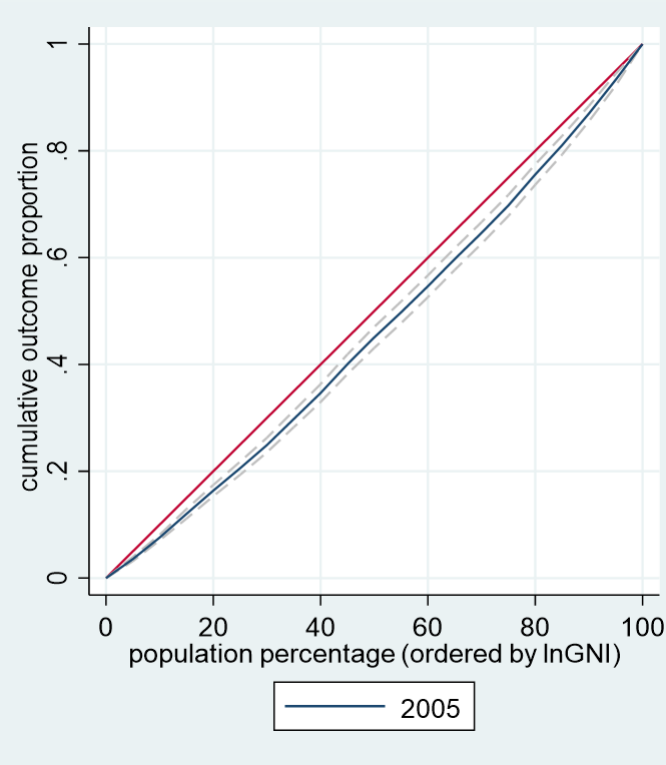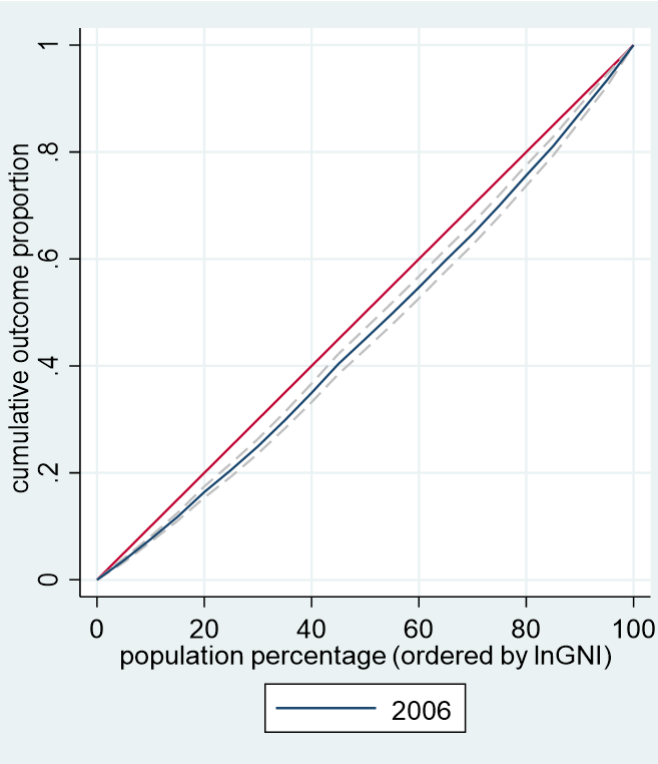

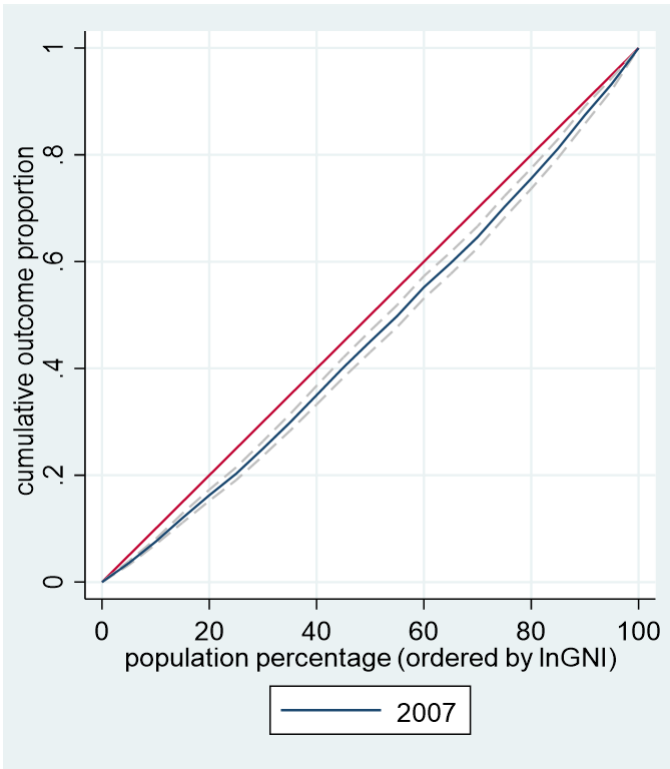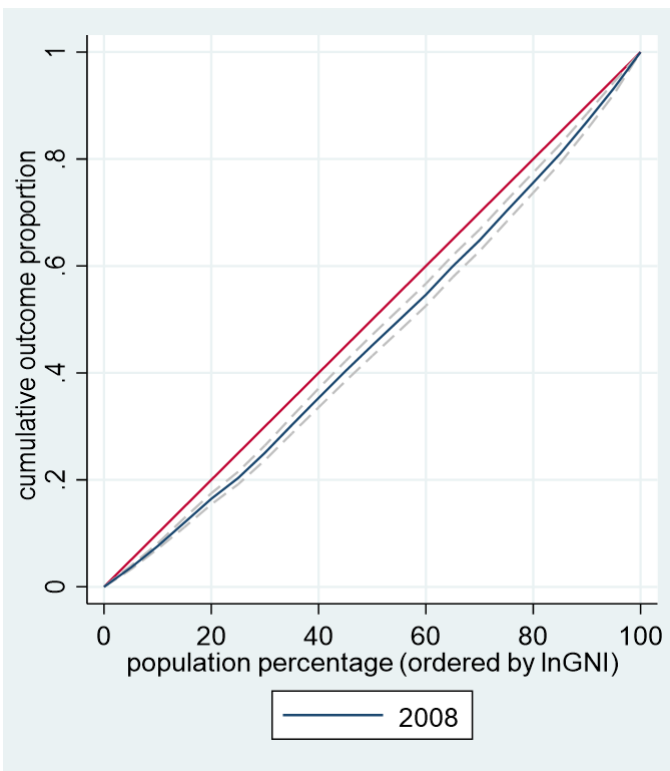

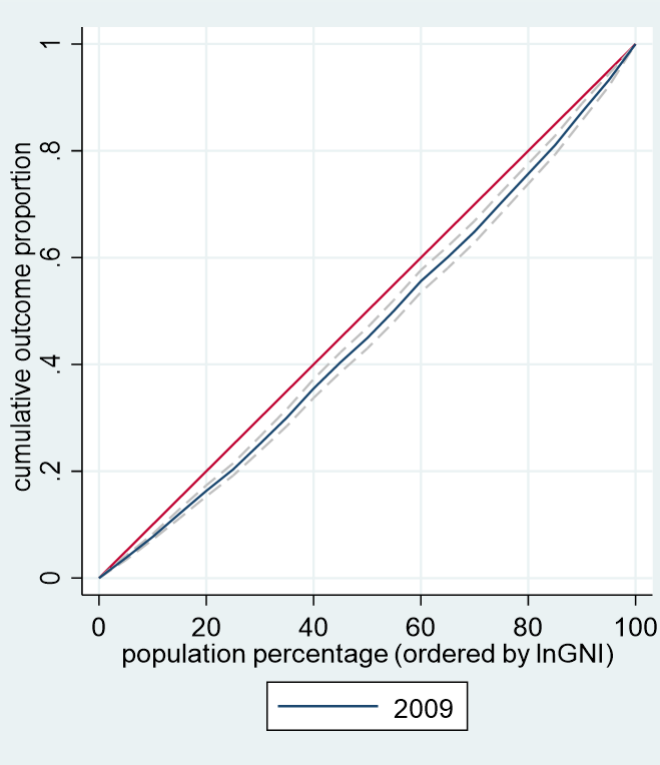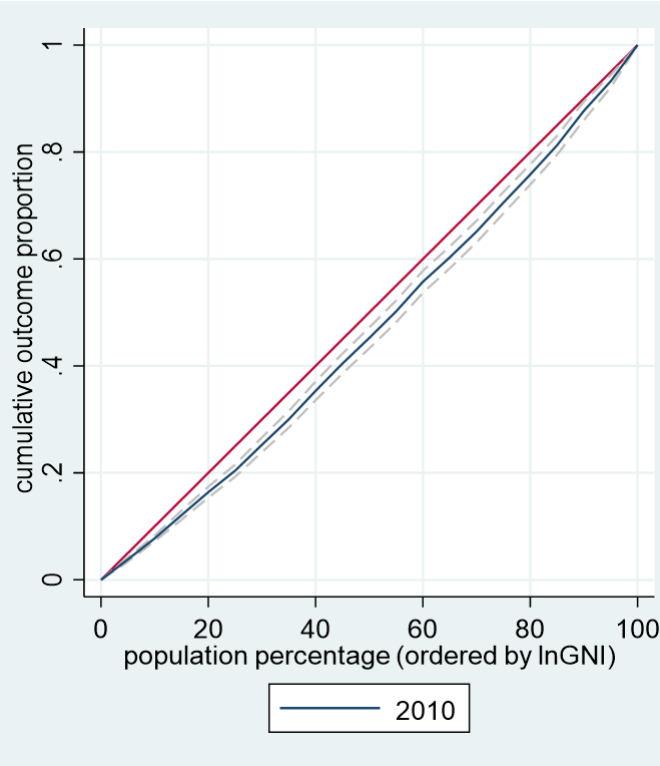

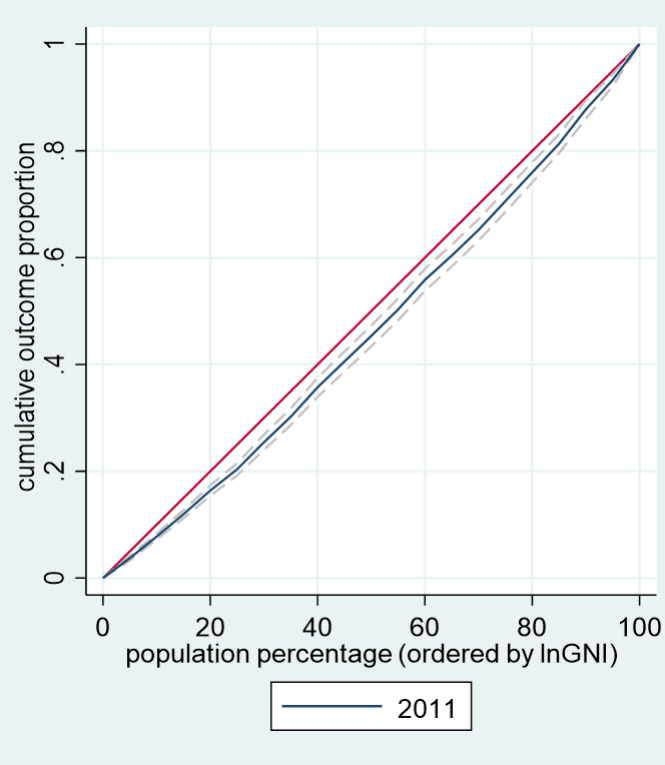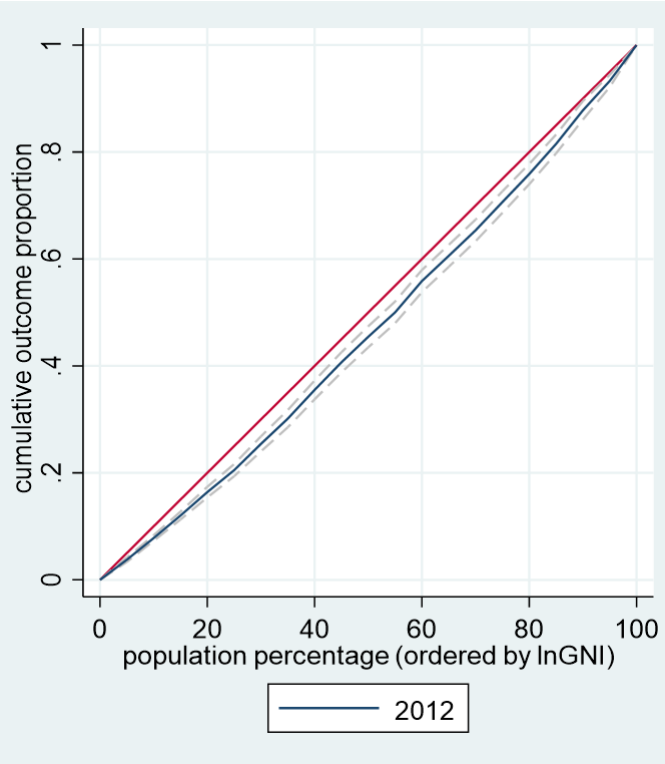

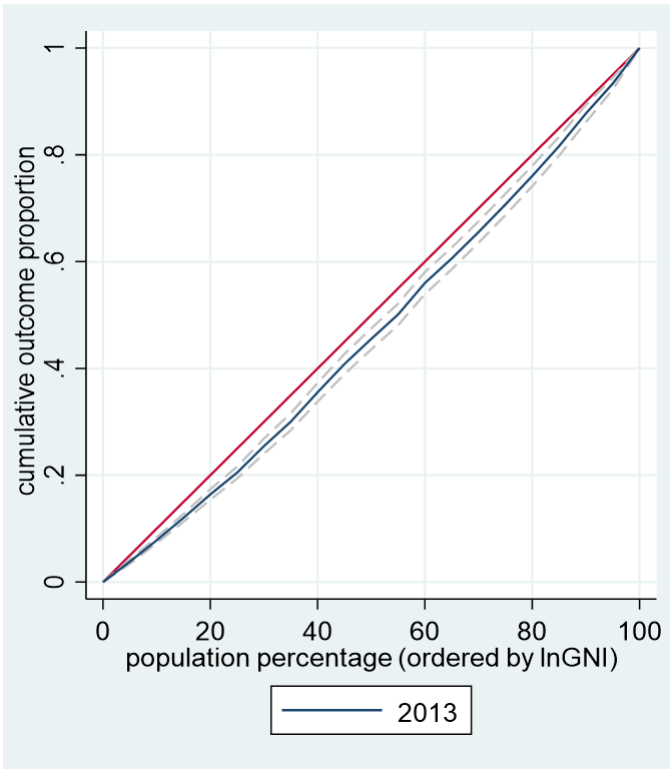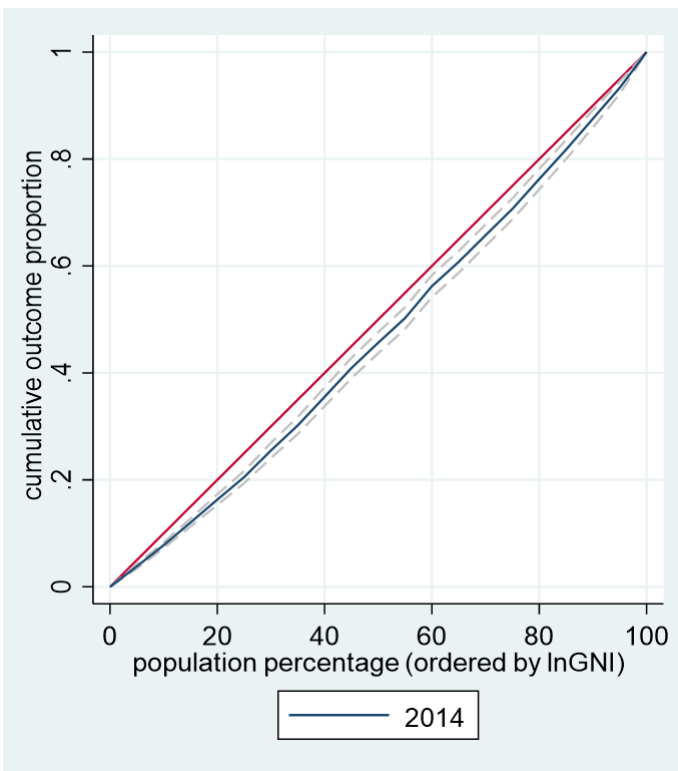

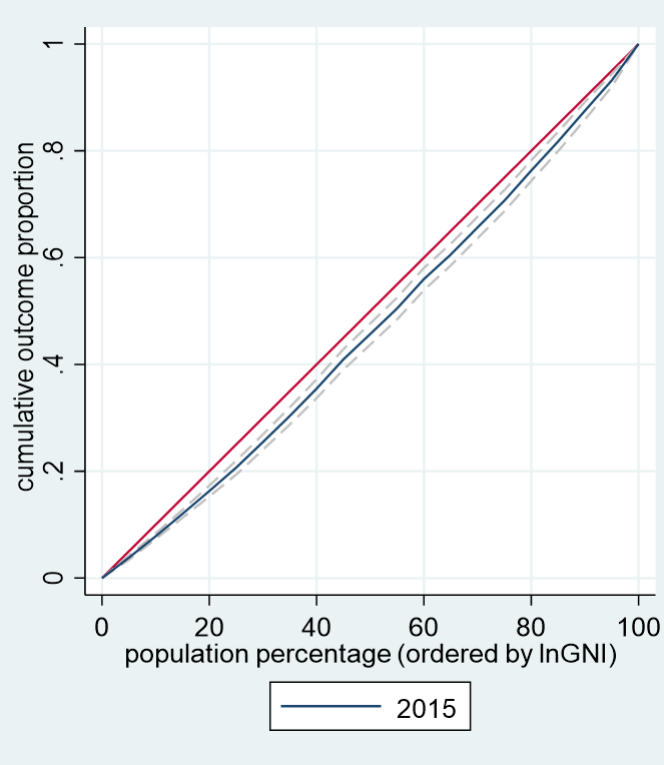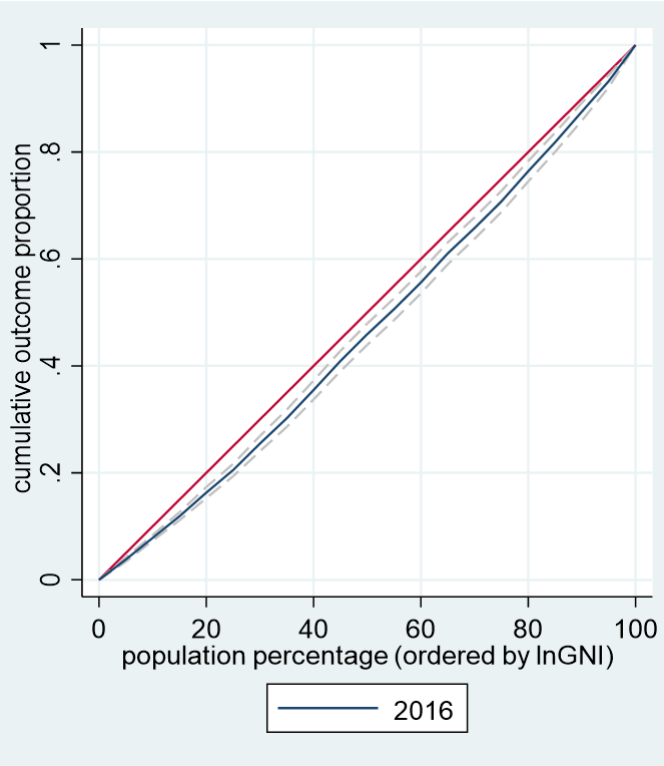

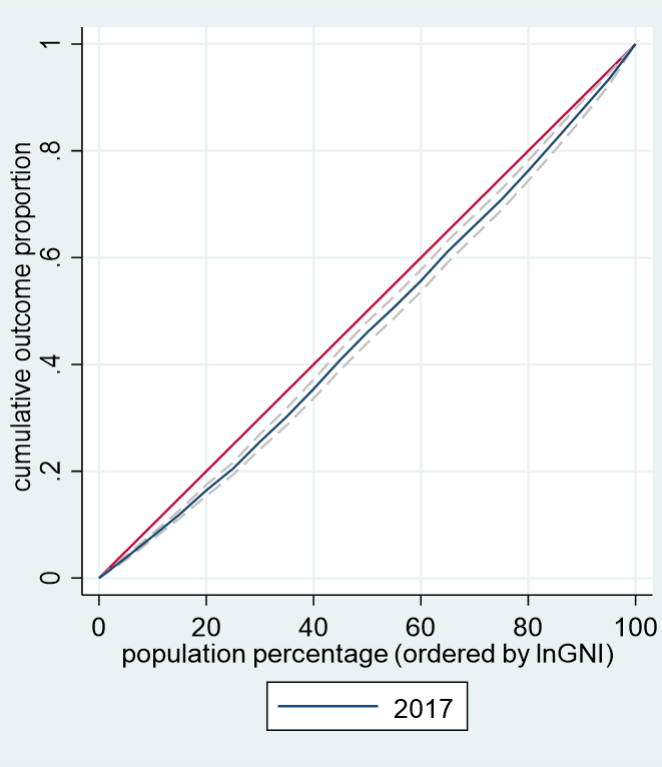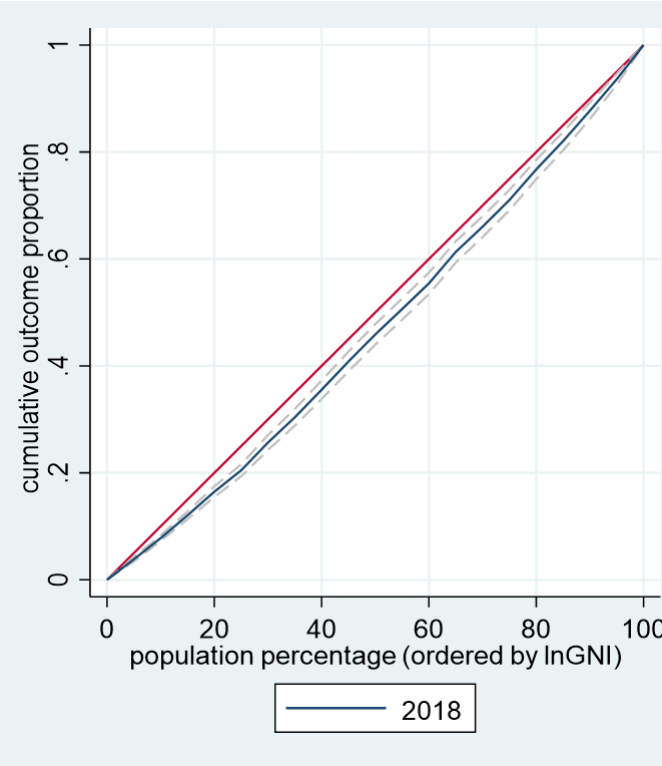

**Figs. S156-173 Concentration curves of age-standardized DALY rates for aortic aneurysm from 2001 to 2018**

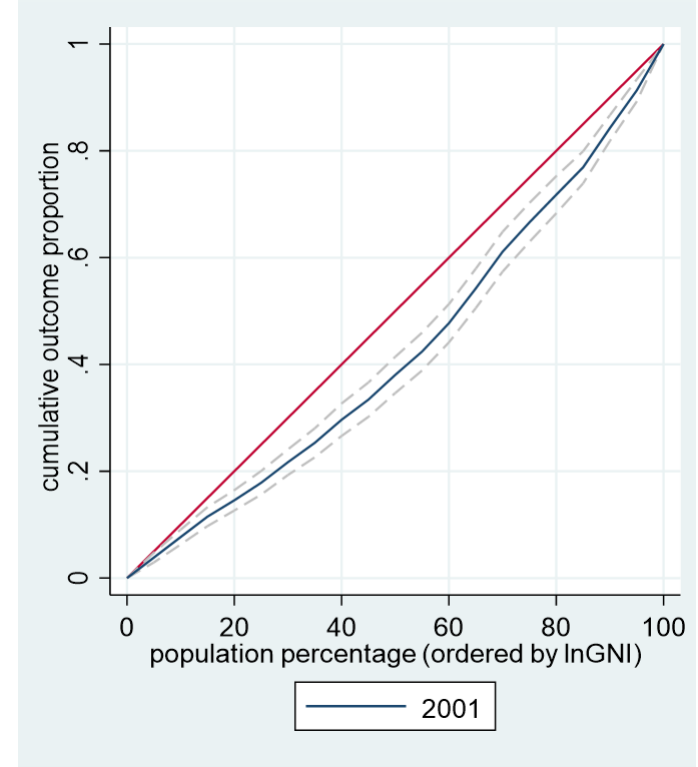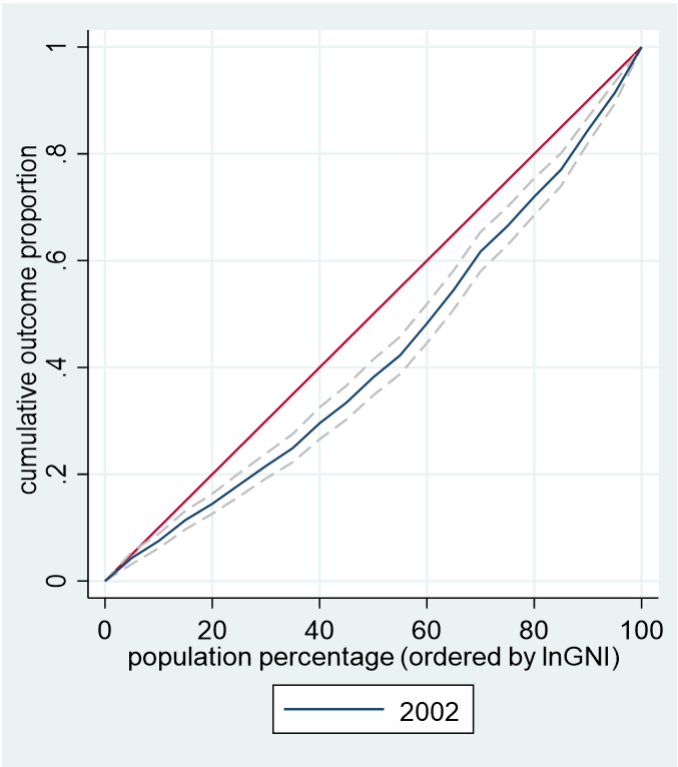

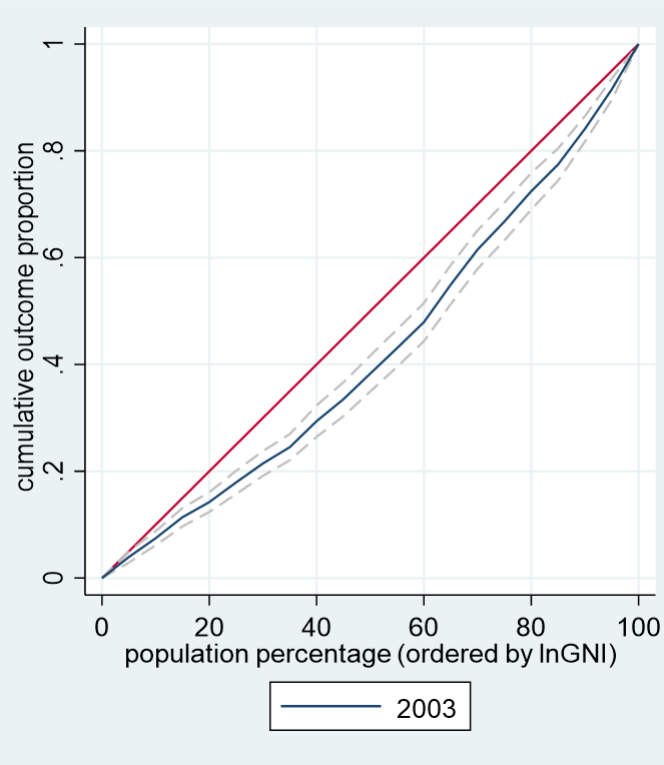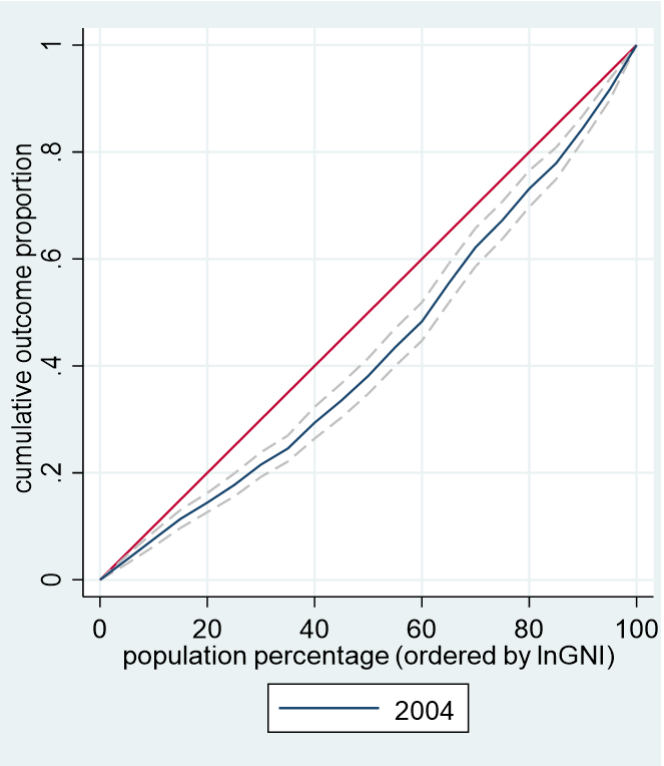

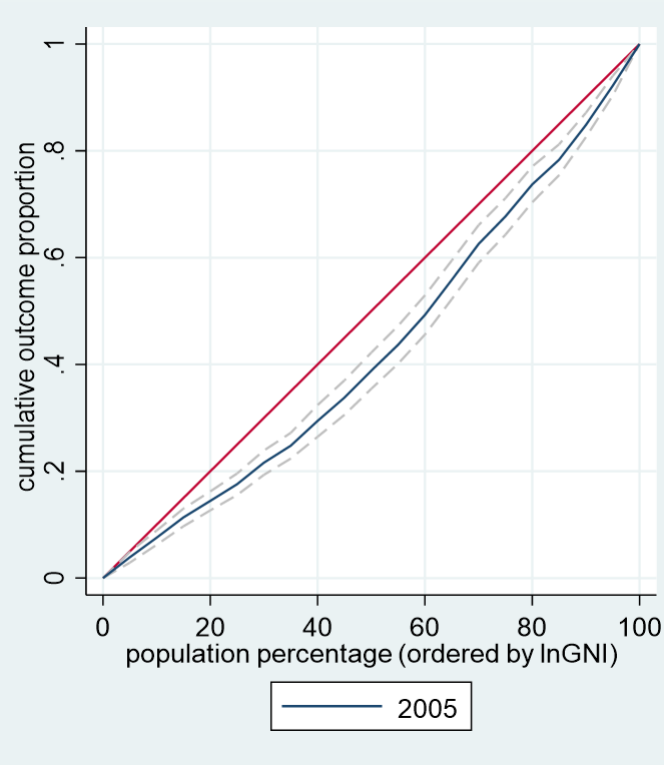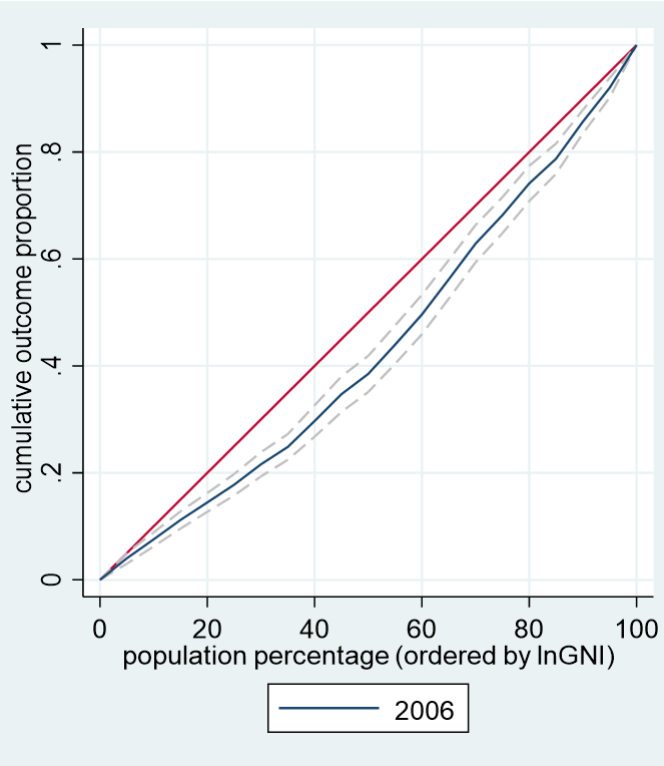

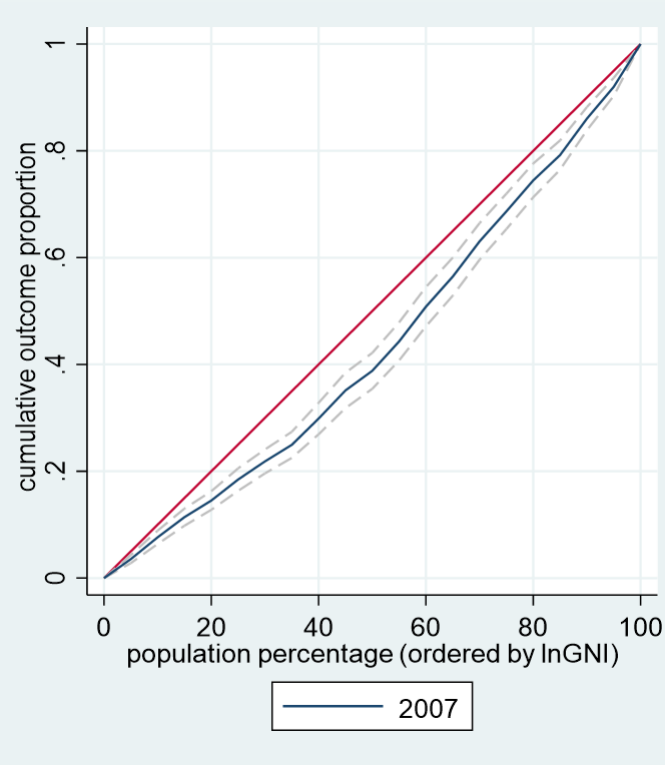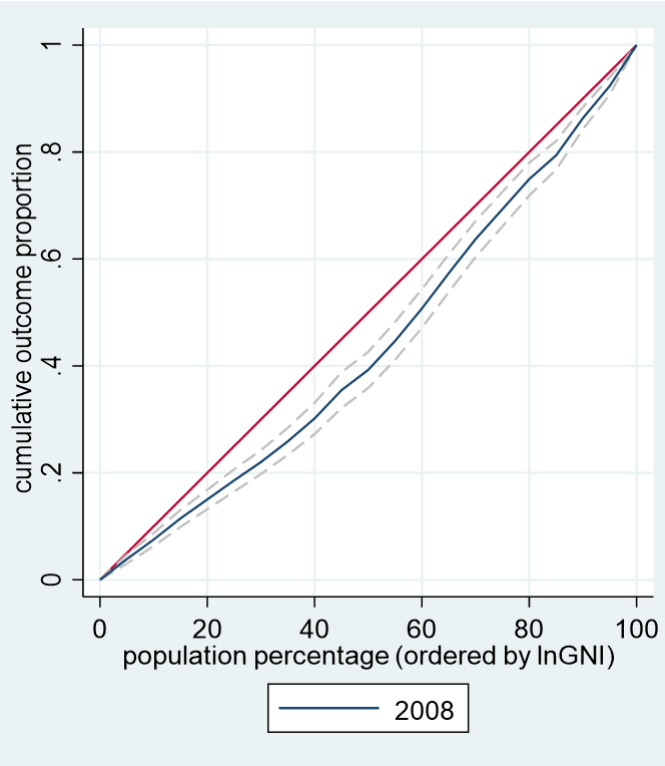

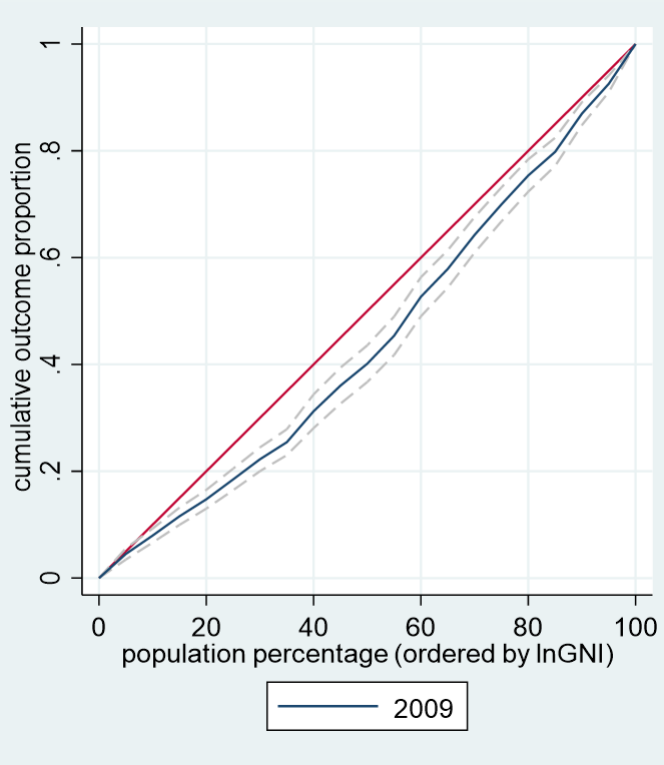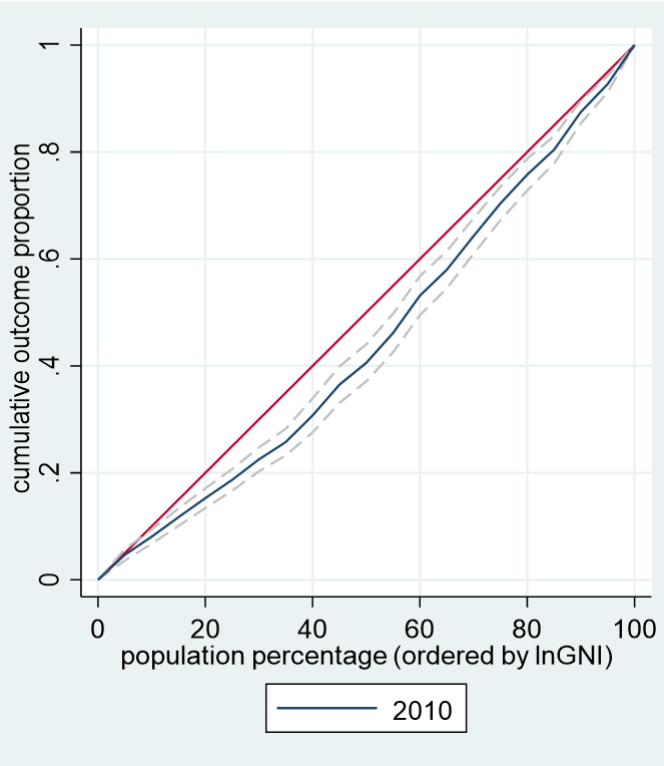

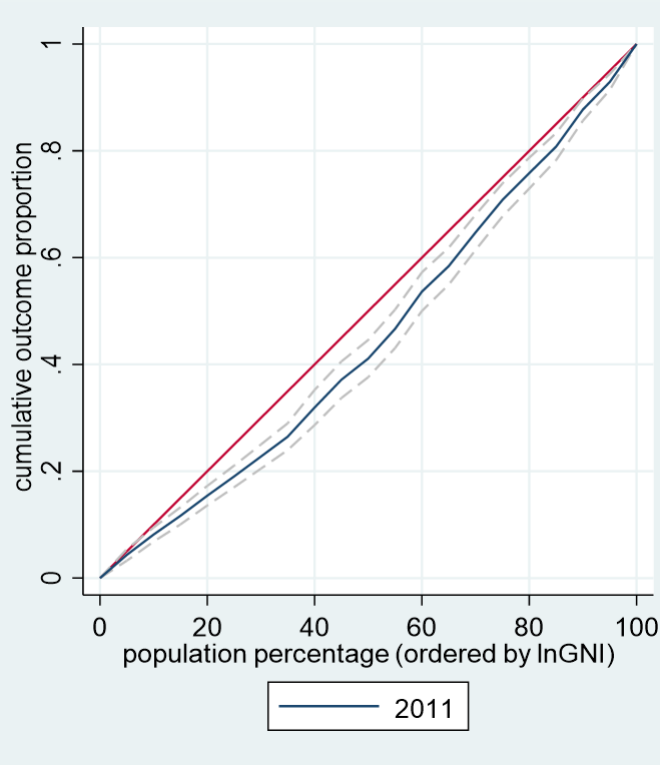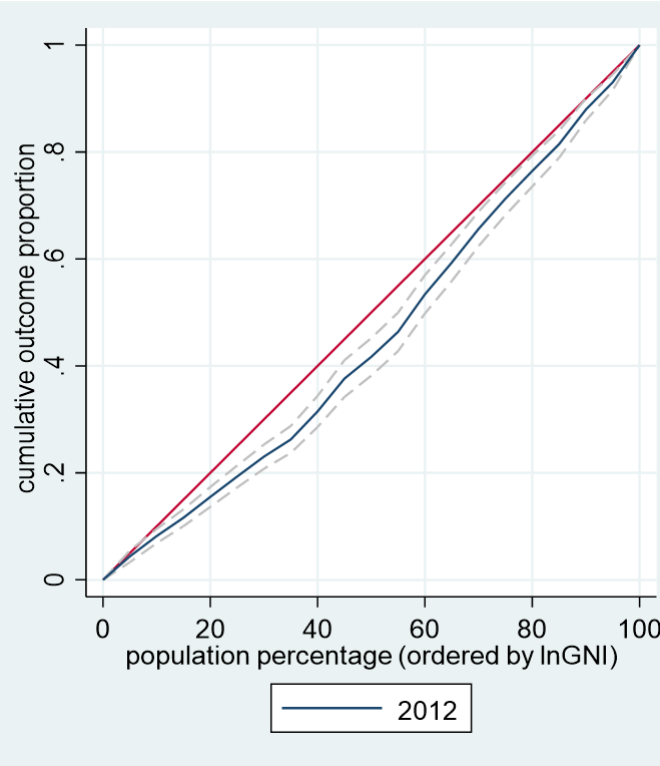

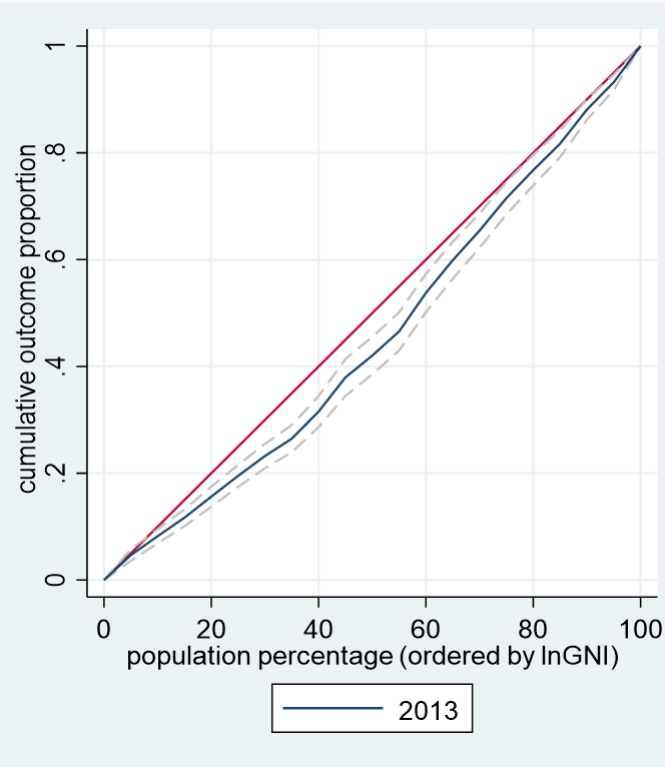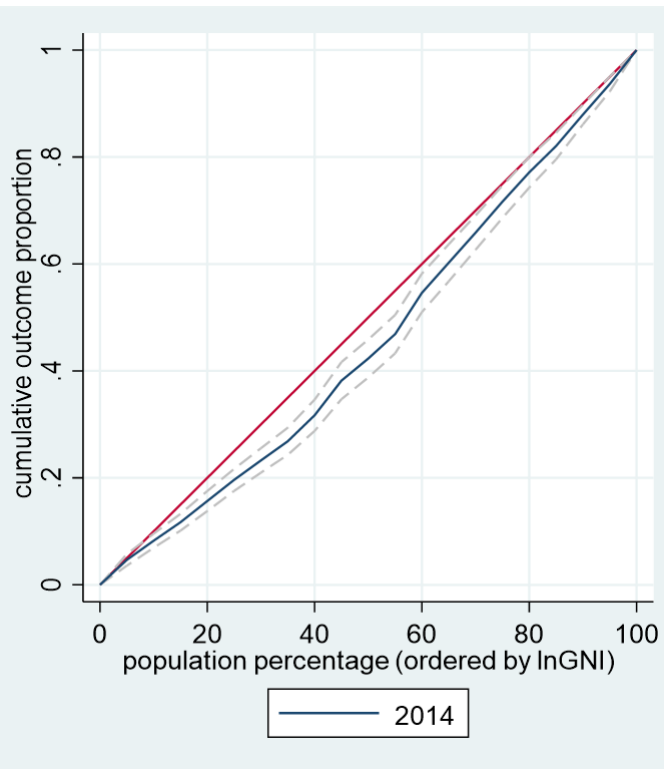

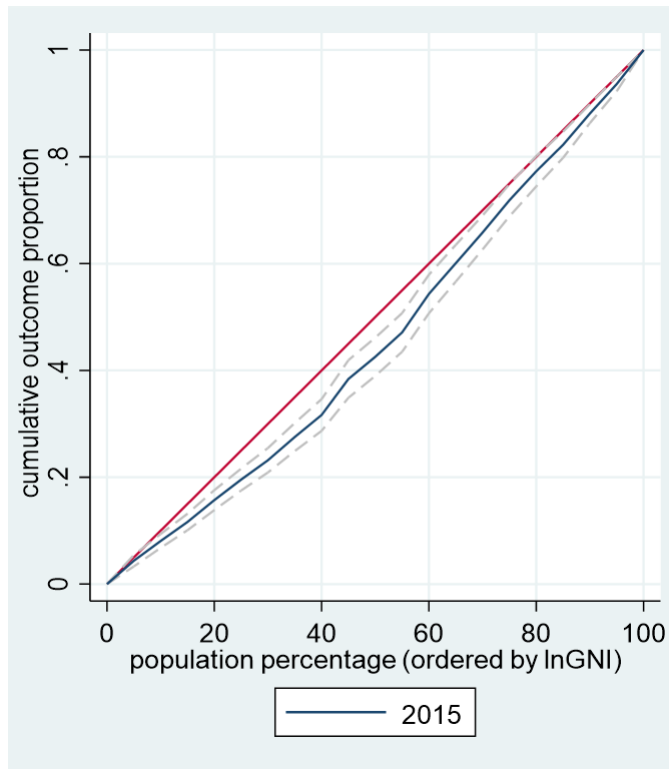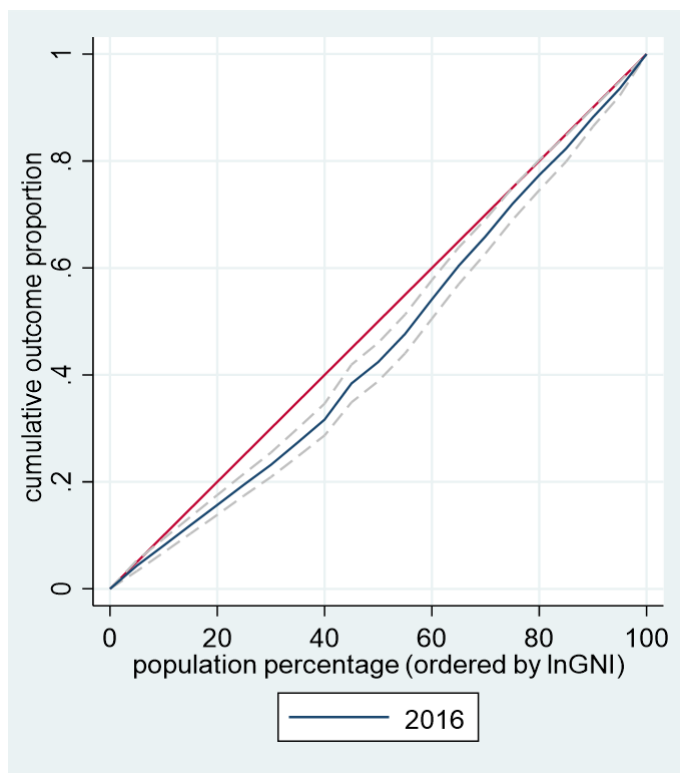

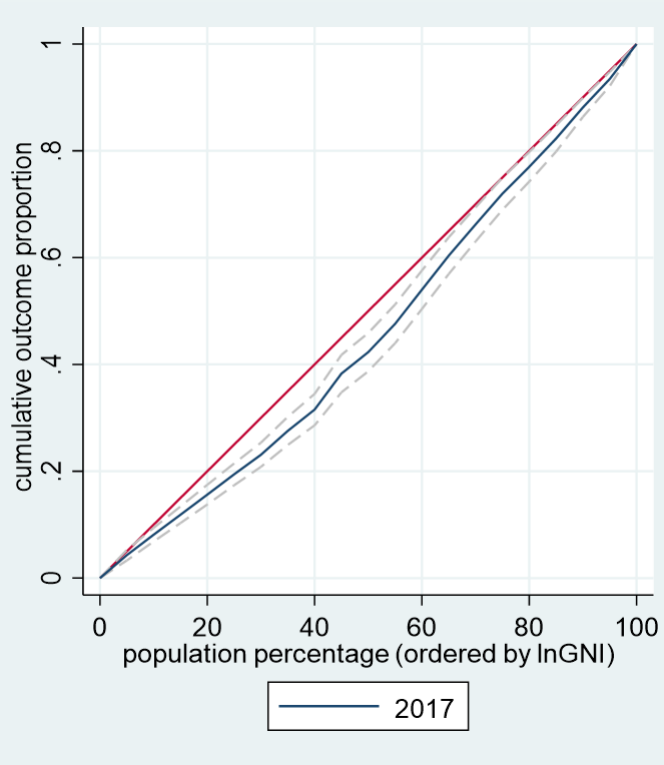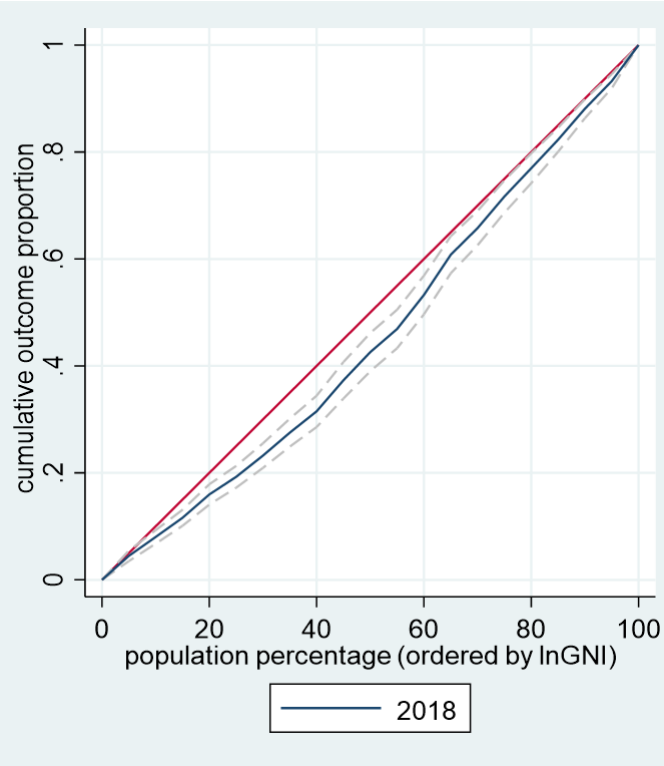

**Figs. S174-191 Concentration curves of age-standardized DALY rates for peripheral artery disease from 2001 to 2018**

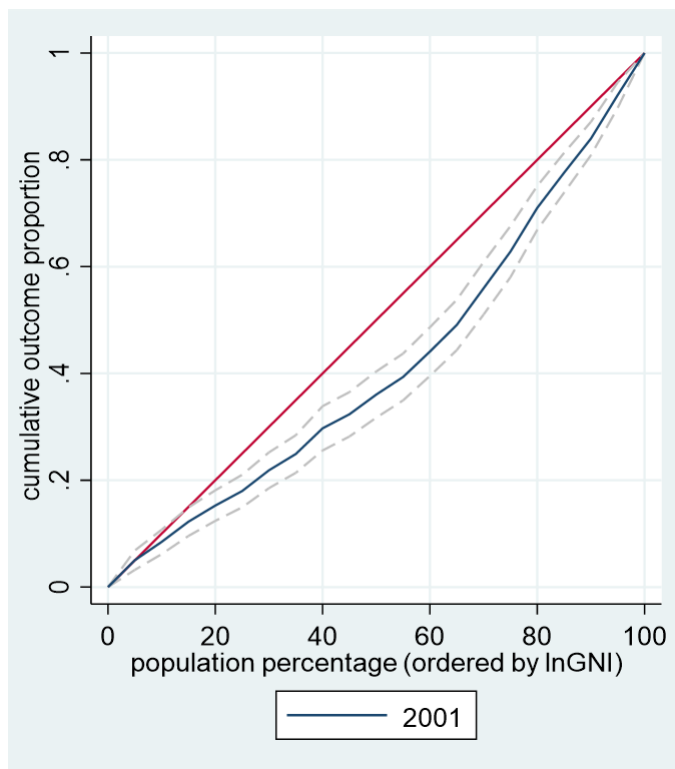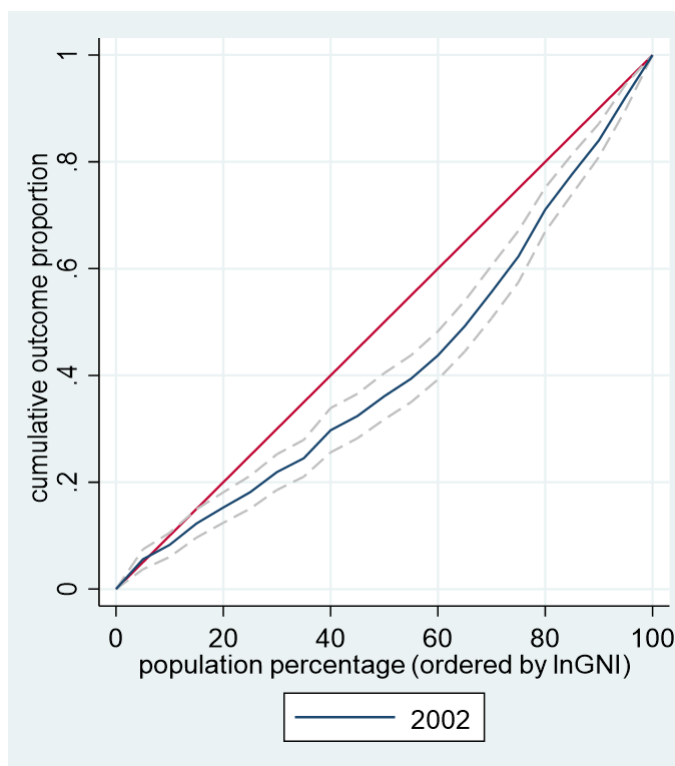

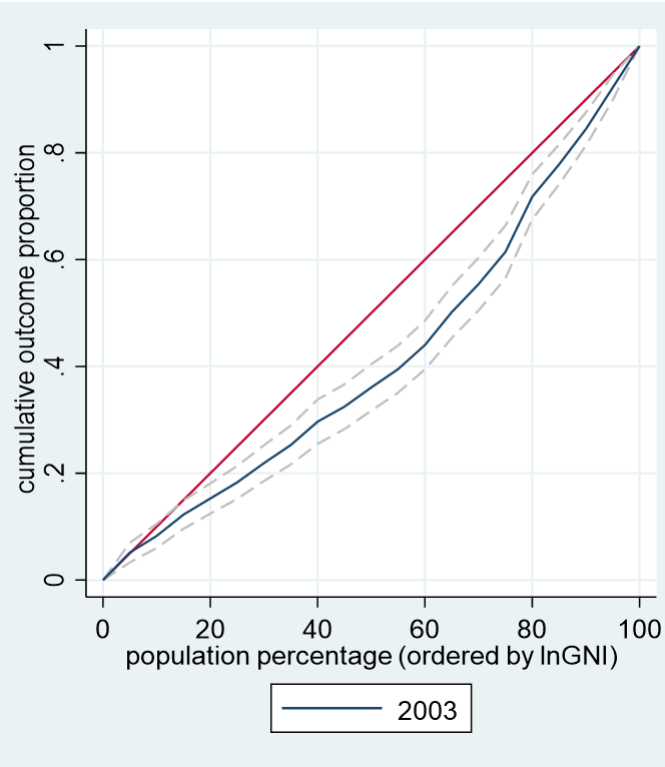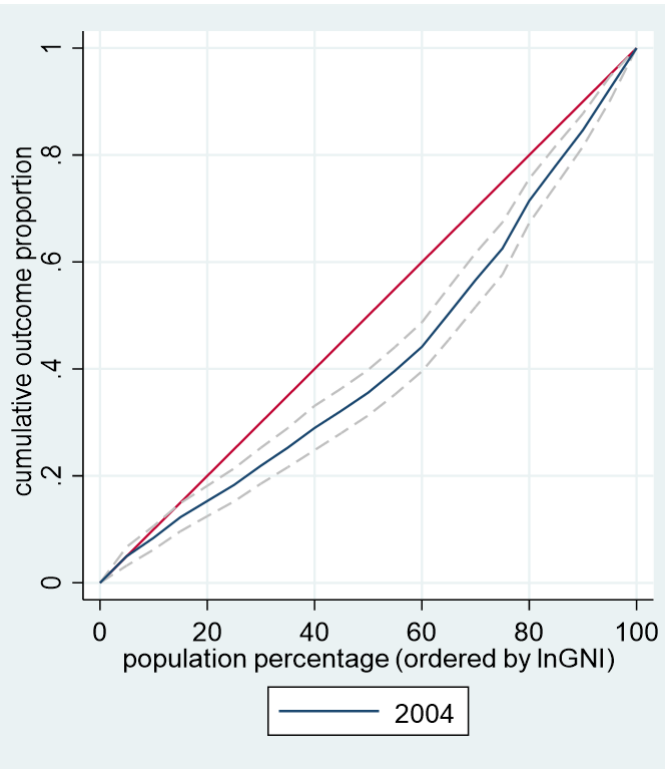

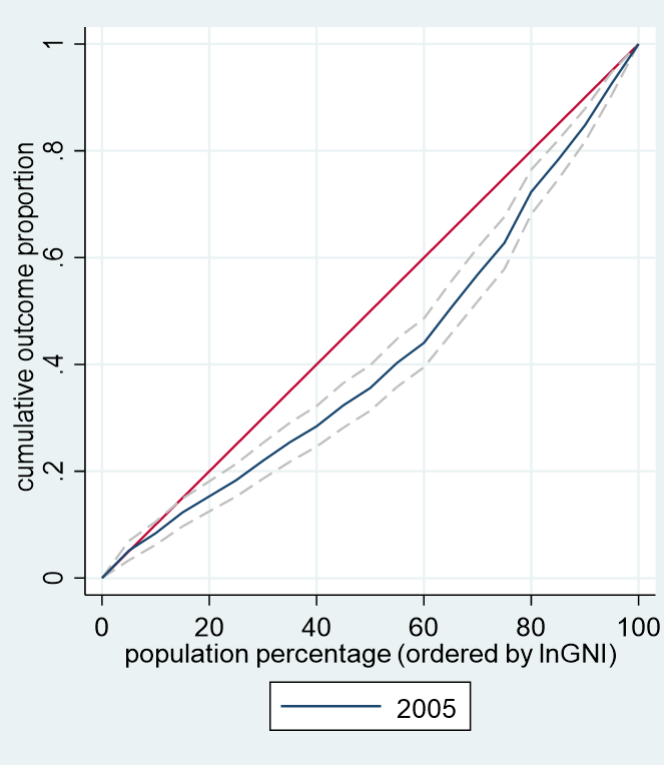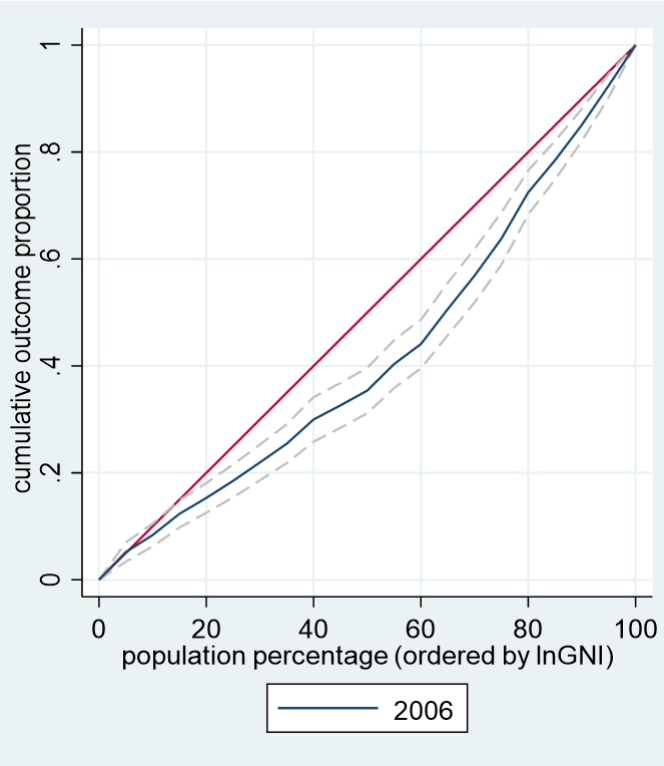

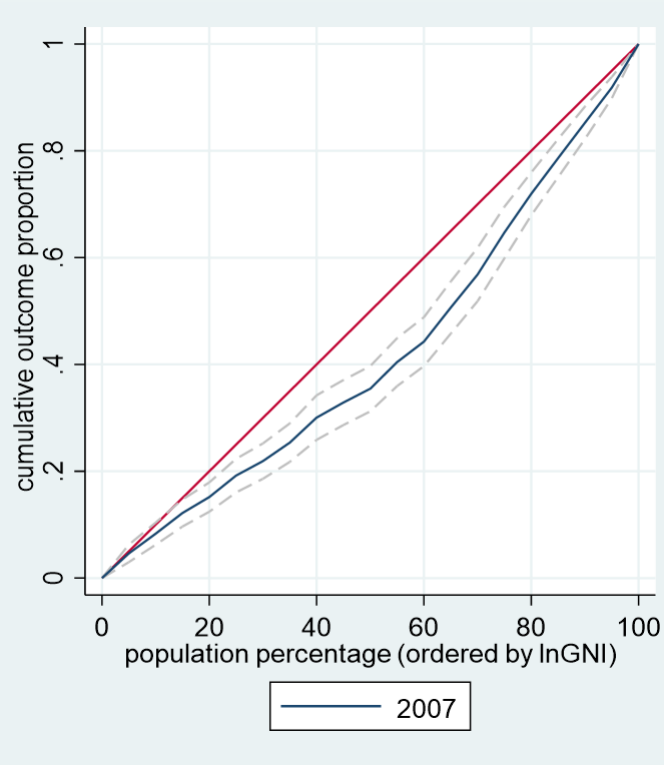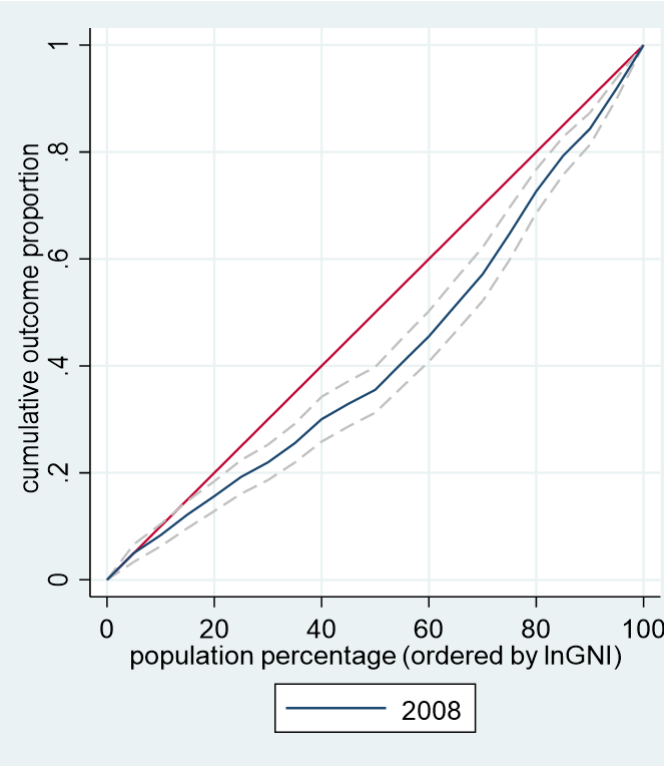

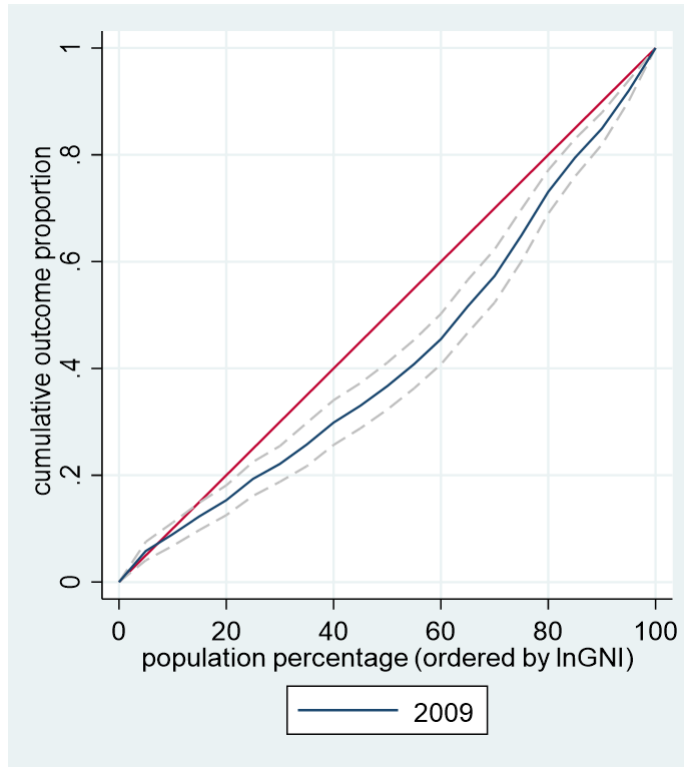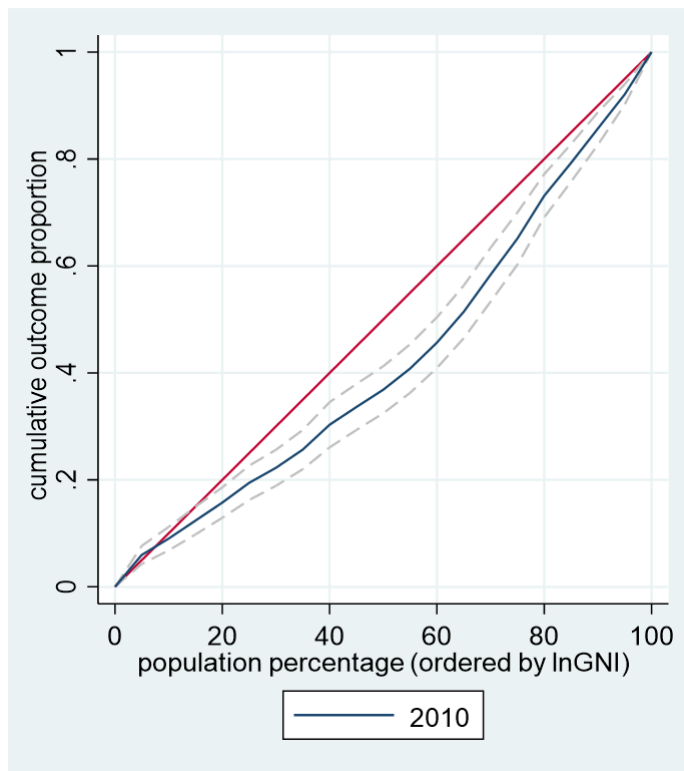

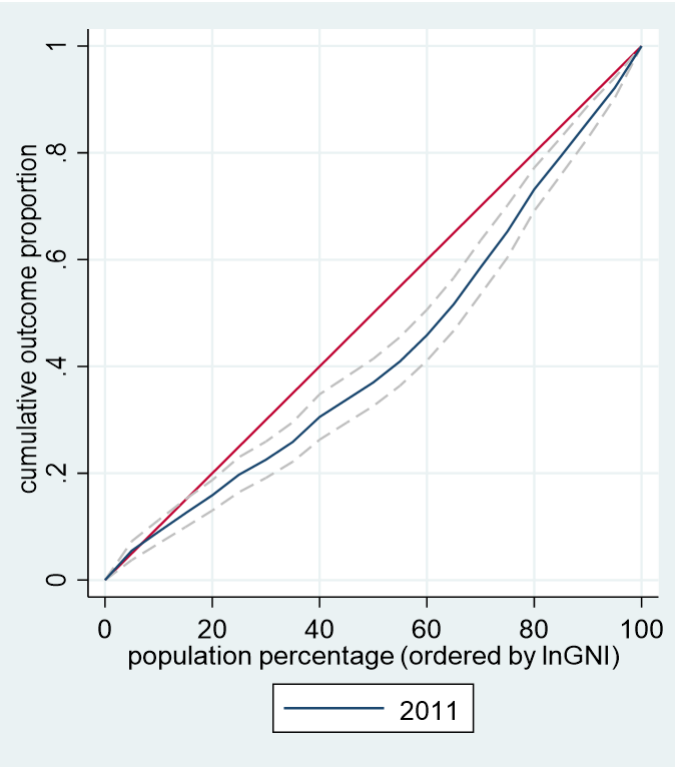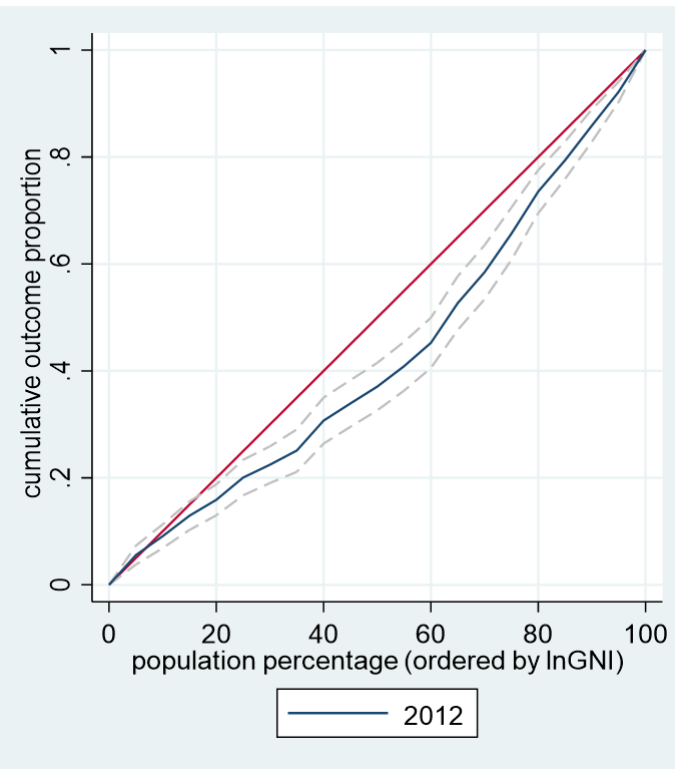

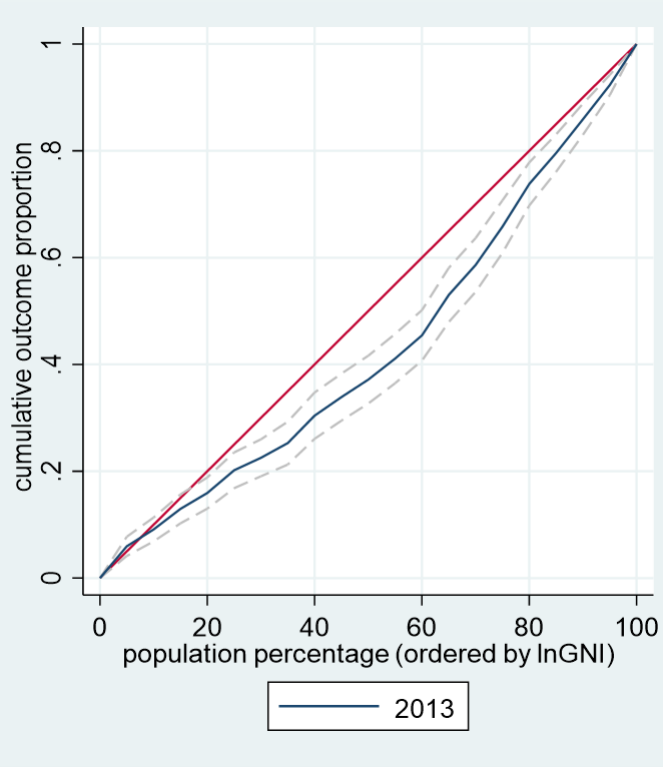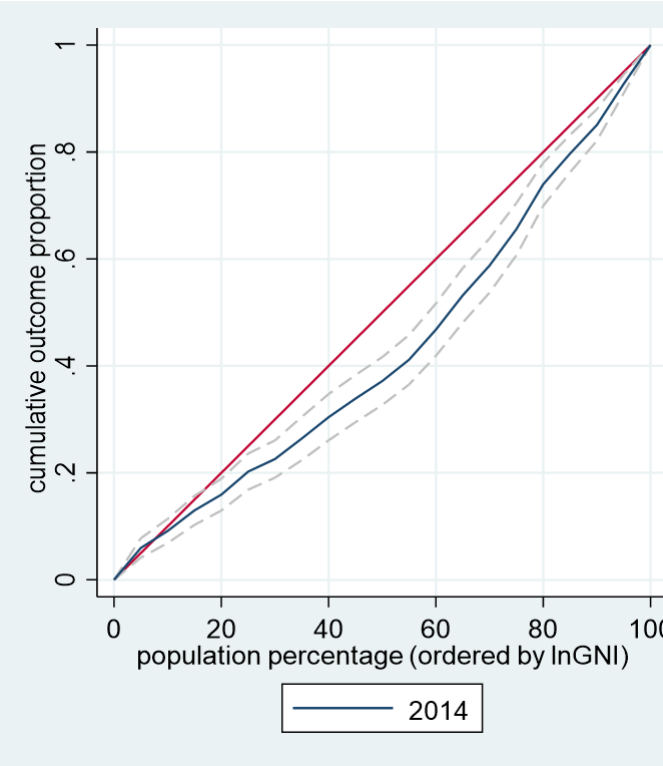

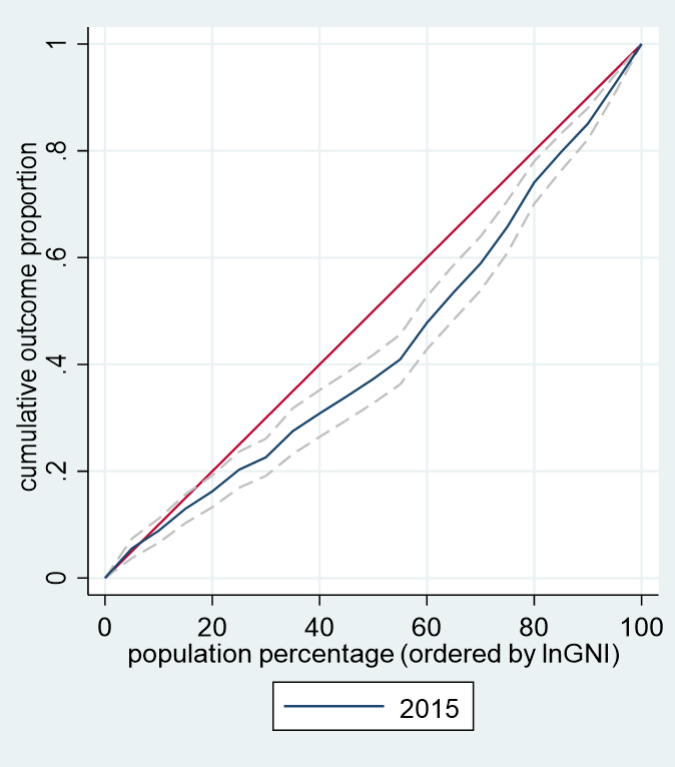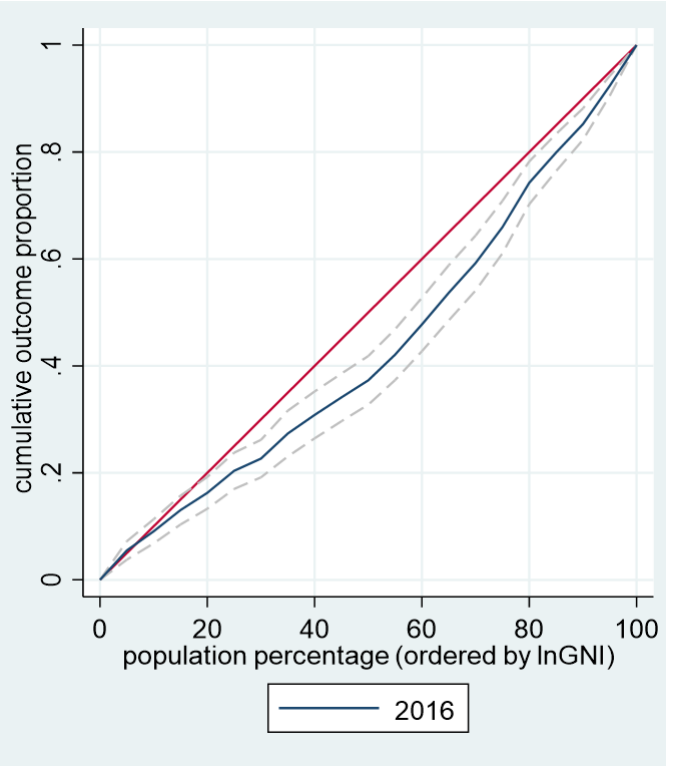

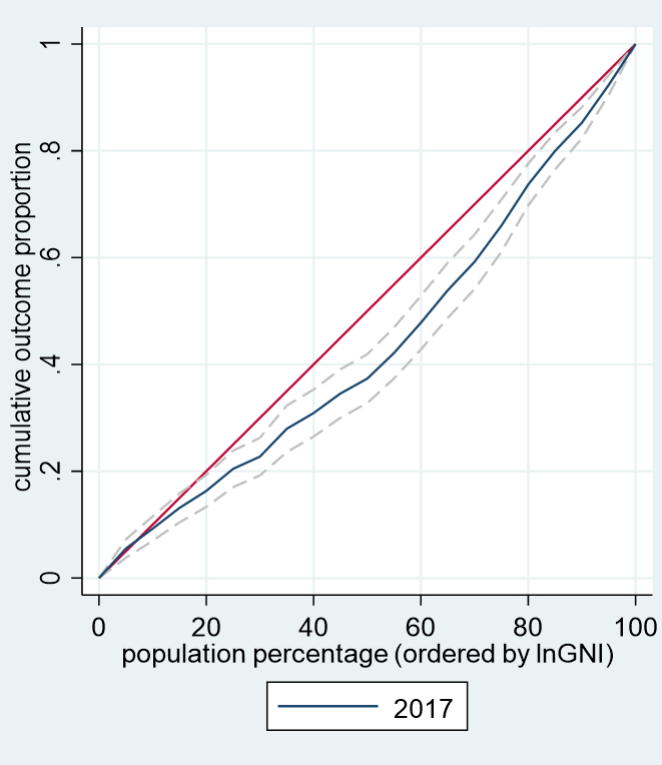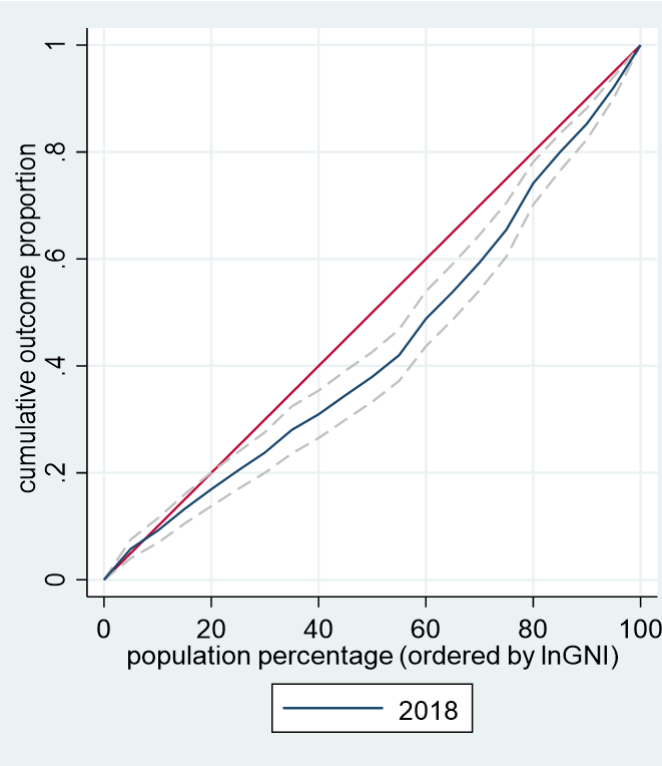

**Figs. S192-209 Concentration curves of age-standardized DALY rates for endocarditis from 2001 to 2018**

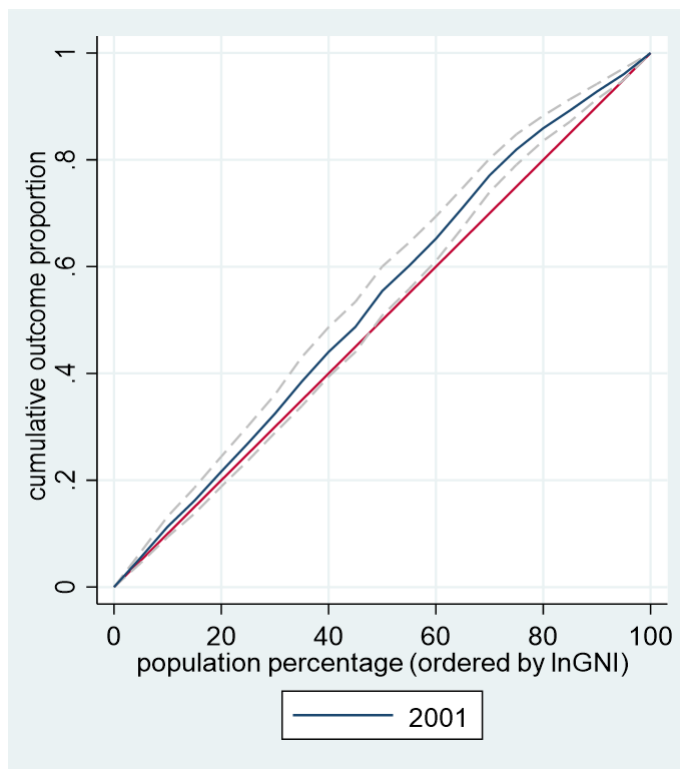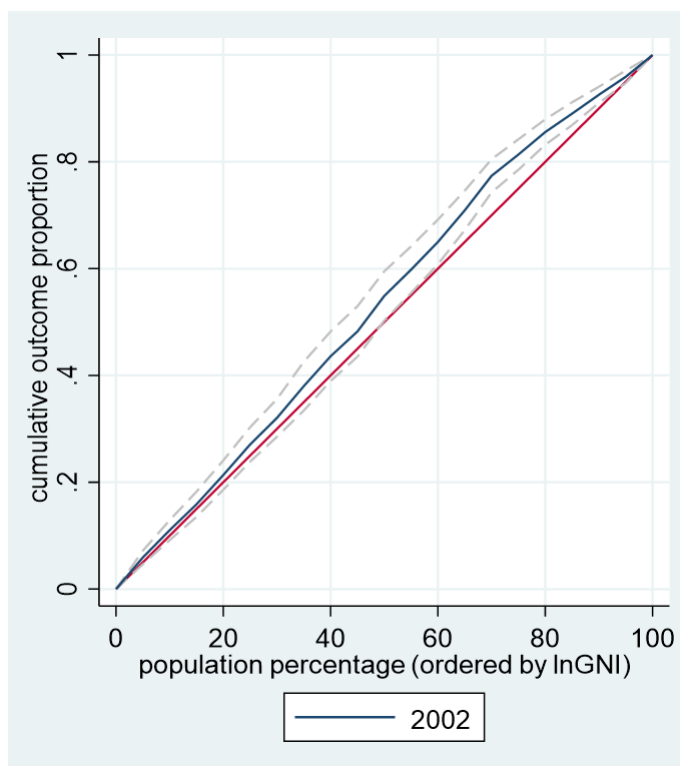

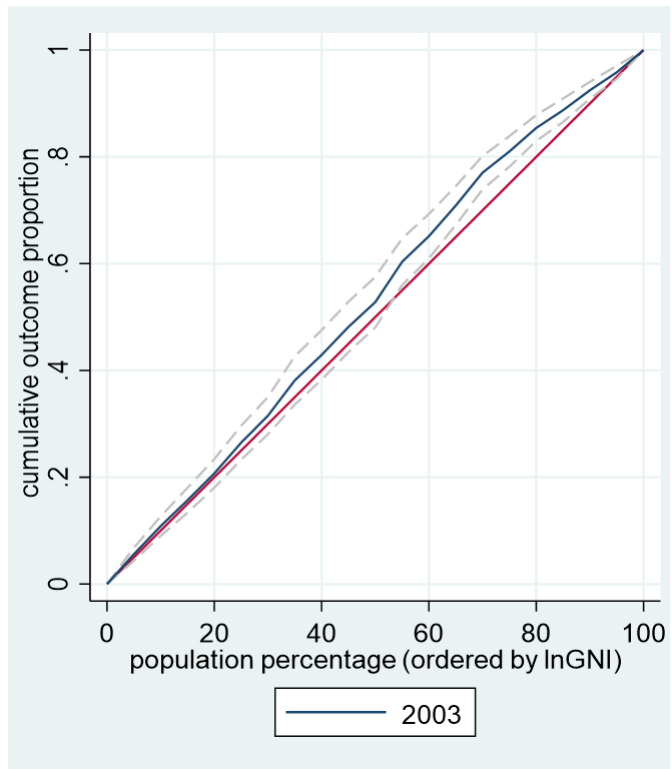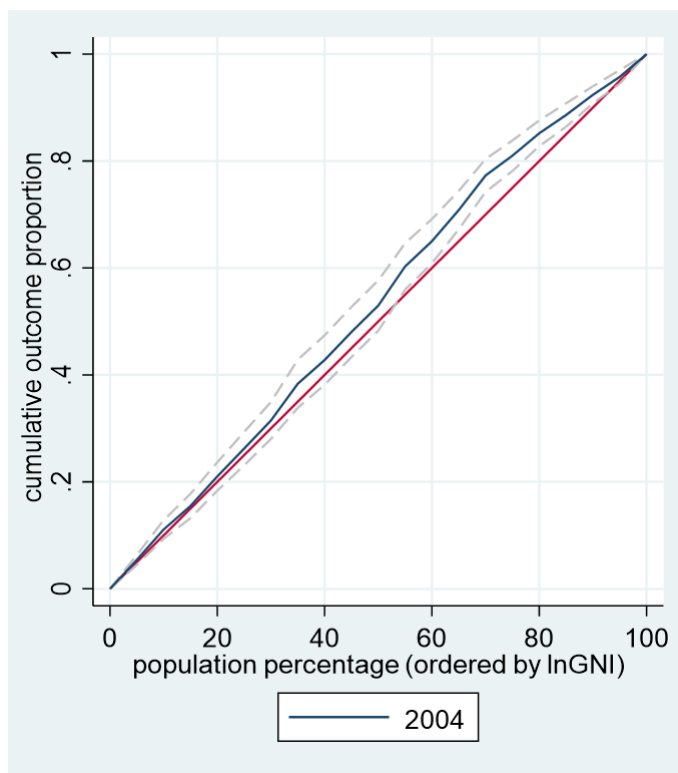

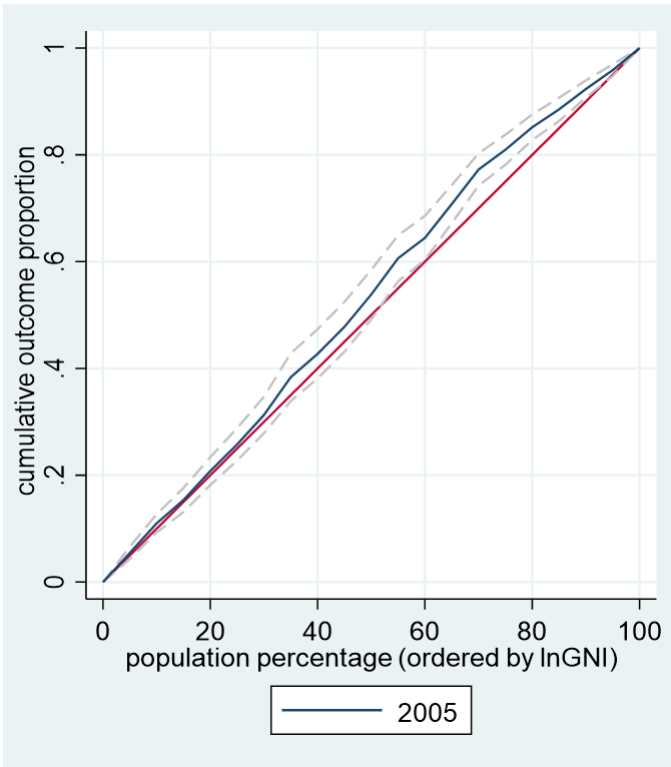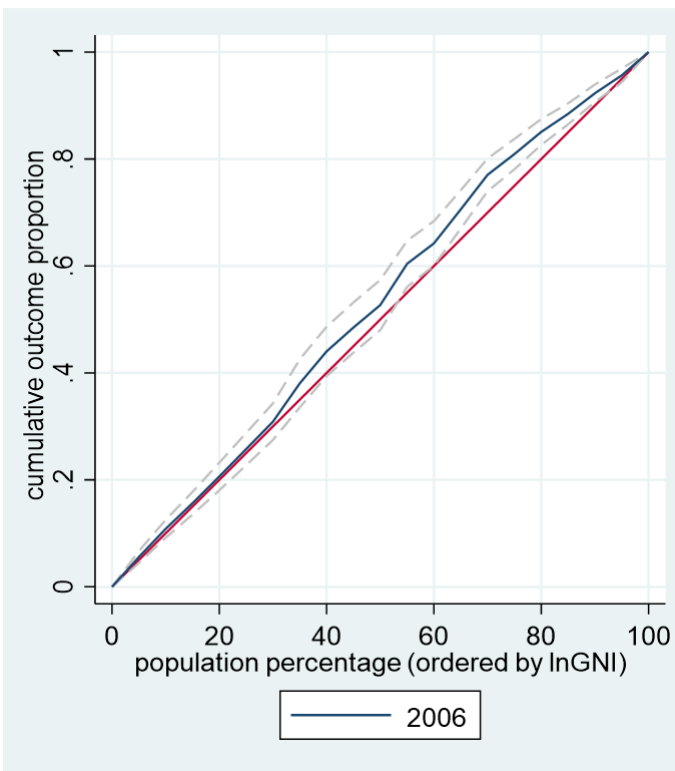

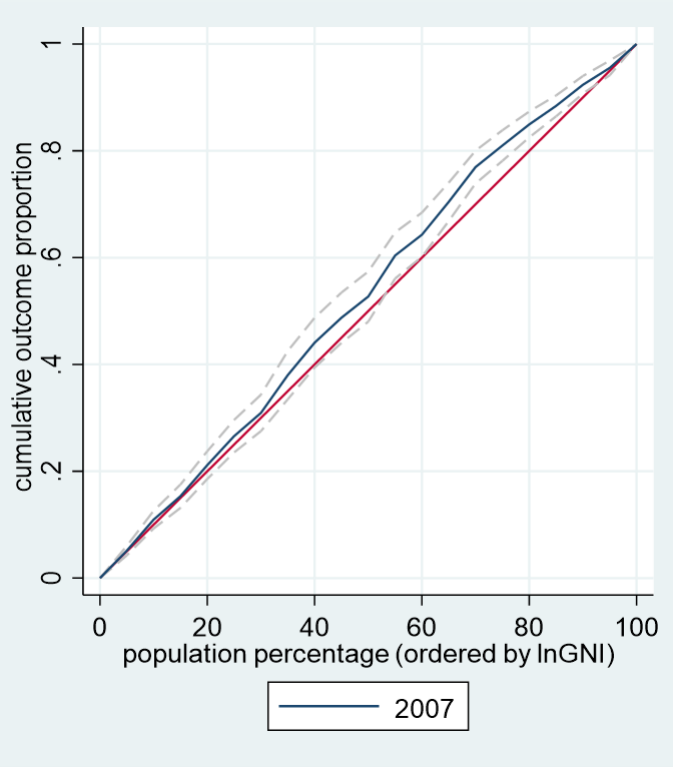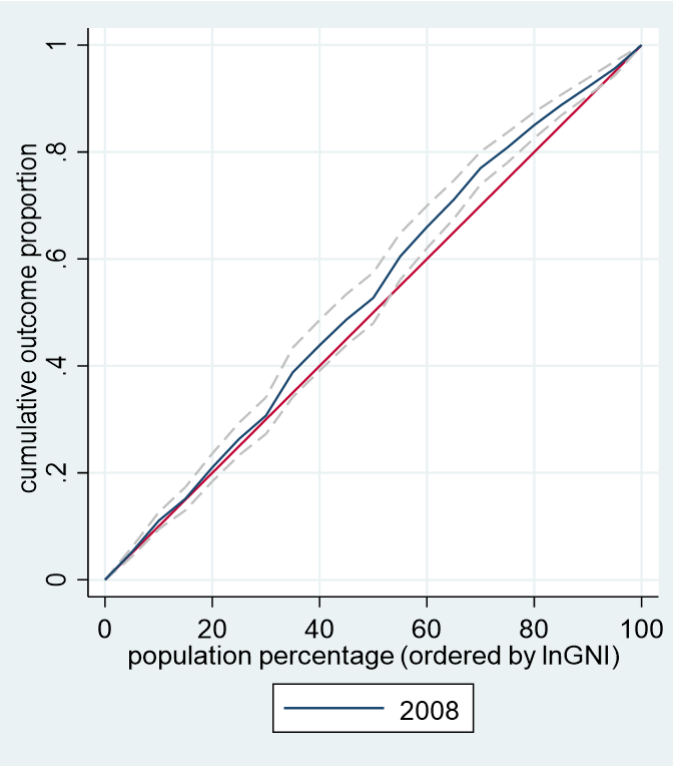

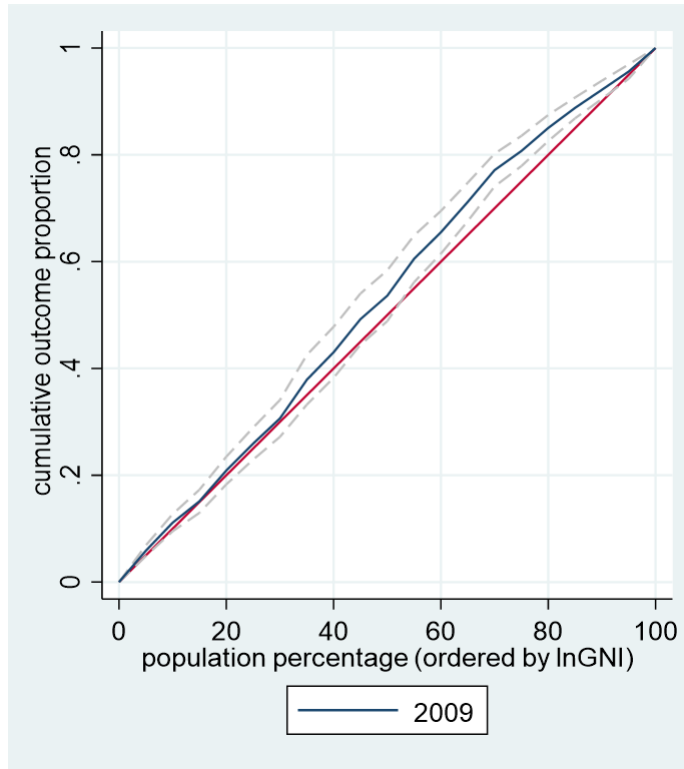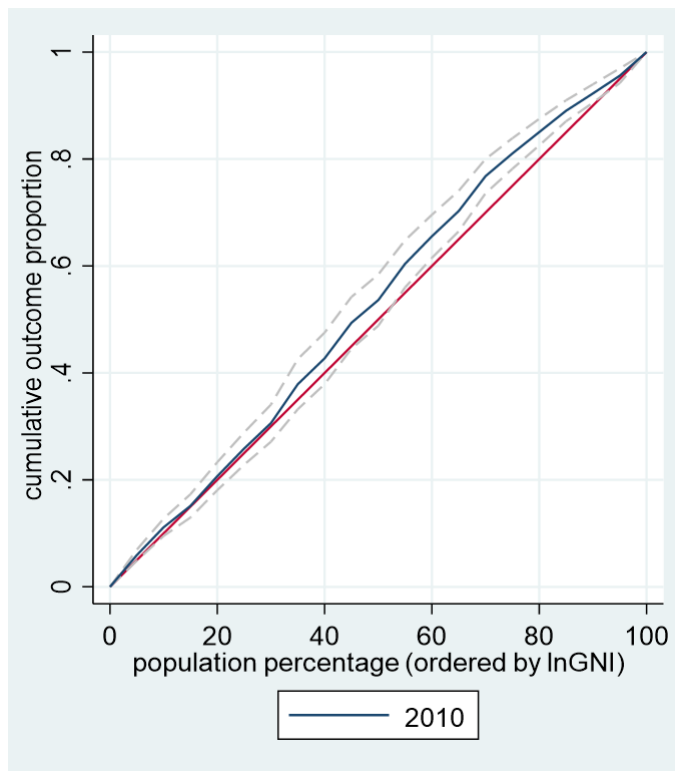

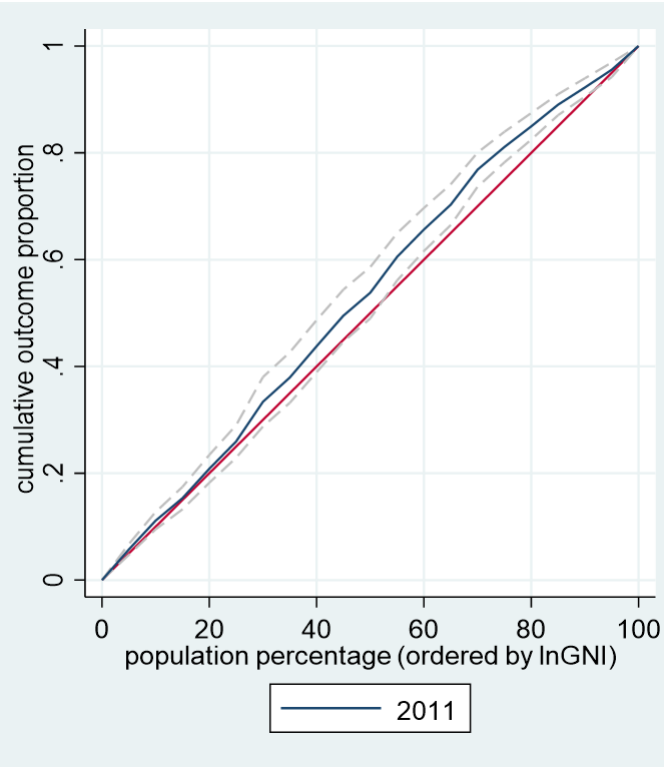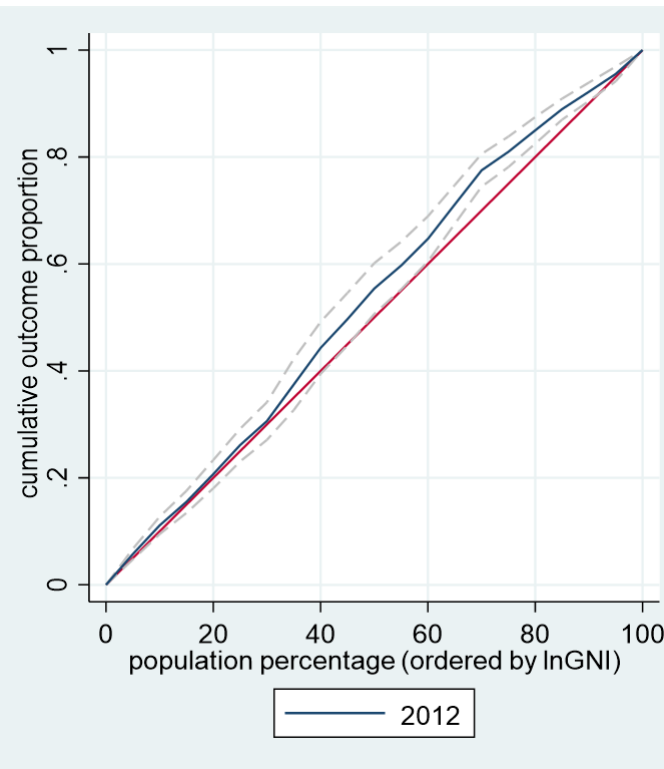

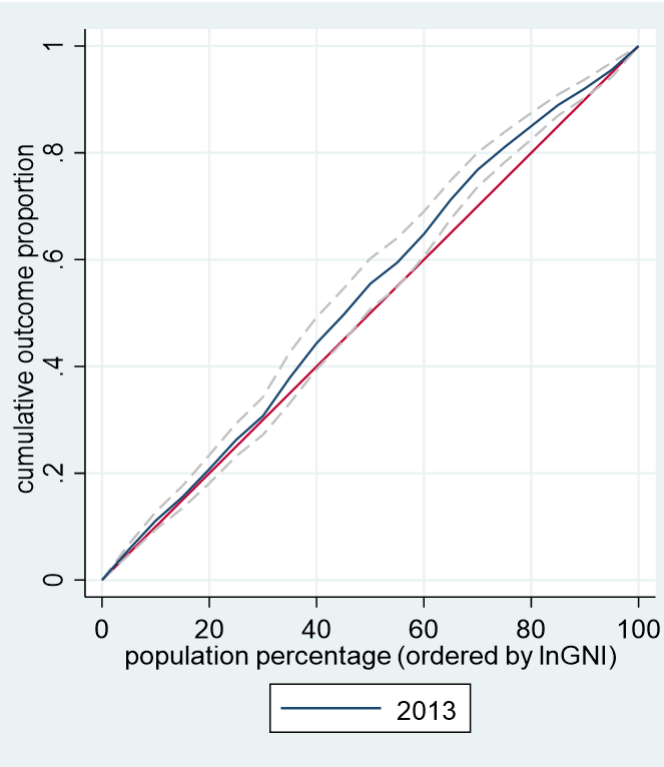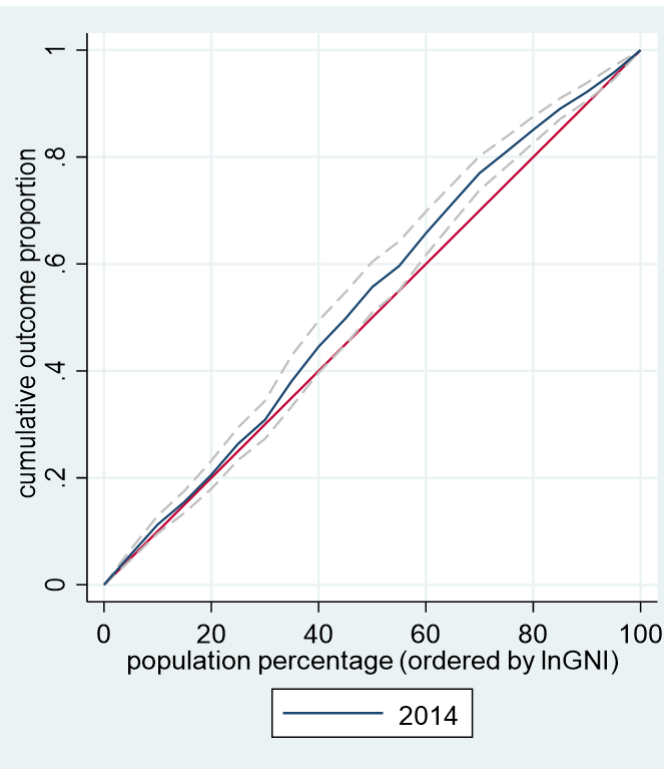

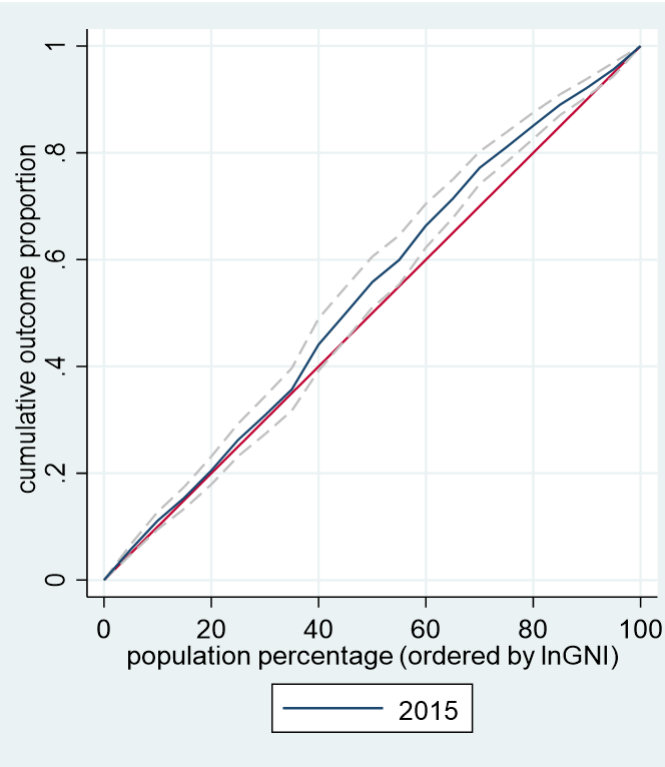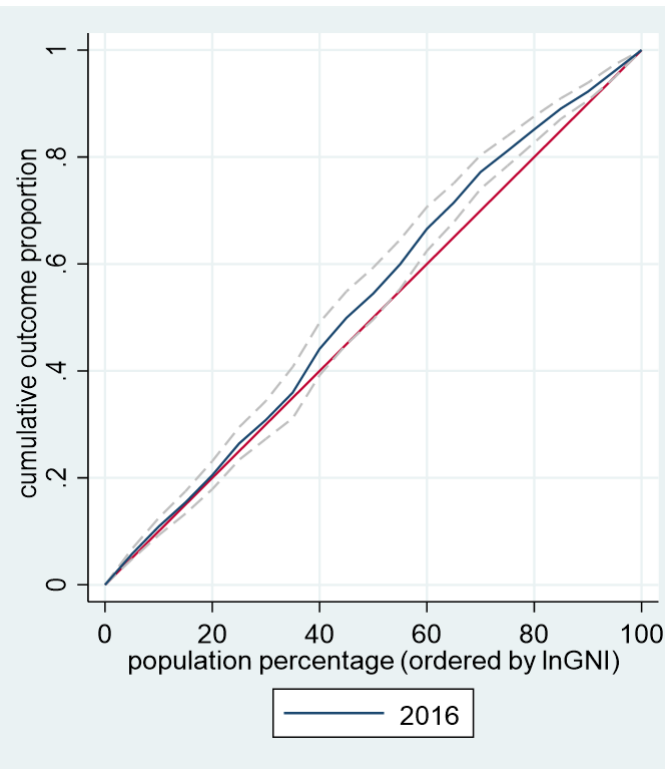

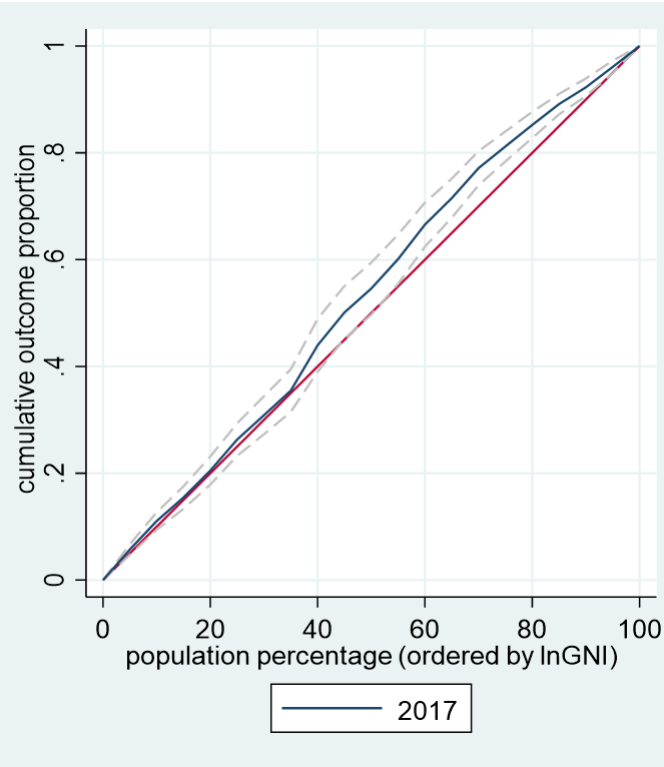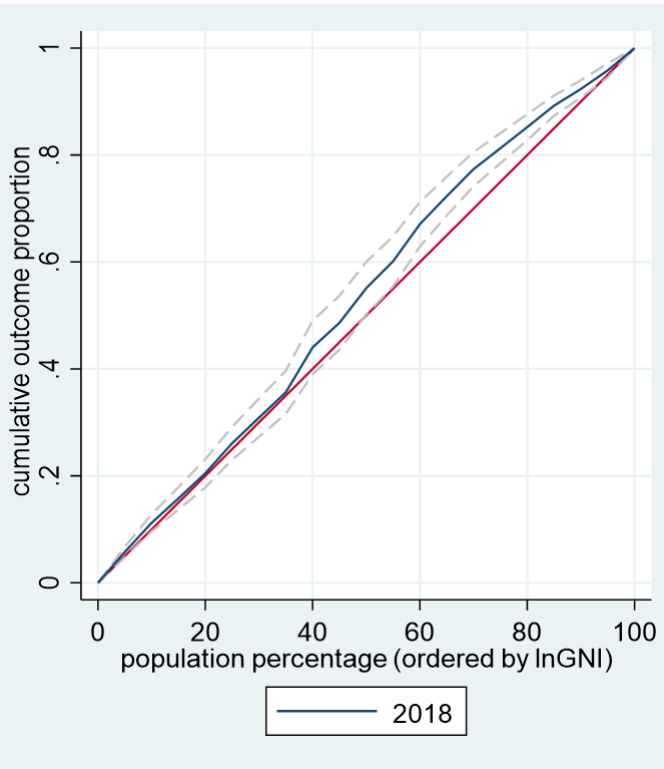

**Figs. S210-227 Concentration curves of age-standardized DALY rates for other cardiovascular and circulatory diseases from 2001 to 2018**

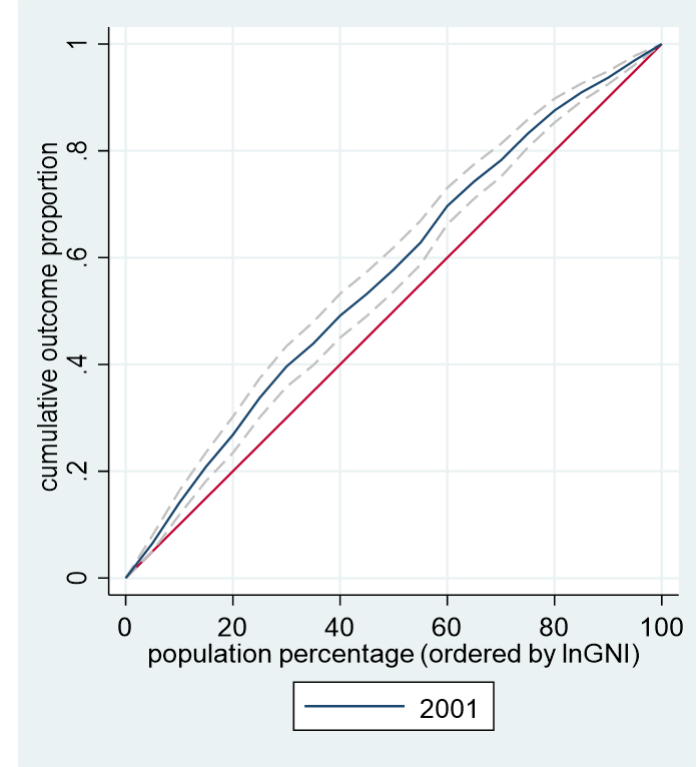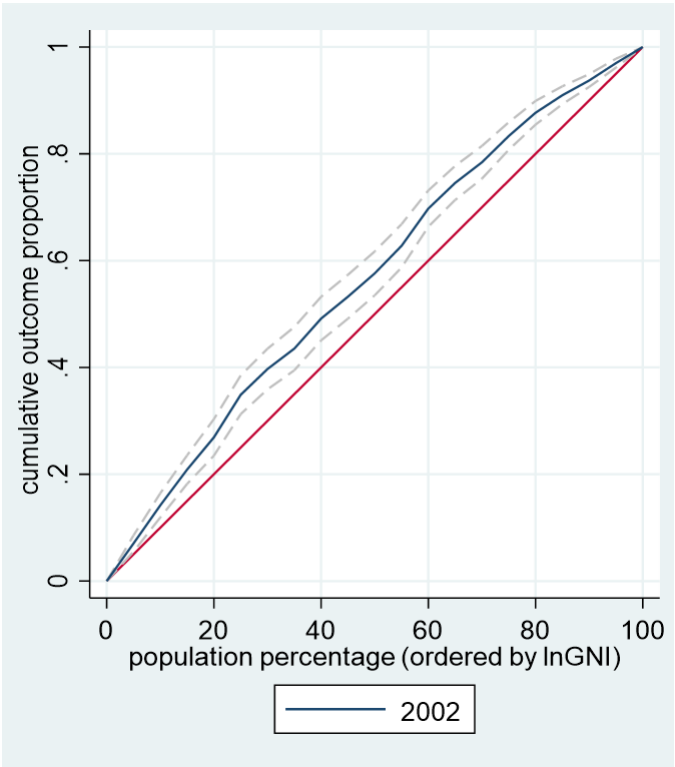

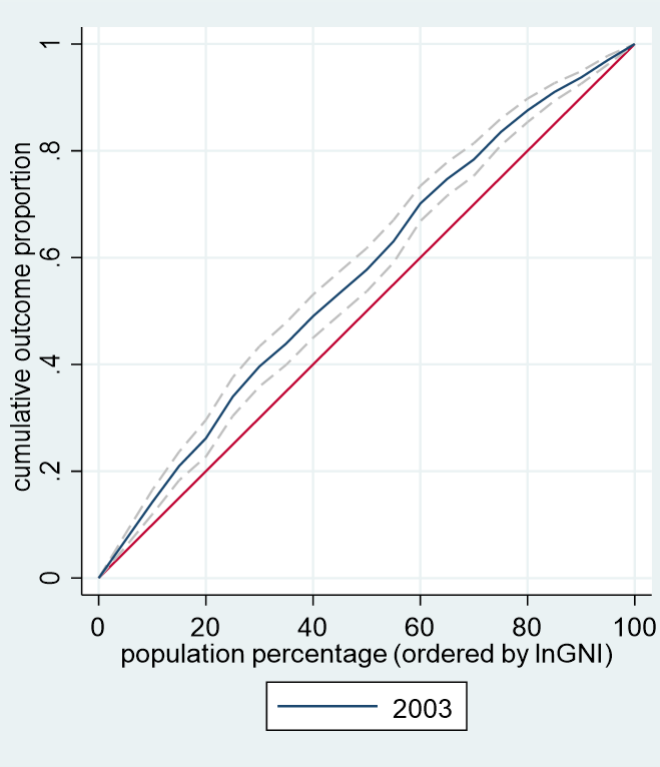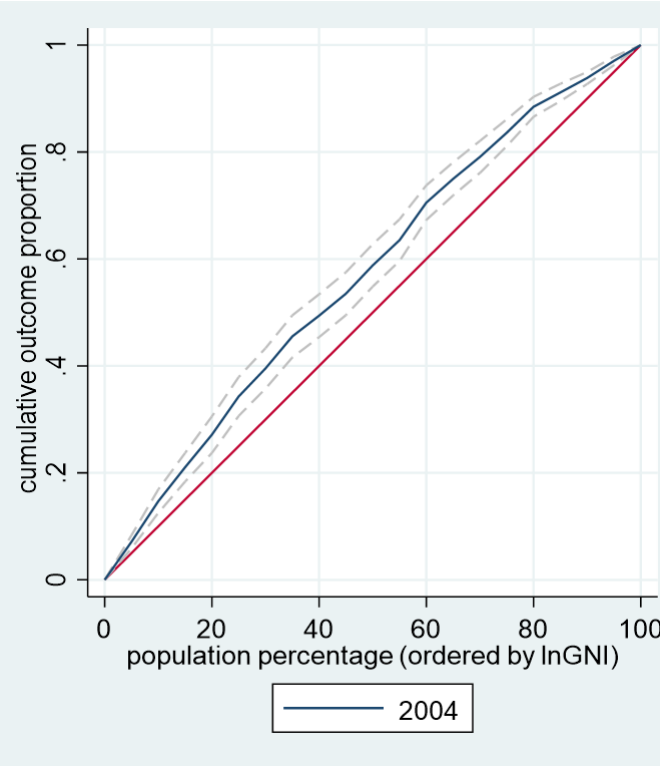

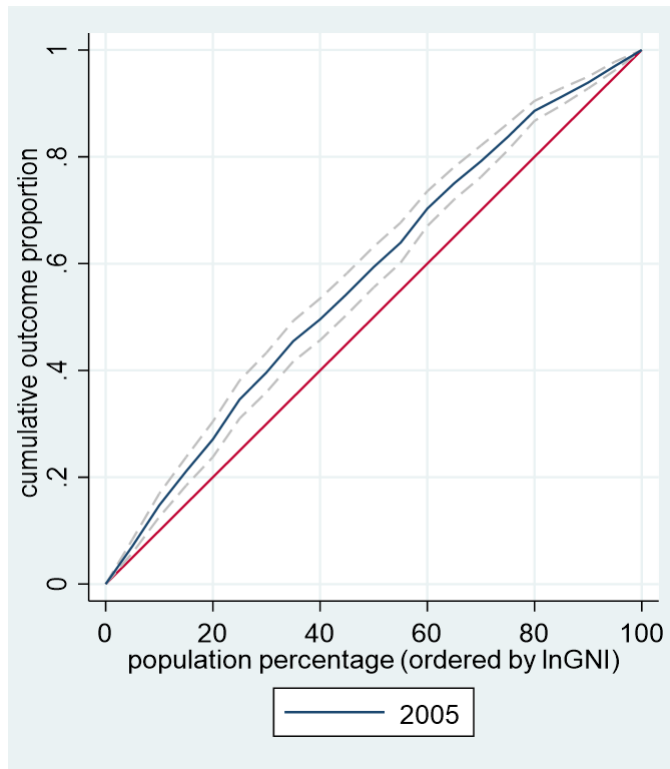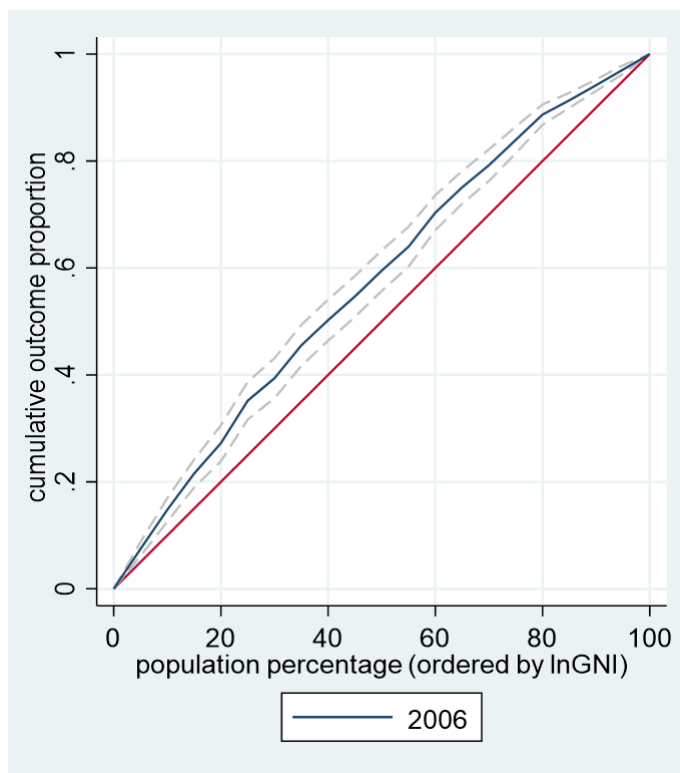

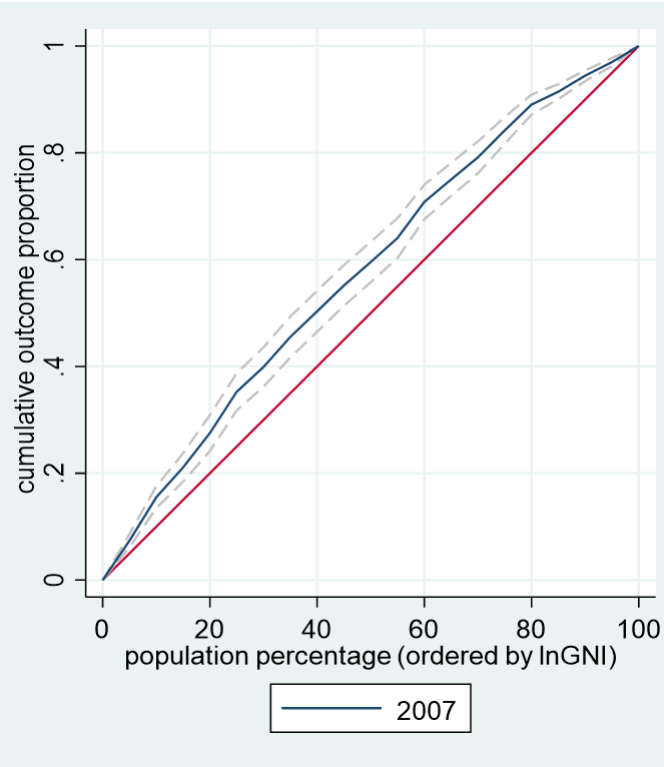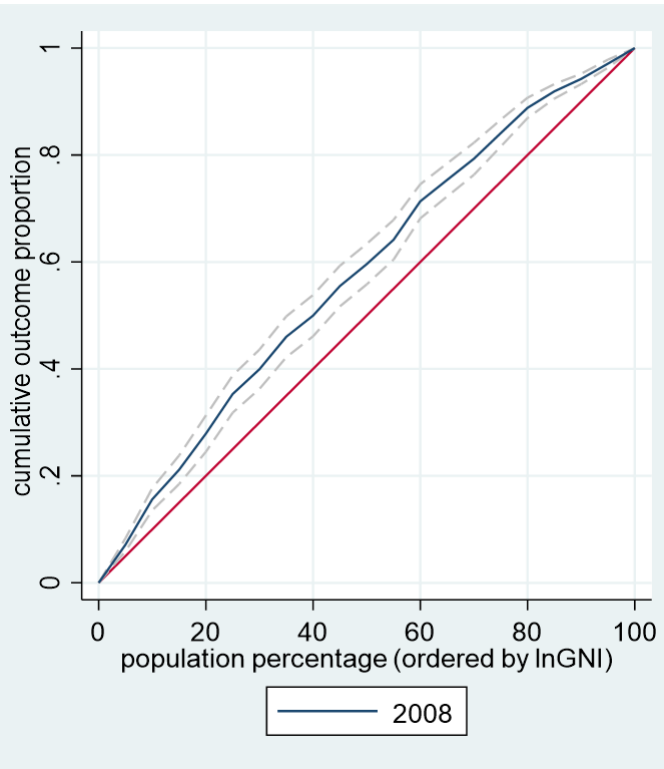

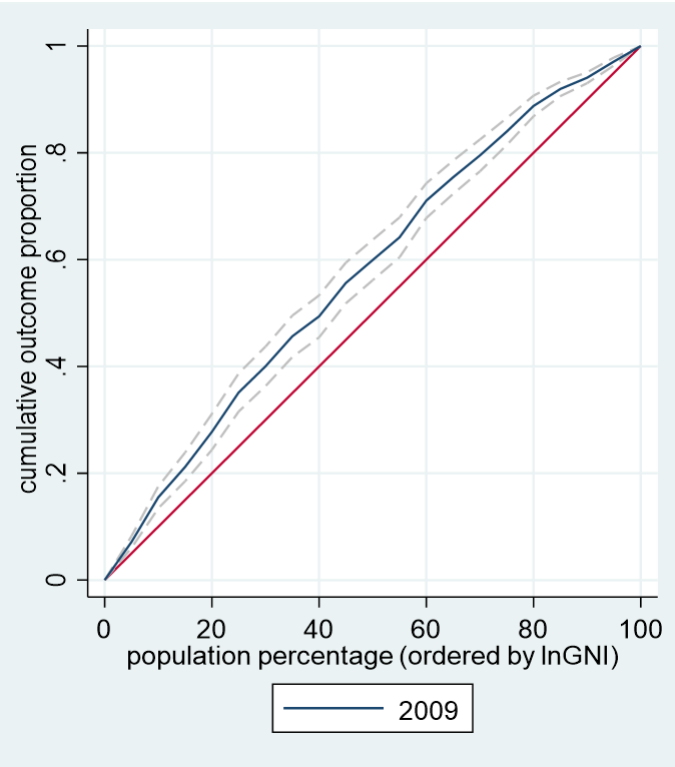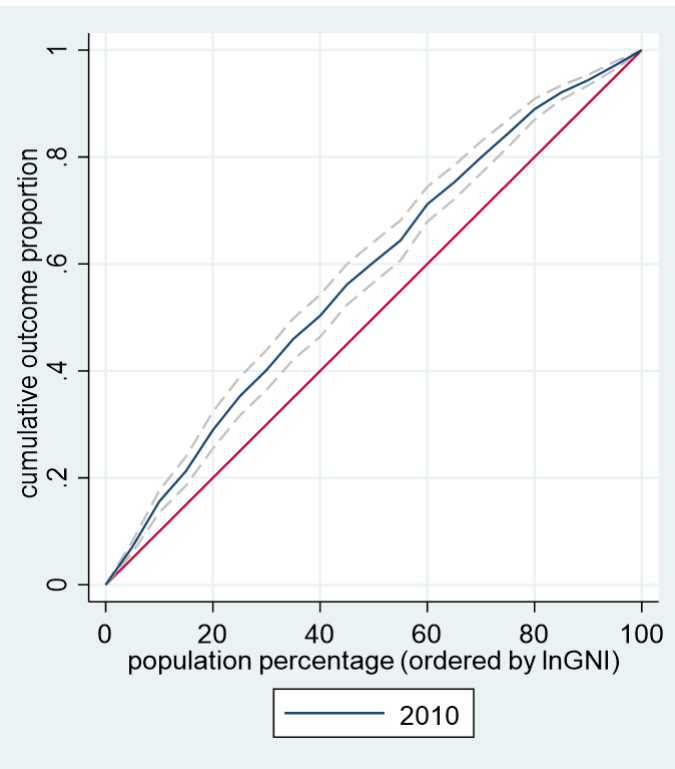

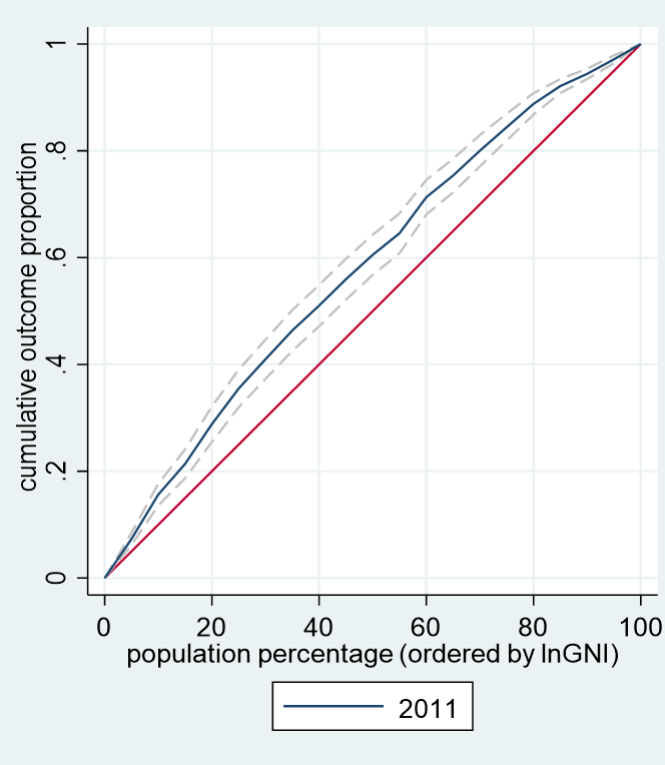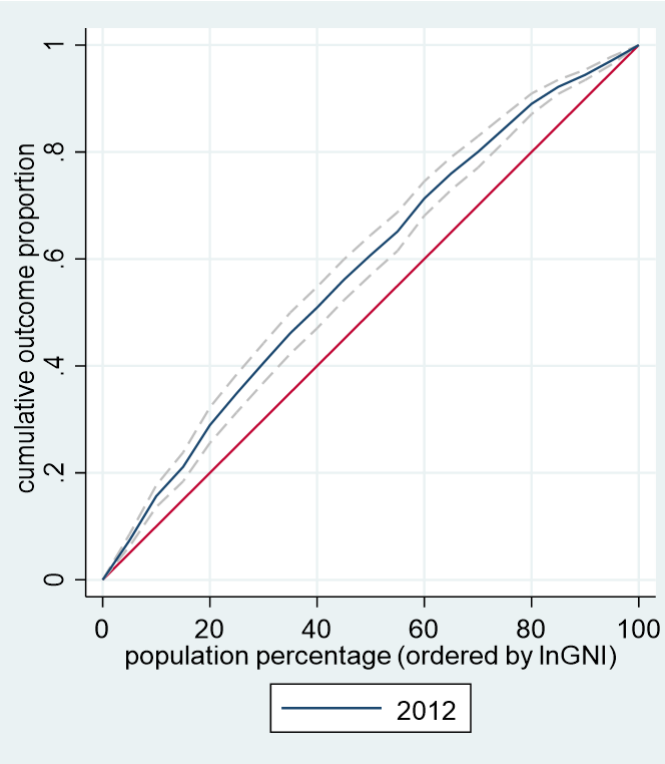

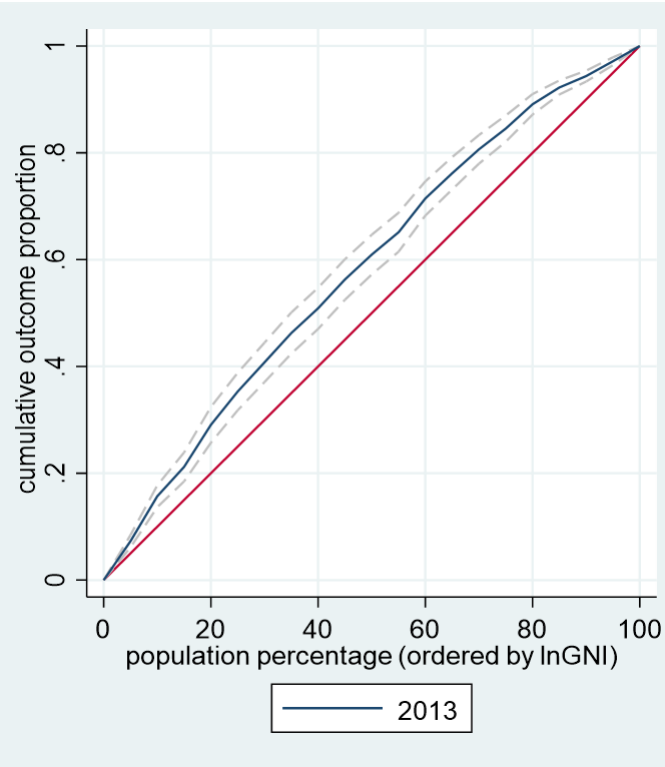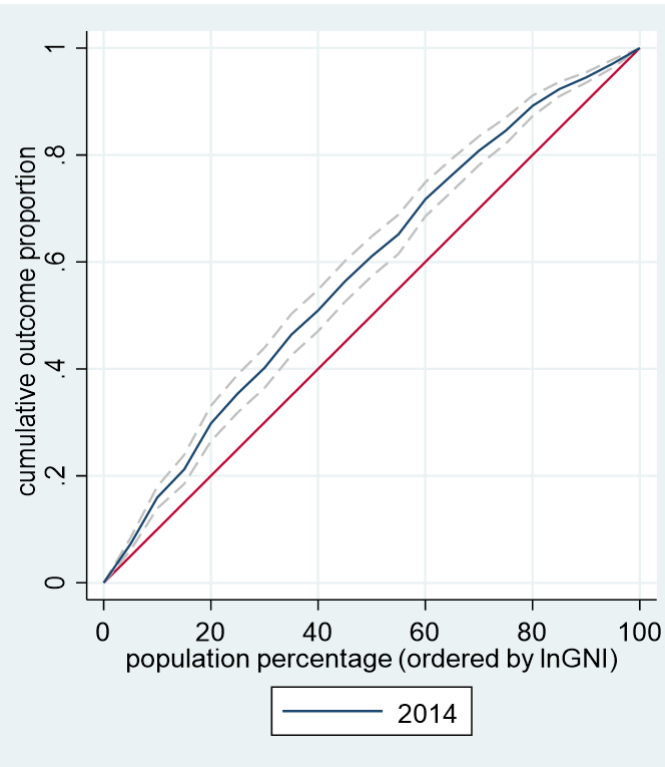

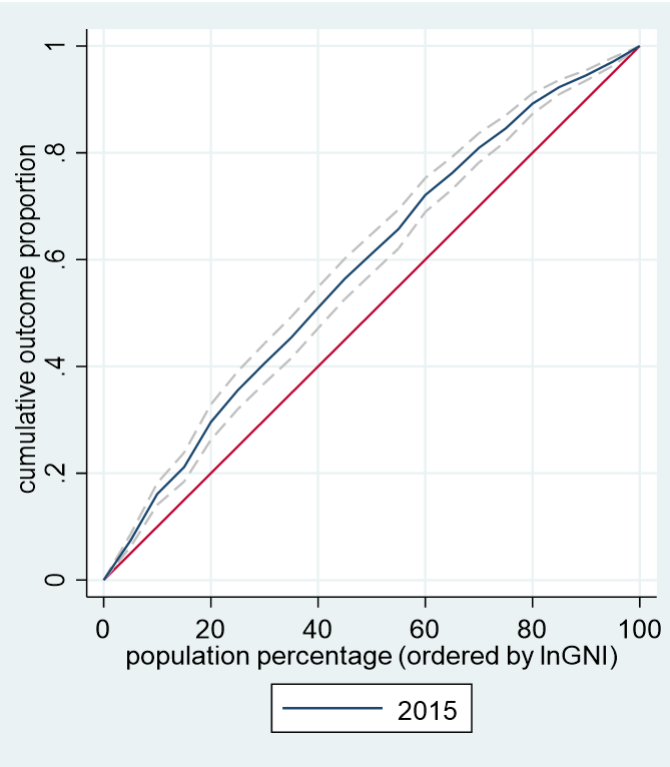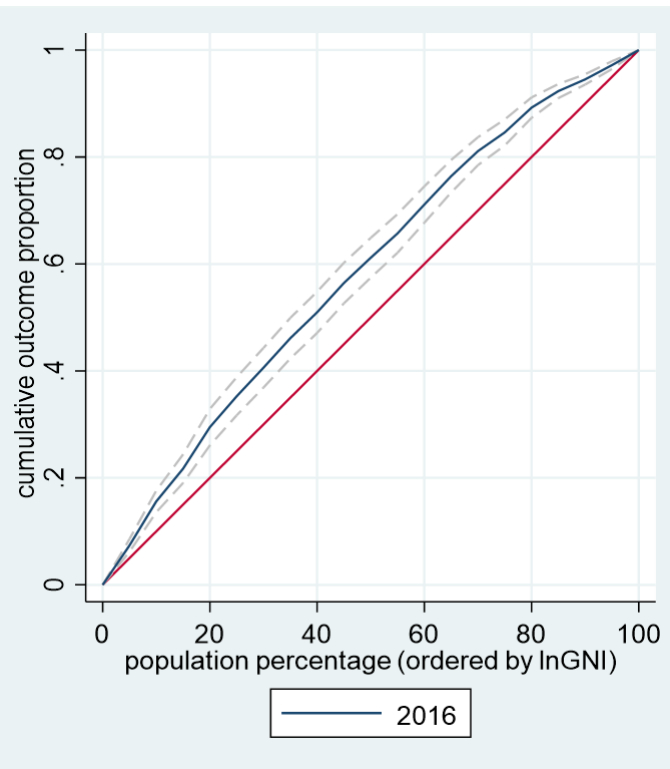

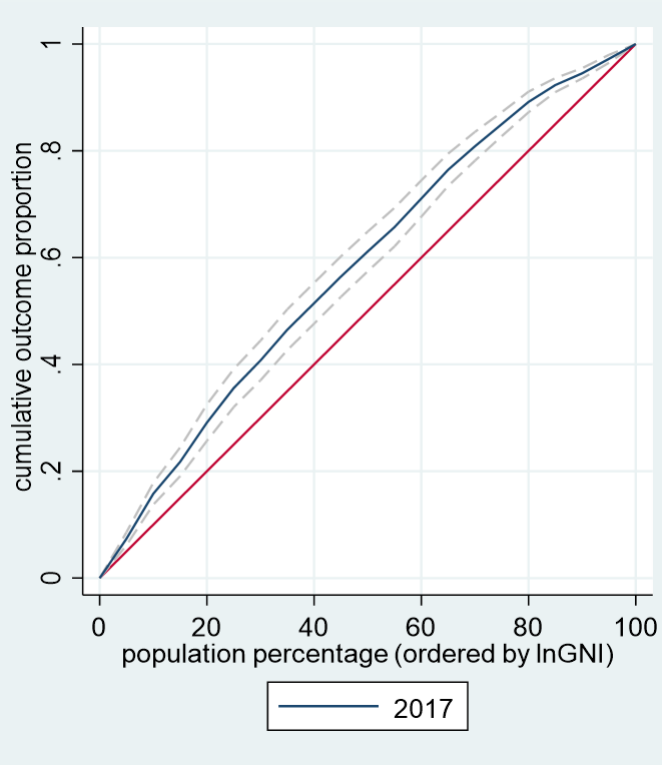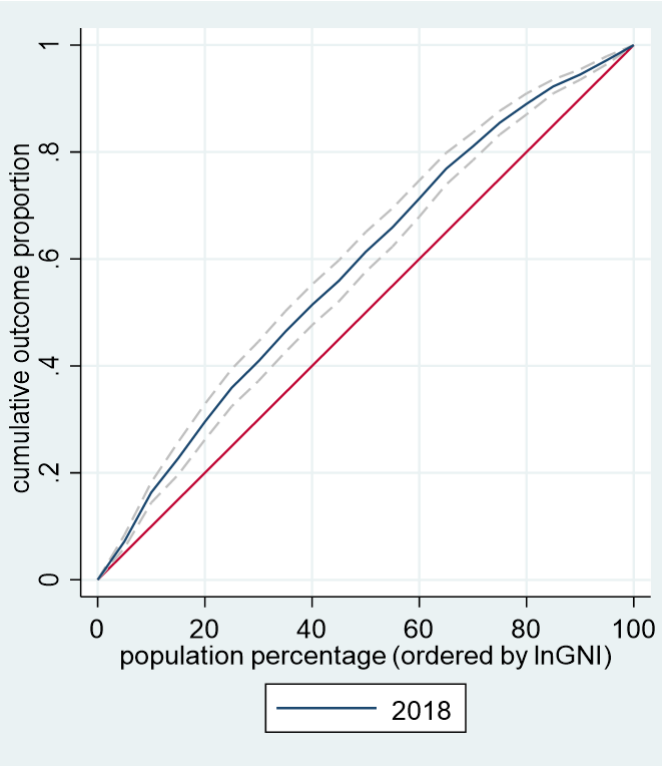

**Table S1 Trends in concentration index of age-standardized DALY rates for rheumatic heart disease from 2000-2019**

| Segment | Period    | APC/AAPC (%) | 95% CI       | <i>p</i> -value |
|---------|-----------|--------------|--------------|-----------------|
| Trend 1 | 2000–2012 | −1.0*        | −1.2 to −0.8 | < 0.001         |
| Trend 2 | 2012–2019 | −0.5*        | −1.0 to −0.0 | 0.036           |
| Total   | 2000–2019 | −0.4*        | −0.6 to −0.2 | < 0.001         |

APC=annual percentage change. AAPC=average annual percentage change. CI=confidence interval. \*Significant at alpha=0.05.

**Table S2 Trends in concentration index of age-standardized DALY rates for ischemic heart disease from 2000-2019**

| Segment | Period    | APC/AAPC (%) | 95% CI        | <i>p</i> -value |
|---------|-----------|--------------|---------------|-----------------|
| Trend 1 | 2000–2002 | −14.4*       | −19.5 to −9.6 | < 0.001         |
| Trend 2 | 2002–2011 | −9.4*        | −9.9 to −8.9  | < 0.001         |
| Trend 3 | 2011–2015 | −3.4*        | −5.7 to −1.2  | 0.007           |
| Trend 4 | 2015–2019 | −0.1         | −1.4 to 1.3   | 0.926           |
| Total   | 2000–2019 | −6.6*        | −7.3 to −5.9  | < 0.001         |

APC=annual percentage change. AAPC=average annual percentage change. CI=confidence interval. \*Significant at alpha=0.05.

**Table S3 Trends in concentration index of age-standardized DALY rates for stroke from 2000-2019**

| Segment | Period    | APC/AAPC (%) | 95% CI       | <i>p</i> -value |
|---------|-----------|--------------|--------------|-----------------|
| Trend 1 | 2000–2011 | −2.6*        | −2.7 to −2.5 | < 0.001         |
| Trend 2 | 2011–2014 | −1.0         | −2.3 to 0.3  | 0.117           |
| Trend 3 | 2014–2019 | 0.2          | −0.1 to 0.5  | 0.179           |
| Total   | 2000–2019 | −1.6*        | −1.8 to −1.4 | < 0.001         |

APC=annual percentage change. AAPC=average annual percentage change. CI=confidence interval. \*Significant at alpha=0.05.

**Table S4 Trends in concentration index of age-standardized DALY rates for hypertensive heart disease from 2000-2019**

| Segment | Period    | APC/AAPC (%) | 95% CI       | <i>p</i> -value |
|---------|-----------|--------------|--------------|-----------------|
| Trend 1 | 2000–2002 | 0.9          | –0.3 to 2.1  | 0.113           |
| Trend 2 | 2002–2006 | 0.1          | –0.5 to 0.7  | 0.696           |
| Trend 3 | 2006–2016 | –0.4*        | –0.5 to –0.3 | < 0.001         |
| Trend 4 | 2016–2019 | –1.0*        | –1.6 to –0.4 | 0.004           |
| Total   | 2000–2019 | –0.2*        | –0.4 to –0.1 | < 0.001         |

APC=annual percentage change. AAPC=average annual percentage change. CI=confidence interval. \*Significant at alpha=0.05.

**Table S5 Trends in concentration index of age-standardized DALY rates for non-rheumatic valvular heart disease from 2000-2019**

| Segment | Period    | APC/AAPC (%) | 95% CI       | <i>p</i> -value |
|---------|-----------|--------------|--------------|-----------------|
| Trend 1 | 2000–2010 | –0.1         | –0.3 to 0.0  | 0.125           |
| Trend 2 | 2010–2019 | –1.2*        | –1.4 to –1.0 | < 0.001         |
| Total   | 2000–2019 | –0.6*        | –0.7 to –0.5 | < 0.001         |

APC=annual percentage change. AAPC=average annual percentage change. CI=confidence interval. \*Significant at alpha=0.05.

**Table S6 Trends in concentration index of age-standardized DALY rates for cardiomyopathy and myocarditis from 2000-2019**

| Segment | Period    | APC/AAPC (%) | 95% CI         | <i>p</i> -value |
|---------|-----------|--------------|----------------|-----------------|
| Trend 1 | 2000–2007 | 12.7*        | 9.6 to 16.0    | < 0.001         |
| Trend 2 | 2007–2010 | –39.1*       | –45.2 to –32.2 | < 0.001         |
| Total 1 | 2000–2010 | –6.3*        | –9.0 to –3.4   | < 0.001         |
| Trend 3 | 2011–2015 | –59.0*       | –78.3 to –41.9 | < 0.001         |
| Trend 4 | 2015–2019 | –2.5         | –14.9 to 8.6   | 0.586           |
| Total 2 | 2011–2019 | –27.7*       | –35.1 to –20.6 | < 0.001         |

APC=annual percentage change. AAPC=average annual percentage change. CI=confidence interval. \*Significant at alpha=0.05.

**Table S7 Trends in concentration index of age-standardized DALY rates for atrial fibrillation and flutter from 2000-2019**

| Segment | Period    | APC/AAPC (%) | 95% CI       | <i>p</i> -value |
|---------|-----------|--------------|--------------|-----------------|
| Trend 1 | 2000–2003 | 0.4          | –0.8 to 1.6  | 0.462           |
| Trend 2 | 2003–2008 | –1.1*        | –1.9 to –0.4 | 0.008           |
| Trend 3 | 2008–2011 | –2.5*        | –4.8 to –0.1 | 0.040           |
| Trend 4 | 2011–2019 | –1.2*        | –1.5 to –1.0 | < 0.001         |
| Total   | 2000–2019 | –1.1*        | –1.6 to –0.7 | < 0.001         |

APC=annual percentage change. AAPC=average annual percentage change. CI=confidence interval. \*Significant at alpha=0.05.

**Table S8 Trends in concentration index of age-standardized DALY rates for aortic aneurysm from 2000-2019**

| Segment | Period    | APC/AAPC (%) | 95% CI       | <i>p</i> -value |
|---------|-----------|--------------|--------------|-----------------|
| Trend 1 | 2000–2002 | 1.2          | –1.8 to 4.2  | 0.401           |
| Trend 2 | 2002–2006 | –2.7*        | –4.1 to –1.2 | 0.002           |
| Trend 3 | 2006–2015 | –5.1*        | –5.4 to –4.8 | < 0.001         |
| Trend 4 | 2015–2019 | 2.1*         | 1.2 to 3.1   | 0.001           |
| Total   | 2000–2019 | –2.5*        | –2.9 to –2.0 | < 0.001         |

APC=annual percentage change. AAPC=average annual percentage change. CI=confidence interval. \*Significant at alpha=0.05.

**Table S9 Trends in concentration index of age-standardized DALY rates for peripheral artery disease from 2000-2019**

| Segment | Period    | APC/AAPC (%) | 95% CI       | <i>p</i> -value |
|---------|-----------|--------------|--------------|-----------------|
| Trend 1 | 2000–2002 | –0.0         | –1.6 to 1.6  | 0.966           |
| Trend 2 | 2002–2007 | –1.1*        | –1.6 to –0.6 | 0.001           |
| Trend 3 | 2007–2010 | –2.5*        | –4.1 to –1.0 | 0.005           |
| Trend 4 | 2010–2019 | –1.8*        | –1.9 to –1.6 | < 0.001         |
| Total   | 2000–2019 | –1.5*        | –1.8 to –1.3 | < 0.001         |

APC=annual percentage change. AAPC=average annual percentage change. CI=confidence interval. \*Significant at alpha=0.05.

**Table S10 Trends in concentration index of age-standardized DALY rates for endocarditis from 2000-2019**

| Segment | Period    | APC/AAPC (%) | 95% CI       | <i>p</i> -value |
|---------|-----------|--------------|--------------|-----------------|
| Trend 1 | 2000–2004 | 5.6*         | 4.1 to 7.0   | < 0.001         |
| Trend 2 | 2004–2019 | –0.7*        | –0.9 to –0.5 | < 0.001         |
| Total   | 2000–2019 | 0.7*         | 0.3 to 1.0   | < 0.001         |

APC=annual percentage change. AAPC=average annual percentage change. CI=confidence interval. \*Significant at alpha=0.05.

**Table S11 Trends in concentration index of age-standardized DALY rates for other cardiovascular and circulatory diseases from 2000-2019**

| Segment | Period    | APC/AAPC (%) | 95% CI       | <i>p</i> -value |
|---------|-----------|--------------|--------------|-----------------|
| Trend 1 | 2000–2013 | –1.8*        | –1.9 to –1.6 | < 0.001         |
| Trend 2 | 2013–2019 | –0.6*        | –1.1 to –0.0 | 0.040           |
| Total   | 2000–2019 | –1.4*        | –1.6 to –1.2 | < 0.001         |

APC=annual percentage change. AAPC=average annual percentage change. CI=confidence interval. \*Significant at alpha=0.05.
